# Supplementary material for: Sex-Dependent Aggregation of Tinnitus in Swedish Families
Source: J Clin Med. 2020 Nov 25;9(12):3812. doi: 10.3390/jcm9123812 (PMC7760080; doi:10.3390/jcm9123812)
Supplement: Supplementary file 1 [file jcm-09-03812-s001.zip › Supplementary Materials 2.xlsx]

## Sheet: Sheet1
ID	AGE	SEX	N of Siblings	N of Siblings with Tinnitus	Constant Tinnitus	Severity	Tinnitus Laterality
Participant 1	39	Female	2	0	Intermittent: "comes and goes", cannot always hear it in a quiet room	Do not know	Both ears, equally
Participant 2	57	Male	1	0	Constant: you can always or usually hear it in a quiet room	Not at all	Both ears, worse in right
Participant 3	31	Male	3	0	Intermittent: "comes and goes", cannot always hear it in a quiet room	Not at all	Do not know
Participant 4	55	Male	2	0	Constant: you can always or usually hear it in a quiet room	Slightly	Both ears, equally
Participant 5	49	Male	0	0	Constant: you can always or usually hear it in a quiet room	Moderately	Both ears, equally
Participant 6	32	Male	1	0	Intermittent: "comes and goes", cannot always hear it in a quiet room	Slightly	Both ears, worse in right
Participant 7	38	Male	NaN	NaN	Constant: you can always or usually hear it in a quiet room	Severely	Both ears, worse in left
Participant 8	41	Female	3	1	Constant: you can always or usually hear it in a quiet room	Severely	Inside the head
Participant 9	53	Female	2	2	Constant: you can always or usually hear it in a quiet room	Not at all	Both ears, worse in right
Participant 10	35	Male	1	0	Intermittent: "comes and goes", cannot always hear it in a quiet room	Slightly	Both ears, equally
Participant 11	28	Female	3	1	Constant: you can always or usually hear it in a quiet room	Slightly	Both ears, equally
Participant 12	33	Male	1	0	Constant: you can always or usually hear it in a quiet room	Not at all	Inside the head
Participant 13	50	Female	1	0	Intermittent: "comes and goes", cannot always hear it in a quiet room	Slightly	Both ears, worse in left
Participant 14	40	Female	0	0	Intermittent: "comes and goes", cannot always hear it in a quiet room	Slightly	Inside the head
Participant 15	33	Female	1	0	Intermittent: "comes and goes", cannot always hear it in a quiet room	Slightly	Both ears, worse in left
Participant 16	30	Female	2	0	Constant: you can always or usually hear it in a quiet room	Severely	Both ears, worse in left
Participant 17	39	Female	2	0	Constant: you can always or usually hear it in a quiet room	Moderately	Both ears, worse in right
Participant 18	55	Female	0	0	Intermittent: "comes and goes", cannot always hear it in a quiet room	Moderately	Left ear
Participant 19	53	Female	1	NaN	Constant: you can always or usually hear it in a quiet room	Moderately	Both ears, equally
Participant 20	49	Male	NaN	NaN	Constant: you can always or usually hear it in a quiet room	Slightly	Both ears, equally
Participant 21	36	Male	NaN	NaN	Constant: you can always or usually hear it in a quiet room	Moderately	Both ears, worse in left
Participant 22	34	Female	1	0	Constant: you can always or usually hear it in a quiet room	Slightly	Both ears, worse in right
Participant 23	52	Male	4	1	Constant: you can always or usually hear it in a quiet room	Not at all	Both ears, worse in right
Participant 24	43	Male	3	0	Constant: you can always or usually hear it in a quiet room	Not at all	Both ears, worse in left
Participant 25	36	Male	0	0	Intermittent: "comes and goes", cannot always hear it in a quiet room	Slightly	Do not know
Participant 26	45	Male	1	0	Intermittent: "comes and goes", cannot always hear it in a quiet room	Slightly	Both ears, equally
Participant 27	40	Female	2	0	Intermittent: "comes and goes", cannot always hear it in a quiet room	Not at all	Inside the head
Participant 28	41	Male	2	0	Constant: you can always or usually hear it in a quiet room	Slightly	Both ears, equally
Participant 29	22	Male	2	0	Constant: you can always or usually hear it in a quiet room	Slightly	Both ears, equally
Participant 30	44	Female	3	0	Constant: you can always or usually hear it in a quiet room	Moderately	Both ears, worse in left
Participant 31	30	Female	1	0	Constant: you can always or usually hear it in a quiet room	Not at all	Both ears, equally
Participant 32	44	Female	2	0	Intermittent: "comes and goes", cannot always hear it in a quiet room	Slightly	Both ears, equally
Participant 33	37	Male	5	0	Intermittent: "comes and goes", cannot always hear it in a quiet room	Slightly	Both ears, worse in left
Participant 34	48	Female	NaN	NaN	Intermittent: "comes and goes", cannot always hear it in a quiet room	Slightly	Right ear
Participant 35	62	Male	2	0	Constant: you can always or usually hear it in a quiet room	Not at all	Inside the head
Participant 36	41	Male	1	0	Constant: you can always or usually hear it in a quiet room	Slightly	Both ears, worse in left
Participant 37	58	Female	2	0	Intermittent: "comes and goes", cannot always hear it in a quiet room	Slightly	Both ears, worse in left
Participant 38	48	Female	2	0	Constant: you can always or usually hear it in a quiet room	Moderately	Both ears, equally
Participant 39	30	Female	2	0	Constant: you can always or usually hear it in a quiet room	Slightly	Both ears, worse in left
Participant 40	49	Male	1	0	Constant: you can always or usually hear it in a quiet room	Moderately	Both ears, equally
Participant 41	31	Female	2	0	Constant: you can always or usually hear it in a quiet room	Slightly	Right ear
Participant 42	30	Female	1	0	Intermittent: "comes and goes", cannot always hear it in a quiet room	Not at all	Do not know
Participant 43	34	Female	1	0	Intermittent: "comes and goes", cannot always hear it in a quiet room	Not at all	Do not know
Participant 44	73	Male	4	0	Constant: you can always or usually hear it in a quiet room	Moderately	Inside the head
Participant 45	56	Male	1	0	Constant: you can always or usually hear it in a quiet room	Moderately	Both ears, equally
Participant 46	41	Female	6	NaN	Intermittent: "comes and goes", cannot always hear it in a quiet room	Moderately	Other (please specify below)
Participant 47	28	Male	2	1	Intermittent: "comes and goes", cannot always hear it in a quiet room	Moderately	Both ears, equally
Participant 48	26	Female	1	0	Intermittent: "comes and goes", cannot always hear it in a quiet room	Moderately	Both ears, equally
Participant 49	37	Female	1	0	Intermittent: "comes and goes", cannot always hear it in a quiet room	Not at all	Both ears, equally
Participant 50	52	Male	3	0	Constant: you can always or usually hear it in a quiet room	Moderately	Both ears, worse in right
Participant 51	51	Female	4	1	Constant: you can always or usually hear it in a quiet room	Slightly	Left ear
Participant 52	52	Male	4	0	Intermittent: "comes and goes", cannot always hear it in a quiet room	Slightly	Both ears, worse in right
Participant 53	30	Female	2	0	Intermittent: "comes and goes", cannot always hear it in a quiet room	Severely	Inside the head
Participant 54	52	Male	1	0	Constant: you can always or usually hear it in a quiet room	Severely	Inside the head
Participant 55	28	Female	2	0	Constant: you can always or usually hear it in a quiet room	Moderately	Both ears, worse in left
Participant 56	40	Female	1	NaN	Intermittent: "comes and goes", cannot always hear it in a quiet room	Moderately	Both ears, worse in right
Participant 57	55	Male	0	0	Constant: you can always or usually hear it in a quiet room	Moderately	Both ears, equally
Participant 58	43	Female	1	NaN	Constant: you can always or usually hear it in a quiet room	Not at all	Both ears, equally
Participant 59	60	Female	1	0	Intermittent: "comes and goes", cannot always hear it in a quiet room	Moderately	Inside the head
Participant 60	41	Male	0	0	Constant: you can always or usually hear it in a quiet room	Not at all	Inside the head
Participant 61	53	Female	1	0	Constant: you can always or usually hear it in a quiet room	Moderately	Inside the head
Participant 62	37	Male	3	0	Intermittent: "comes and goes", cannot always hear it in a quiet room	Not at all	Both ears, worse in right
Participant 63	31	Female	7	1	Constant: you can always or usually hear it in a quiet room	Severely	Both ears, worse in left
Participant 64	41	Female	0	0	Constant: you can always or usually hear it in a quiet room	Not at all	Both ears, equally
Participant 65	27	Male			Constant: you can always or usually hear it in a quiet room	Severely	Both ears, equally
Participant 66	33	Male	2	NaN	Constant: you can always or usually hear it in a quiet room	Moderately	Both ears, worse in left
Participant 67	72	Female	3	NaN	Constant: you can always or usually hear it in a quiet room	Severely	Inside the head
Participant 68	56	Male	1	0	Constant: you can always or usually hear it in a quiet room	Not at all	Both ears, equally
Participant 69	48	Male	2	NaN	Intermittent: "comes and goes", cannot always hear it in a quiet room	Slightly	Both ears, equally
Participant 70	49	Male	1	NaN	Constant: you can always or usually hear it in a quiet room	Moderately	Both ears, equally
Participant 71	50	Male	1	0	Intermittent: "comes and goes", cannot always hear it in a quiet room	Slightly	Left ear
Participant 72	50	Male	1	0	Constant: you can always or usually hear it in a quiet room	Moderately	Both ears, worse in right
Participant 73	51	Male	1	0	Constant: you can always or usually hear it in a quiet room	Moderately	Both ears, worse in left
Participant 74	35	Male	2	1	Constant: you can always or usually hear it in a quiet room	Severely	Both ears, worse in right
Participant 75	39	Male	2	0	Constant: you can always or usually hear it in a quiet room	Moderately	Both ears, worse in right
Participant 76	30	Female	1	0	Intermittent: "comes and goes", cannot always hear it in a quiet room	Slightly	Both ears, worse in right
Participant 77	45	Female	2	0	Intermittent: "comes and goes", cannot always hear it in a quiet room	Slightly	Do not know
Participant 78	39	Female	2	0	Constant: you can always or usually hear it in a quiet room	Moderately	Inside the head
Participant 79	68	Male	2	0	Constant: you can always or usually hear it in a quiet room	Moderately	Left ear
Participant 80	41	Male	2	0	Constant: you can always or usually hear it in a quiet room	Not at all	Inside the head
Participant 81	32	Female	0	0	Intermittent: "comes and goes", cannot always hear it in a quiet room	Not at all	Right ear
Participant 82	26	Female	2	0	Intermittent: "comes and goes", cannot always hear it in a quiet room	Not at all	Both ears, worse in right
Participant 83	64	Male	2	NaN	Constant: you can always or usually hear it in a quiet room	Slightly	Inside the head
Participant 84	52	Female	2	0	Intermittent: "comes and goes", cannot always hear it in a quiet room	Not at all	Inside the head
Participant 85	40	Male	1	9	Constant: you can always or usually hear it in a quiet room	Moderately	Both ears, worse in left
Participant 86	51	Female	1	0	Constant: you can always or usually hear it in a quiet room	Not at all	Inside the head
Participant 87	53	Male	0	0	Intermittent: "comes and goes", cannot always hear it in a quiet room	Slightly	Both ears, equally
Participant 88	54	Male	1	1	Intermittent: "comes and goes", cannot always hear it in a quiet room	Slightly	Left ear
Participant 89	34	Male	2	0	Constant: you can always or usually hear it in a quiet room	Slightly	Both ears, equally
Participant 90	39	Male	3	0	Constant: you can always or usually hear it in a quiet room	Slightly	Other (please specify below)
Participant 91	38	Male	4	1	Constant: you can always or usually hear it in a quiet room	Slightly	Both ears, worse in right
Participant 92	34	Female	1	0	Constant: you can always or usually hear it in a quiet room	Moderately	Both ears, worse in left
Participant 93	46	Male	1	0	Constant: you can always or usually hear it in a quiet room	Slightly	Both ears, equally
Participant 94	79	Female	1	0	Constant: you can always or usually hear it in a quiet room	Slightly	Left ear
Participant 95	33	Male	1	0	Constant: you can always or usually hear it in a quiet room	Slightly	Right ear
Participant 96	53	Male	3	0	Constant: you can always or usually hear it in a quiet room	Severely	Both ears, equally
Participant 97	52	Female	1	0	Intermittent: "comes and goes", cannot always hear it in a quiet room	Slightly	Both ears, worse in right
Participant 98	74	Female	2	0	Constant: you can always or usually hear it in a quiet room	Slightly	Inside the head
Participant 99	62	Male	0	0	Intermittent: "comes and goes", cannot always hear it in a quiet room	Not at all	Both ears, equally
Participant 100	62	Female	4	NaN	Intermittent: "comes and goes", cannot always hear it in a quiet room	Not at all	Both ears, equally
Participant 101	35	Male	2	0	Constant: you can always or usually hear it in a quiet room	Moderately	Left ear
Participant 102	40	Male	2	0	Constant: you can always or usually hear it in a quiet room	Not at all	Both ears, worse in left
Participant 103	44	Female	1	0	Intermittent: "comes and goes", cannot always hear it in a quiet room	Severely	Both ears, worse in left
Participant 104	44	Male	NaN	NaN	Intermittent: "comes and goes", cannot always hear it in a quiet room	Not at all	Inside the head
Participant 105	34	Male	2	0	Constant: you can always or usually hear it in a quiet room	Severely	Both ears, equally
Participant 106	35	Male	0	0	Constant: you can always or usually hear it in a quiet room	Slightly	Both ears, equally
Participant 107	54	Male	1	0	Constant: you can always or usually hear it in a quiet room	Moderately	Both ears, worse in left
Participant 108	69	Male	2	0	Intermittent: "comes and goes", cannot always hear it in a quiet room	Slightly	Inside the head
Participant 109	55	Male	2	0	Intermittent: "comes and goes", cannot always hear it in a quiet room	Not at all	Inside the head
Participant 110	48	Male	3	0	Intermittent: "comes and goes", cannot always hear it in a quiet room	Slightly	Both ears, equally
Participant 111	34	Female	2	0	Constant: you can always or usually hear it in a quiet room	Slightly	Both ears, equally
Participant 112	46	Male	3	0	Constant: you can always or usually hear it in a quiet room	Not at all	Both ears, worse in right
Participant 113	63	Female	1	NaN	Constant: you can always or usually hear it in a quiet room	Moderately	Left ear
Participant 114	54	Female	1	0	Constant: you can always or usually hear it in a quiet room	Slightly	Both ears, worse in right
Participant 115	56	Male	2	0	Constant: you can always or usually hear it in a quiet room	Severely	Inside the head
Participant 116	69	Male	1	0	Constant: you can always or usually hear it in a quiet room	Not at all	Both ears, equally
Participant 117	71	Female	2	2	Constant: you can always or usually hear it in a quiet room	Moderately	Both ears, worse in left
Participant 118	47	Female	1	0	Intermittent: "comes and goes", cannot always hear it in a quiet room	Slightly	Both ears, worse in right
Participant 119	46	Female	1	0	Intermittent: "comes and goes", cannot always hear it in a quiet room	Not at all	Inside the head
Participant 120	46	Male	2	1	Constant: you can always or usually hear it in a quiet room	Moderately	Both ears, worse in right
Participant 121	67	Female	0	0	Constant: you can always or usually hear it in a quiet room	Not at all	Left ear
Participant 122	35	Female	2	0	Intermittent: "comes and goes", cannot always hear it in a quiet room	Slightly	Both ears, worse in right
Participant 123	67	Female	4	NaN	Intermittent: "comes and goes", cannot always hear it in a quiet room	Slightly	Inside the head
Participant 124	35	Male	1	0	Constant: you can always or usually hear it in a quiet room	Not at all	Both ears, equally
Participant 125	60	Female	2	0	Constant: you can always or usually hear it in a quiet room	Slightly	Both ears, worse in left
Participant 126	52	Female	3	1	Constant: you can always or usually hear it in a quiet room	Slightly	Both ears, worse in right
Participant 127	38	Female	2	0	Constant: you can always or usually hear it in a quiet room	Moderately	Both ears, worse in left
Participant 128	57	Male	4	1	Constant: you can always or usually hear it in a quiet room	Not at all	Inside the head
Participant 129	56	Female	3	0	Constant: you can always or usually hear it in a quiet room	Slightly	Both ears, worse in right
Participant 130	31	Female	2	0	Constant: you can always or usually hear it in a quiet room	Not at all	Do not know
Participant 131	58	Male	2	0	Constant: you can always or usually hear it in a quiet room	Moderately	Inside the head
Participant 132	61	Male	NaN	NaN	Intermittent: "comes and goes", cannot always hear it in a quiet room	Slightly	Both ears, worse in left
Participant 133	28	Male	2	0	Constant: you can always or usually hear it in a quiet room	Moderately	Both ears, worse in left
Participant 134	44	Female	1	0	Constant: you can always or usually hear it in a quiet room	Slightly	Right ear
Participant 135	52	Male	2	0	Intermittent: "comes and goes", cannot always hear it in a quiet room	Severely	Left ear
Participant 136	37	Male	2	1	Intermittent: "comes and goes", cannot always hear it in a quiet room	Not at all	Left ear
Participant 137	43	Female	2	0	Intermittent: "comes and goes", cannot always hear it in a quiet room	Not at all	Right ear
Participant 138	75	Male	3	3	Constant: you can always or usually hear it in a quiet room	Not at all	Inside the head
Participant 139	67	Female	1	0	Constant: you can always or usually hear it in a quiet room	Slightly	Both ears, worse in left
Participant 140	51	Male	0	0	Constant: you can always or usually hear it in a quiet room	Moderately	Inside the head
Participant 141	71	Male	1	0	Constant: you can always or usually hear it in a quiet room	Moderately	Both ears, worse in left
Participant 142	34	Female	1	0	Constant: you can always or usually hear it in a quiet room	Not at all	Inside the head
Participant 143	49	Female	1	0	Intermittent: "comes and goes", cannot always hear it in a quiet room	Slightly	Both ears, equally
Participant 144	52	Male	3	0	Constant: you can always or usually hear it in a quiet room	Slightly	Both ears, equally
Participant 145	71	Female	NaN	NaN	Intermittent: "comes and goes", cannot always hear it in a quiet room	Moderately	Inside the head
Participant 146	66	Female	3	0	Intermittent: "comes and goes", cannot always hear it in a quiet room	Not at all	Both ears, equally
Participant 147	45	Male	1	0	Constant: you can always or usually hear it in a quiet room	Severely	Both ears, worse in left
Participant 148	73	Female	1	0	Constant: you can always or usually hear it in a quiet room	Not at all	Left ear
Participant 149	53	Male	0	0	Constant: you can always or usually hear it in a quiet room	Not at all	Both ears, worse in left
Participant 150	72	Male	2	1	Intermittent: "comes and goes", cannot always hear it in a quiet room	Not at all	Inside the head
Participant 151	45	Male	1	0	Constant: you can always or usually hear it in a quiet room	Moderately	Both ears, worse in left
Participant 152	66	Male	0	0	Constant: you can always or usually hear it in a quiet room	Not at all	Inside the head
Participant 153	55	Female	1	0	Constant: you can always or usually hear it in a quiet room	Severely	Both ears, equally
Participant 154	47	Female	1	NaN	Constant: you can always or usually hear it in a quiet room	Slightly	Both ears, worse in right
Participant 155	38	Female	2	0	Constant: you can always or usually hear it in a quiet room	Moderately	Other (please specify below)
Participant 156	32	Male	0	0	Intermittent: "comes and goes", cannot always hear it in a quiet room	Not at all	Both ears, worse in right
Participant 157	33	Male	2	1	Constant: you can always or usually hear it in a quiet room	Severely	Both ears, worse in left
Participant 158	75	Male	1	0	Constant: you can always or usually hear it in a quiet room	Moderately	Inside the head
Participant 159	50	Female	2	NaN	Intermittent: "comes and goes", cannot always hear it in a quiet room	Slightly	Both ears, worse in left
Participant 160	65	Female			Constant: you can always or usually hear it in a quiet room	Moderately	Both ears, equally
Participant 161	50	Male	4	0	Intermittent: "comes and goes", cannot always hear it in a quiet room	Slightly	Both ears, worse in left
Participant 162	64	Female	3	0	Constant: you can always or usually hear it in a quiet room	Moderately	Left ear
Participant 163	57	Female	4	0	Intermittent: "comes and goes", cannot always hear it in a quiet room	Not at all	Both ears, worse in left
Participant 164	46	Male	2	0	Constant: you can always or usually hear it in a quiet room	Slightly	Right ear
Participant 165	40	Female	1	0	Intermittent: "comes and goes", cannot always hear it in a quiet room	Slightly	Both ears, equally
Participant 166	38	Female	1	0	Intermittent: "comes and goes", cannot always hear it in a quiet room	Slightly	Both ears, worse in left
Participant 167	54	Male	3	0	Constant: you can always or usually hear it in a quiet room	Moderately	Inside the head
Participant 168	64	Female	1	0	Constant: you can always or usually hear it in a quiet room	Moderately	Both ears, worse in right
Participant 169	50	Female	1	0	Constant: you can always or usually hear it in a quiet room	Not at all	Both ears, worse in right
Participant 170	70	Male	4	0	Constant: you can always or usually hear it in a quiet room	Severely	Other (please specify below)
Participant 171	41	Female	1	0	Intermittent: "comes and goes", cannot always hear it in a quiet room	Slightly	Both ears, equally
Participant 172	77	Female	1	1	Intermittent: "comes and goes", cannot always hear it in a quiet room	Slightly	Inside the head
Participant 173	45	Male	2	1	Constant: you can always or usually hear it in a quiet room	Slightly	Both ears, worse in left
Participant 174	48	Female	5	0	Intermittent: "comes and goes", cannot always hear it in a quiet room	Slightly	Left ear
Participant 175	53	Female	1	0	Intermittent: "comes and goes", cannot always hear it in a quiet room	Not at all	Other (please specify below)
Participant 176	33	Female	0	0	Intermittent: "comes and goes", cannot always hear it in a quiet room	Not at all	Both ears, worse in right
Participant 177	59	Female	1	0	Intermittent: "comes and goes", cannot always hear it in a quiet room	Slightly	Inside the head
Participant 178	66	Female	1	0	Constant: you can always or usually hear it in a quiet room	Moderately	Both ears, worse in left
Participant 179	38	Male	2	0	Constant: you can always or usually hear it in a quiet room	Severely	Both ears, equally
Participant 180	51	Female	2	NaN	Constant: you can always or usually hear it in a quiet room	Slightly	Left ear
Participant 181	36	Female	2	0	Intermittent: "comes and goes", cannot always hear it in a quiet room	Slightly	Do not know
Participant 182	75	Male	NaN	NaN	Constant: you can always or usually hear it in a quiet room	Slightly	Left ear
Participant 183	44	Female	4	0	Intermittent: "comes and goes", cannot always hear it in a quiet room	Slightly	Left ear
Participant 184	32	Female	2	1	Constant: you can always or usually hear it in a quiet room	Not at all	Both ears, equally
Participant 185	66	Male	3	0	Constant: you can always or usually hear it in a quiet room	Moderately	Other (please specify below)
Participant 186	39	Male	2	0	Constant: you can always or usually hear it in a quiet room	Severely	Both ears, worse in left
Participant 187	74	Female	1	0	Constant: you can always or usually hear it in a quiet room	Moderately	Both ears, worse in left
Participant 188	37	Female	1	0	Intermittent: "comes and goes", cannot always hear it in a quiet room	Slightly	Both ears, equally
Participant 189	31	Female	4	0	Constant: you can always or usually hear it in a quiet room	Moderately	Both ears, worse in left
Participant 190	70	Female	1	NaN	Constant: you can always or usually hear it in a quiet room	Slightly	Inside the head
Participant 191	52	Male	1	0	Constant: you can always or usually hear it in a quiet room	Moderately	Both ears, equally
Participant 192	69	Female	0	0	Constant: you can always or usually hear it in a quiet room	Moderately	Both ears, equally
Participant 193	48	Female	0	0	Constant: you can always or usually hear it in a quiet room	Slightly	Inside the head
Participant 194	72	Female	1	NaN	Constant: you can always or usually hear it in a quiet room	Moderately	Both ears, equally
Participant 195	85	Female			Intermittent: "comes and goes", cannot always hear it in a quiet room	Moderately	Other (please specify below)
Participant 196	30	Male	0	0	Constant: you can always or usually hear it in a quiet room	Slightly	Both ears, equally
Participant 197	53	Male	1	0	Constant: you can always or usually hear it in a quiet room	Moderately	Both ears, worse in left
Participant 198	52	Male	NaN	NaN	Constant: you can always or usually hear it in a quiet room	Not at all	Both ears, equally
Participant 199	69	Male	2	0	Intermittent: "comes and goes", cannot always hear it in a quiet room	Not at all	Both ears, equally
Participant 200	51	Male	1	0	Constant: you can always or usually hear it in a quiet room	Slightly	Right ear
Participant 201	50	Male	1	NaN	Constant: you can always or usually hear it in a quiet room	Slightly	Both ears, equally
Participant 202	64	Female	2	NaN	Constant: you can always or usually hear it in a quiet room	Moderately	Inside the head
Participant 203	51	Female	1	0	Constant: you can always or usually hear it in a quiet room	Not at all	Both ears, equally
Participant 204	36	Female	0	0	Constant: you can always or usually hear it in a quiet room	Not at all	Both ears, equally
Participant 205	54	Female	1	NaN	Constant: you can always or usually hear it in a quiet room	Moderately	Inside the head
Participant 206	49	Female	1	0	Intermittent: "comes and goes", cannot always hear it in a quiet room	Slightly	Both ears, worse in left
Participant 207	33	Female	1	0	Constant: you can always or usually hear it in a quiet room	Moderately	Both ears, equally
Participant 208	29	Female	4	NaN	Constant: you can always or usually hear it in a quiet room	Slightly	Both ears, equally
Participant 209	33	Female	2	0	Intermittent: "comes and goes", cannot always hear it in a quiet room	Slightly	Both ears, equally
Participant 210	65	Male	1	0	Constant: you can always or usually hear it in a quiet room	Not at all	Inside the head
Participant 211	62	Female	1	1	Intermittent: "comes and goes", cannot always hear it in a quiet room	Slightly	Both ears, equally
Participant 212	67	Female	2	1	Constant: you can always or usually hear it in a quiet room	Slightly	Both ears, equally
Participant 213	50	Male	1	0	Constant: you can always or usually hear it in a quiet room	Slightly	Both ears, equally
Participant 214	44	Male	3	0	Intermittent: "comes and goes", cannot always hear it in a quiet room	Not at all	Inside the head
Participant 215	70	Female	2	NaN	Constant: you can always or usually hear it in a quiet room	Slightly	Left ear
Participant 216	35	Female	0	0	Intermittent: "comes and goes", cannot always hear it in a quiet room	Not at all	Both ears, equally
Participant 217	35	Female			Constant: you can always or usually hear it in a quiet room	Severely	Both ears, worse in left
Participant 218	33	Female	2	0	Constant: you can always or usually hear it in a quiet room	Not at all	Both ears, equally
Participant 219	66	Female	2	0	Intermittent: "comes and goes", cannot always hear it in a quiet room	Slightly	Both ears, equally
Participant 220	36	Female	2	0	Constant: you can always or usually hear it in a quiet room	Slightly	Inside the head
Participant 221	32	Male	1	0	Constant: you can always or usually hear it in a quiet room	Severely	Both ears, equally
Participant 222	74	Male	1	NaN	Constant: you can always or usually hear it in a quiet room	Not at all	Both ears, equally
Participant 223	46	Male	1	0	Intermittent: "comes and goes", cannot always hear it in a quiet room	Slightly	Both ears, worse in left
Participant 224	66	Male	NaN	NaN	Constant: you can always or usually hear it in a quiet room	Not at all	Inside the head
Participant 225	29	Female	2	0	Constant: you can always or usually hear it in a quiet room	Not at all	Inside the head
Participant 226	58	Male	1	0	Intermittent: "comes and goes", cannot always hear it in a quiet room	Slightly	Both ears, equally
Participant 227	39	Female	3	0	Intermittent: "comes and goes", cannot always hear it in a quiet room	Not at all	Both ears, worse in right
Participant 228	50	Male	0	0	Constant: you can always or usually hear it in a quiet room	Slightly	Both ears, worse in right
Participant 229	31	Female	1	0	Constant: you can always or usually hear it in a quiet room	Moderately	Inside the head
Participant 230	34	Male	3	0	Constant: you can always or usually hear it in a quiet room	Slightly	Both ears, worse in left
Participant 231	73	Male	1	0	Intermittent: "comes and goes", cannot always hear it in a quiet room	Not at all	Inside the head
Participant 232	72	Male	0	NaN	Constant: you can always or usually hear it in a quiet room	Moderately	Both ears, equally
Participant 233	35	Female	4	0	Constant: you can always or usually hear it in a quiet room	Severely	Both ears, equally
Participant 234	41	Male	3	1	Constant: you can always or usually hear it in a quiet room	Slightly	Both ears, equally
Participant 235	29	Female			Constant: you can always or usually hear it in a quiet room	Moderately	Both ears, equally
Participant 236	32	Male	1	0	Intermittent: "comes and goes", cannot always hear it in a quiet room	Not at all	Both ears, worse in right
Participant 237	36	Male	3	0	Constant: you can always or usually hear it in a quiet room	Not at all	Do not know
Participant 238	50	Male	2	0	Constant: you can always or usually hear it in a quiet room	Moderately	Both ears, equally
Participant 239	41	Female	1	NaN	Intermittent: "comes and goes", cannot always hear it in a quiet room	Slightly	Both ears, equally
Participant 240	65	Male	1	0	Constant: you can always or usually hear it in a quiet room	Moderately	Both ears, worse in left
Participant 241	48	Female	1	NaN	Constant: you can always or usually hear it in a quiet room	Moderately	Right ear
Participant 242	55	Male	3	NaN	Constant: you can always or usually hear it in a quiet room	Severely	Inside the head
Participant 243	75	Male	1	0	Constant: you can always or usually hear it in a quiet room	Moderately	Both ears, equally
Participant 244	36	Female	2	0	Constant: you can always or usually hear it in a quiet room	Moderately	Both ears, equally
Participant 245	71	Male	2	0	Intermittent: "comes and goes", cannot always hear it in a quiet room	Slightly	Inside the head
Participant 246	80	Female	0	NaN	Constant: you can always or usually hear it in a quiet room	Slightly	Left ear
Participant 247	68	Male	2	0	Intermittent: "comes and goes", cannot always hear it in a quiet room	Slightly	Left ear
Participant 248	46	Male	1	0	Intermittent: "comes and goes", cannot always hear it in a quiet room	Not at all	Both ears, equally
Participant 249	43	Male	3	0	Constant: you can always or usually hear it in a quiet room	Moderately	Both ears, equally
Participant 250	37	Male	3	2	Intermittent: "comes and goes", cannot always hear it in a quiet room	Moderately	Both ears, equally
Participant 251	60	Male	2	NaN	Constant: you can always or usually hear it in a quiet room	Moderately	Inside the head
Participant 252	65	Female	5	0	Constant: you can always or usually hear it in a quiet room	Moderately	Left ear
Participant 253	32	Male	0	0	Constant: you can always or usually hear it in a quiet room	Moderately	Inside the head
Participant 254	76	Male	1	NaN	Intermittent: "comes and goes", cannot always hear it in a quiet room	Moderately	Both ears, equally
Participant 255	40	Male	4	0	Constant: you can always or usually hear it in a quiet room	Moderately	Both ears, worse in right
Participant 256	52	Male	2	0	Constant: you can always or usually hear it in a quiet room	Moderately	Both ears, equally
Participant 257	48	Male	3	0	Constant: you can always or usually hear it in a quiet room	Moderately	Both ears, worse in right
Participant 258	52	Male	1	NaN	Constant: you can always or usually hear it in a quiet room	Slightly	Both ears, worse in right
Participant 259	48	Male	2	0	Constant: you can always or usually hear it in a quiet room	Severely	Left ear
Participant 260	34	Male	0	0	Constant: you can always or usually hear it in a quiet room	Slightly	Left ear
Participant 261	66	Male	0	0	Constant: you can always or usually hear it in a quiet room	Severely	Inside the head
Participant 262	68	Female	2	0	Constant: you can always or usually hear it in a quiet room	Severely	Left ear
Participant 263	60	Male	1	0	Constant: you can always or usually hear it in a quiet room	Severely	Right ear
Participant 264	35	Female	1	0	Intermittent: "comes and goes", cannot always hear it in a quiet room	Not at all	Inside the head
Participant 265	53	Male	1	0	Intermittent: "comes and goes", cannot always hear it in a quiet room	Slightly	Both ears, worse in left
Participant 266	38	Female	2	0	Constant: you can always or usually hear it in a quiet room	Severely	Inside the head
Participant 267	49	Female	1	0	Constant: you can always or usually hear it in a quiet room	Moderately	Both ears, worse in left
Participant 268	26	Male	1	1	Constant: you can always or usually hear it in a quiet room	Severely	Both ears, worse in right
Participant 269	46	Male	1	1	Constant: you can always or usually hear it in a quiet room	Moderately	Both ears, equally
Participant 270	44	Male			Intermittent: "comes and goes", cannot always hear it in a quiet room	Slightly	Left ear
Participant 271	43	Female	1	0	Constant: you can always or usually hear it in a quiet room	Severely	Right ear
Participant 272	31	Male	2	0	Constant: you can always or usually hear it in a quiet room	Not at all	Both ears, equally
Participant 273	48	Female	NaN	NaN	Intermittent: "comes and goes", cannot always hear it in a quiet room	Slightly	Do not know
Participant 274	29	Female	1	0	Intermittent: "comes and goes", cannot always hear it in a quiet room	Moderately	Both ears, equally
Participant 275	42	Female	2	0	Intermittent: "comes and goes", cannot always hear it in a quiet room	Slightly	Both ears, equally
Participant 276	51	Male	1	0	Constant: you can always or usually hear it in a quiet room	Moderately	Both ears, equally
Participant 277	33	Female	3	0	Constant: you can always or usually hear it in a quiet room	Slightly	Both ears, equally
Participant 278	32	Male	2	1	Constant: you can always or usually hear it in a quiet room	Slightly	Both ears, equally
Participant 279	20	Female	3	0	Constant: you can always or usually hear it in a quiet room	Slightly	Other (please specify below)
Participant 280	37	Female	0	0	Intermittent: "comes and goes", cannot always hear it in a quiet room	Slightly	Right ear
Participant 281	42	Male	5	0	Intermittent: "comes and goes", cannot always hear it in a quiet room	Moderately	Both ears, equally
Participant 282	53	Female	0	0	Constant: you can always or usually hear it in a quiet room	Severely	Inside the head
Participant 283	38	Female	0	0	Intermittent: "comes and goes", cannot always hear it in a quiet room	Not at all	Both ears, worse in right
Participant 284	32	Male	6	0	Intermittent: "comes and goes", cannot always hear it in a quiet room	Not at all	Left ear
Participant 285	47	Female	4	NaN	Intermittent: "comes and goes", cannot always hear it in a quiet room	Moderately	Both ears, worse in right
Participant 286	32	Female	1	NaN	Constant: you can always or usually hear it in a quiet room	Slightly	Both ears, worse in right
Participant 287	39	Female	0	0	Constant: you can always or usually hear it in a quiet room	Slightly	Both ears, worse in right
Participant 288	33	Male	1	0	Constant: you can always or usually hear it in a quiet room	Slightly	Inside the head
Participant 289	65	Male	0	0	Intermittent: "comes and goes", cannot always hear it in a quiet room	Slightly	Both ears, equally
Participant 290	31	Male	1	1	Constant: you can always or usually hear it in a quiet room	Moderately	Both ears, worse in right
Participant 291	35	Male	2	0	Intermittent: "comes and goes", cannot always hear it in a quiet room	Not at all	Both ears, worse in left
Participant 292	56	Male	NaN	NaN	Constant: you can always or usually hear it in a quiet room	Moderately	Left ear
Participant 293	52	Male	3	0	Intermittent: "comes and goes", cannot always hear it in a quiet room	Slightly	Right ear
Participant 294	29	Female	1	0	Constant: you can always or usually hear it in a quiet room	Not at all	Both ears, equally
Participant 295	40	Male	2	0	Intermittent: "comes and goes", cannot always hear it in a quiet room	Not at all	Do not know
Participant 296	27	Male	2	0	Constant: you can always or usually hear it in a quiet room	Moderately	Both ears, worse in left
Participant 297	75	Female	3	0	Constant: you can always or usually hear it in a quiet room	Moderately	Both ears, equally
Participant 298	28	Male	3	1	Intermittent: "comes and goes", cannot always hear it in a quiet room	Not at all	Inside the head
Participant 299	62	Male	1	0	Intermittent: "comes and goes", cannot always hear it in a quiet room	Do not know	Inside the head
Participant 300	30	Male	1	1	Constant: you can always or usually hear it in a quiet room	Slightly	Both ears, worse in left
Participant 301	54	Male	2	0	Constant: you can always or usually hear it in a quiet room	Not at all	Both ears, equally
Participant 302	50	Female	1	0	Constant: you can always or usually hear it in a quiet room	Slightly	Left ear
Participant 303	62	Male	3	NaN	Constant: you can always or usually hear it in a quiet room	Moderately	Inside the head
Participant 304	34	Male	3	1	Intermittent: "comes and goes", cannot always hear it in a quiet room	Not at all	Both ears, worse in left
Participant 305	51	Female	1	0	Intermittent: "comes and goes", cannot always hear it in a quiet room	Not at all	Right ear
Participant 306	41	Female	4	0	Intermittent: "comes and goes", cannot always hear it in a quiet room	Not at all	Inside the head
Participant 307	39	Male	1	0	Constant: you can always or usually hear it in a quiet room	Not at all	Both ears, equally
Participant 308	29	Female	2	0	Intermittent: "comes and goes", cannot always hear it in a quiet room	Severely	Both ears, worse in left
Participant 309	40	Female	1	0	Constant: you can always or usually hear it in a quiet room	Moderately	Both ears, worse in right
Participant 310	56	Male	0	0	Constant: you can always or usually hear it in a quiet room	Slightly	Both ears, worse in right
Participant 311	53	Female	1	NaN	Constant: you can always or usually hear it in a quiet room	Moderately	Both ears, equally
Participant 312	31	Female			Intermittent: "comes and goes", cannot always hear it in a quiet room	Moderately	Right ear
Participant 313	54	Female	1	0	Constant: you can always or usually hear it in a quiet room	Severely	Both ears, worse in left
Participant 314	42	Male	1	0	Constant: you can always or usually hear it in a quiet room	Not at all	Inside the head
Participant 315	30	Female	2	0	Intermittent: "comes and goes", cannot always hear it in a quiet room	Moderately	Inside the head
Participant 316	36	Male	1	0	Constant: you can always or usually hear it in a quiet room	Slightly	Both ears, worse in right
Participant 317	39	Male	1	0	Constant: you can always or usually hear it in a quiet room	Slightly	Left ear
Participant 318	49	Female	2	NaN	Constant: you can always or usually hear it in a quiet room	Moderately	Inside the head
Participant 319	52	Female	1	0	Constant: you can always or usually hear it in a quiet room	Severely	Right ear
Participant 320	68	Female	2	0	Constant: you can always or usually hear it in a quiet room	Slightly	Both ears, equally
Participant 321	32	Female	7	0	Intermittent: "comes and goes", cannot always hear it in a quiet room	Moderately	Both ears, equally
Participant 322	30	Female	0	0	Constant: you can always or usually hear it in a quiet room	Moderately	Both ears, equally
Participant 323	35	Female	1	0	Constant: you can always or usually hear it in a quiet room	Slightly	Both ears, worse in right
Participant 324	28	Male	3	0	Constant: you can always or usually hear it in a quiet room	Moderately	Both ears, equally
Participant 325	25	Female	3	0	Intermittent: "comes and goes", cannot always hear it in a quiet room	Moderately	Both ears, equally
Participant 326	48	Female	1	0	Constant: you can always or usually hear it in a quiet room	Slightly	Both ears, equally
Participant 327	38	Female	0	0	Constant: you can always or usually hear it in a quiet room	Not at all	Do not know
Participant 328	67	Female	1	NaN	Constant: you can always or usually hear it in a quiet room	Moderately	Both ears, worse in right
Participant 329	45	Female	1	NaN	Constant: you can always or usually hear it in a quiet room	Slightly	Both ears, equally
Participant 330	23	Female	0	0	Constant: you can always or usually hear it in a quiet room	Moderately	Both ears, worse in left
Participant 331	37	Female	2	0	Constant: you can always or usually hear it in a quiet room	Slightly	Right ear
Participant 332	53	Female	1	0	Constant: you can always or usually hear it in a quiet room	Slightly	Inside the head
Participant 333	55	Male	1	0	Constant: you can always or usually hear it in a quiet room	Slightly	Right ear
Participant 334	29	Female	2	0	Intermittent: "comes and goes", cannot always hear it in a quiet room	Not at all	Do not know
Participant 335	39	Female	2	0	Constant: you can always or usually hear it in a quiet room	Moderately	Both ears, worse in left
Participant 336	50	Male	0	0	Constant: you can always or usually hear it in a quiet room	Slightly	Both ears, equally
Participant 337	41	Female	1	0	Constant: you can always or usually hear it in a quiet room	Moderately	Both ears, worse in right
Participant 338	33	Female	2	0	Constant: you can always or usually hear it in a quiet room	Moderately	Both ears, equally
Participant 339	45	Male	0	0	Intermittent: "comes and goes", cannot always hear it in a quiet room	Not at all	Other (please specify below)
Participant 340	37	Male	3	0	Constant: you can always or usually hear it in a quiet room	Slightly	Inside the head
Participant 341	55	Female	1	0	Constant: you can always or usually hear it in a quiet room	Severely	Right ear
Participant 342	56	Female	1	0	Constant: you can always or usually hear it in a quiet room	Moderately	Both ears, worse in right
Participant 343	46	Male	1	0	Constant: you can always or usually hear it in a quiet room	Slightly	Both ears, equally
Participant 344	51	Male	3	0	Intermittent: "comes and goes", cannot always hear it in a quiet room	Not at all	Inside the head
Participant 345	29	Female	2	0	Intermittent: "comes and goes", cannot always hear it in a quiet room	Slightly	Do not know
Participant 346	70	Female	3	0	Intermittent: "comes and goes", cannot always hear it in a quiet room	Slightly	Both ears, equally
Participant 347	33	Male	2	0	Intermittent: "comes and goes", cannot always hear it in a quiet room	Slightly	Both ears, worse in left
Participant 348	38	Male	1	0	Constant: you can always or usually hear it in a quiet room	Not at all	Both ears, equally
Participant 349	53	Male	1	0	Constant: you can always or usually hear it in a quiet room	Not at all	Both ears, equally
Participant 350	68	Female	3	0	Intermittent: "comes and goes", cannot always hear it in a quiet room	Not at all	Inside the head
Participant 351	40	Female	0	0	Constant: you can always or usually hear it in a quiet room	Slightly	Both ears, worse in left
Participant 352	31	Male	5	1	Constant: you can always or usually hear it in a quiet room	Not at all	Both ears, worse in right
Participant 353	54	Female	1	1	Constant: you can always or usually hear it in a quiet room	Moderately	Left ear
Participant 354	54	Male	3	0	Constant: you can always or usually hear it in a quiet room	Slightly	Do not know
Participant 355	43	Female	1	0	Constant: you can always or usually hear it in a quiet room	Not at all	Inside the head
Participant 356	35	Female	2	0	Intermittent: "comes and goes", cannot always hear it in a quiet room	Not at all	Left ear
Participant 357	33	Female	1	0	Intermittent: "comes and goes", cannot always hear it in a quiet room	Not at all	Both ears, worse in right
Participant 358	52	Female	2	0	Intermittent: "comes and goes", cannot always hear it in a quiet room	Moderately	Left ear
Participant 359	40	Female	4	0	Constant: you can always or usually hear it in a quiet room	Moderately	Left ear
Participant 360	45	Male	2	0	Constant: you can always or usually hear it in a quiet room	Moderately	Inside the head
Participant 361	46	Male	2	0	Intermittent: "comes and goes", cannot always hear it in a quiet room	Slightly	Both ears, equally
Participant 362	30	Male	1	NaN	Constant: you can always or usually hear it in a quiet room	Moderately	Both ears, worse in right
Participant 363	36	Male	1	0	Constant: you can always or usually hear it in a quiet room	Slightly	Right ear
Participant 364	33	Male	2	0	Intermittent: "comes and goes", cannot always hear it in a quiet room	Not at all	Both ears, worse in right
Participant 365	38	Female	1	0	Constant: you can always or usually hear it in a quiet room	Slightly	Both ears, worse in right
Participant 366	30	Male	1	0	Constant: you can always or usually hear it in a quiet room	Severely	Inside the head
Participant 367	49	Male	1	1	Constant: you can always or usually hear it in a quiet room	Moderately	Both ears, equally
Participant 368	53	Female	5	0	Constant: you can always or usually hear it in a quiet room	Moderately	Right ear
Participant 369	34	Male	1	0	Constant: you can always or usually hear it in a quiet room	Slightly	Both ears, worse in left
Participant 370	25	Male	0	0	Constant: you can always or usually hear it in a quiet room	Slightly	Both ears, equally
Participant 371	52	Female	0	0	Constant: you can always or usually hear it in a quiet room	Slightly	Both ears, equally
Participant 372	46	Male	2	0	Intermittent: "comes and goes", cannot always hear it in a quiet room	Slightly	Both ears, worse in right
Participant 373	33	Female	3	0	Intermittent: "comes and goes", cannot always hear it in a quiet room	Not at all	Both ears, equally
Participant 374	31	Male	1	0	Intermittent: "comes and goes", cannot always hear it in a quiet room	Slightly	Inside the head
Participant 375	23	Male	1	0	Constant: you can always or usually hear it in a quiet room	Slightly	Both ears, equally
Participant 376	42	Male	5	1	Intermittent: "comes and goes", cannot always hear it in a quiet room	Not at all	Both ears, equally
Participant 377	34	Male	2	0	Constant: you can always or usually hear it in a quiet room	Not at all	Inside the head
Participant 378	46	Male	1	0	Constant: you can always or usually hear it in a quiet room	Moderately	Both ears, worse in left
Participant 379	53	Female	0	0	Intermittent: "comes and goes", cannot always hear it in a quiet room	Slightly	Inside the head
Participant 380	37	Male			Intermittent: "comes and goes", cannot always hear it in a quiet room	Not at all	Left ear
Participant 381	29	Male	3	NaN	Constant: you can always or usually hear it in a quiet room	Not at all	Both ears, equally
Participant 382	57	Female	1	0	Constant: you can always or usually hear it in a quiet room	Severely	Inside the head
Participant 383	59	Female	2	0	Constant: you can always or usually hear it in a quiet room	Moderately	Right ear
Participant 384	48	Male	1	0	Intermittent: "comes and goes", cannot always hear it in a quiet room	Slightly	Inside the head
Participant 385	49	Male	2	0	Constant: you can always or usually hear it in a quiet room	Not at all	Both ears, worse in right
Participant 386	31	Female	NaN	NaN	Intermittent: "comes and goes", cannot always hear it in a quiet room	Moderately	Both ears, worse in right
Participant 387	30	Male	1	0	Constant: you can always or usually hear it in a quiet room	Moderately	Both ears, worse in right
Participant 388	39	Male	3	0	Constant: you can always or usually hear it in a quiet room	Not at all	Both ears, worse in right
Participant 389	56	Female	1	0	Intermittent: "comes and goes", cannot always hear it in a quiet room	Slightly	Both ears, worse in right
Participant 390	68	Female	0	0	Constant: you can always or usually hear it in a quiet room	Do not know	Left ear
Participant 391	36	Male	2	0	Constant: you can always or usually hear it in a quiet room	Moderately	Both ears, worse in right
Participant 392	33	Female	1	1	Constant: you can always or usually hear it in a quiet room	Slightly	Both ears, worse in left
Participant 393	43	Male	1	0	Intermittent: "comes and goes", cannot always hear it in a quiet room	Not at all	Do not know
Participant 394	41	Female	1	0	Constant: you can always or usually hear it in a quiet room	Slightly	Both ears, equally
Participant 395	50	Female	1	0	Intermittent: "comes and goes", cannot always hear it in a quiet room	Not at all	Left ear
Participant 396	52	Male	3	1	Intermittent: "comes and goes", cannot always hear it in a quiet room	Slightly	Inside the head
Participant 397	50	Male	1	0	Constant: you can always or usually hear it in a quiet room	Moderately	Inside the head
Participant 398	33	Male	4	0	Intermittent: "comes and goes", cannot always hear it in a quiet room	Slightly	Both ears, equally
Participant 399	28	Female	0	0	Intermittent: "comes and goes", cannot always hear it in a quiet room	Slightly	Both ears, equally
Participant 400	50	Male	0	0	Constant: you can always or usually hear it in a quiet room	Moderately	Both ears, worse in left
Participant 401	59	Female	1	0	Constant: you can always or usually hear it in a quiet room	Slightly	Both ears, equally
Participant 402	40	Female	0	0	Intermittent: "comes and goes", cannot always hear it in a quiet room	Slightly	Do not know
Participant 403	19	Male	1	0	Constant: you can always or usually hear it in a quiet room	Moderately	Both ears, equally
Participant 404	29	Female	2	0	Constant: you can always or usually hear it in a quiet room	Moderately	Both ears, equally
Participant 405	50	Male	2	0	Constant: you can always or usually hear it in a quiet room	Slightly	Both ears, worse in left
Participant 406	33	Male	0	0	Constant: you can always or usually hear it in a quiet room	Slightly	Inside the head
Participant 407	59	Male	NaN	NaN	Constant: you can always or usually hear it in a quiet room	Not at all	Both ears, equally
Participant 408	40	Female	1	0	Intermittent: "comes and goes", cannot always hear it in a quiet room	Not at all	Both ears, worse in right
Participant 409	51	Male	3	0	Constant: you can always or usually hear it in a quiet room	Slightly	Both ears, worse in right
Participant 410	43	Female	3	1	Intermittent: "comes and goes", cannot always hear it in a quiet room	Not at all	Both ears, equally
Participant 411	36	Male	1	0	Constant: you can always or usually hear it in a quiet room	Moderately	Do not know
Participant 412	38	Female	1	0	Intermittent: "comes and goes", cannot always hear it in a quiet room	Moderately	Inside the head
Participant 413	34	Female	2	1	Constant: you can always or usually hear it in a quiet room	Severely	Left ear
Participant 414	35	Male	2	0	Constant: you can always or usually hear it in a quiet room	Severely	Left ear
Participant 415	51	Female	3	0	Intermittent: "comes and goes", cannot always hear it in a quiet room	Not at all	Both ears, equally
Participant 416	40	Female	0	0	Constant: you can always or usually hear it in a quiet room	Moderately	Both ears, equally
Participant 417	32	Male	2	0	Constant: you can always or usually hear it in a quiet room	Slightly	Inside the head
Participant 418	39	Male	0	0	Constant: you can always or usually hear it in a quiet room	Do not know	Inside the head
Participant 419	48	Male	1	0	Constant: you can always or usually hear it in a quiet room	Moderately	Left ear
Participant 420	68	Male	2	1	Constant: you can always or usually hear it in a quiet room	Moderately	Both ears, equally
Participant 421	28	Male	2	0	Constant: you can always or usually hear it in a quiet room	Not at all	Both ears, equally
Participant 422	32	Male	3	NaN	Constant: you can always or usually hear it in a quiet room	Slightly	Inside the head
Participant 423	74	Female	1	NaN	Constant: you can always or usually hear it in a quiet room	Not at all	Both ears, worse in right
Participant 424	50	Female	3	0	Constant: you can always or usually hear it in a quiet room	Slightly	Left ear
Participant 425	72	Female	0	0	Intermittent: "comes and goes", cannot always hear it in a quiet room	Not at all	Do not know
Participant 426	33	Female	0	0	Intermittent: "comes and goes", cannot always hear it in a quiet room	Slightly	Both ears, worse in left
Participant 427	46	Female	1	0	Constant: you can always or usually hear it in a quiet room	Moderately	Both ears, worse in right
Participant 428	37	Male	3	0	Constant: you can always or usually hear it in a quiet room	Do not know	Both ears, equally
Participant 429	28	Male	1	0	Intermittent: "comes and goes", cannot always hear it in a quiet room	Not at all	Both ears, equally
Participant 430	35	Male	2	0	Intermittent: "comes and goes", cannot always hear it in a quiet room	Slightly	Both ears, equally
Participant 431	39	Male	1	0	Constant: you can always or usually hear it in a quiet room	Slightly	Left ear
Participant 432	42	Male	2	0	Intermittent: "comes and goes", cannot always hear it in a quiet room	Not at all	Right ear
Participant 433	42	Male	2	1	Intermittent: "comes and goes", cannot always hear it in a quiet room	Not at all	Both ears, equally
Participant 434	25	Female	1	0	Constant: you can always or usually hear it in a quiet room	Slightly	Right ear
Participant 435	28	Male	4	1	Constant: you can always or usually hear it in a quiet room	Moderately	Both ears, worse in right
Participant 436	34	Male	1	0	Constant: you can always or usually hear it in a quiet room	Severely	Both ears, worse in left
Participant 437	37	Female	1	0	Intermittent: "comes and goes", cannot always hear it in a quiet room	Moderately	Right ear
Participant 438	35	Male	2	0	Constant: you can always or usually hear it in a quiet room	Slightly	Both ears, equally
Participant 439	57	Male	3	1	Constant: you can always or usually hear it in a quiet room	Moderately	Inside the head
Participant 440	34	Male	1	0	Intermittent: "comes and goes", cannot always hear it in a quiet room	Not at all	Both ears, equally
Participant 441	49	Male	3	0	Intermittent: "comes and goes", cannot always hear it in a quiet room	Not at all	Inside the head
Participant 442	54	Female	0	0	Constant: you can always or usually hear it in a quiet room	Slightly	Both ears, worse in left
Participant 443	35	Male	1	0	Constant: you can always or usually hear it in a quiet room	Slightly	Both ears, equally
Participant 444	46	Male	0	0	Constant: you can always or usually hear it in a quiet room	Slightly	Both ears, equally
Participant 445	45	Male	1	0	Constant: you can always or usually hear it in a quiet room	Slightly	Both ears, equally
Participant 446	32	Male			Constant: you can always or usually hear it in a quiet room	Not at all	Left ear
Participant 447	37	Male	1	0	Constant: you can always or usually hear it in a quiet room	Moderately	Both ears, equally
Participant 448	52	Female	2	0	Constant: you can always or usually hear it in a quiet room	Do not know	Do not know
Participant 449	50	Female	2	1	Constant: you can always or usually hear it in a quiet room	Slightly	Inside the head
Participant 450	63	Female	3	0	Constant: you can always or usually hear it in a quiet room	Moderately	Both ears, worse in left
Participant 451	62	Female	2	0	Constant: you can always or usually hear it in a quiet room	Moderately	Other (please specify below)
Participant 452	40	Male	3	0	Constant: you can always or usually hear it in a quiet room	Not at all	Both ears, worse in right
Participant 453	44	Female	1	1	Constant: you can always or usually hear it in a quiet room	Slightly	Other (please specify below)
Participant 454	32	Male	0	0	Constant: you can always or usually hear it in a quiet room	Not at all	Inside the head
Participant 455	30	Female	3	NaN	Intermittent: "comes and goes", cannot always hear it in a quiet room	Slightly	Both ears, worse in right
Participant 456	69	Female	1	0	Constant: you can always or usually hear it in a quiet room	Moderately	Inside the head
Participant 457	68	Male	1	NaN	Intermittent: "comes and goes", cannot always hear it in a quiet room	Slightly	Right ear
Participant 458	54	Female	1	0	Constant: you can always or usually hear it in a quiet room	Slightly	Inside the head
Participant 459	66	Female	3	0	Intermittent: "comes and goes", cannot always hear it in a quiet room	Slightly	Both ears, equally
Participant 460	49	Female	2	0	Constant: you can always or usually hear it in a quiet room	Severely	Both ears, equally
Participant 461	54	Male	2	0	Intermittent: "comes and goes", cannot always hear it in a quiet room	Not at all	Both ears, equally
Participant 462	29	Female	2	0	Constant: you can always or usually hear it in a quiet room	Moderately	Both ears, equally
Participant 463	56	Female	1	0	Constant: you can always or usually hear it in a quiet room	Severely	Left ear
Participant 464	36	Male	2	0	Intermittent: "comes and goes", cannot always hear it in a quiet room	Not at all	Both ears, equally
Participant 465	57	Female	2	1	Constant: you can always or usually hear it in a quiet room	Slightly	Both ears, equally
Participant 466	40	Female	2	0	Intermittent: "comes and goes", cannot always hear it in a quiet room	Moderately	Both ears, equally
Participant 467	43	Female	1	0	Constant: you can always or usually hear it in a quiet room	Not at all	Both ears, equally
Participant 468	47	Male	0	0	Constant: you can always or usually hear it in a quiet room	Not at all	Both ears, worse in left
Participant 469	34	Female	1	0	Constant: you can always or usually hear it in a quiet room	Not at all	Right ear
Participant 470	40	Female	1	0	Intermittent: "comes and goes", cannot always hear it in a quiet room	Not at all	Both ears, worse in right
Participant 471	39	Female	3	0	Intermittent: "comes and goes", cannot always hear it in a quiet room	Slightly	Right ear
Participant 472	69	Female	2	NaN	Intermittent: "comes and goes", cannot always hear it in a quiet room	Not at all	Right ear
Participant 473	67	Female	0	NaN	Constant: you can always or usually hear it in a quiet room	Severely	Both ears, equally
Participant 474	29	Female	1	1	Constant: you can always or usually hear it in a quiet room	Slightly	Right ear
Participant 475	58	Female	4	0	Constant: you can always or usually hear it in a quiet room	Not at all	Both ears, worse in left
Participant 476	30	Female	1	1	Constant: you can always or usually hear it in a quiet room	Slightly	Both ears, equally
Participant 477	26	Male			Constant: you can always or usually hear it in a quiet room	Moderately	Inside the head
Participant 478	31	Female	2	0	Constant: you can always or usually hear it in a quiet room	Slightly	Both ears, equally
Participant 479	71	Female	2	0	Intermittent: "comes and goes", cannot always hear it in a quiet room	Do not know	Both ears, equally
Participant 480	25	Male	0	0	Constant: you can always or usually hear it in a quiet room	Slightly	Right ear
Participant 481	27	Female	0	0	Constant: you can always or usually hear it in a quiet room	Moderately	Both ears, equally
Participant 482	39	Female	3	NaN	Intermittent: "comes and goes", cannot always hear it in a quiet room	Severely	Both ears, equally
Participant 483	52	Female	3	1	Intermittent: "comes and goes", cannot always hear it in a quiet room	Not at all	Inside the head
Participant 484	53	Female	2	0	Constant: you can always or usually hear it in a quiet room	Severely	Both ears, equally
Participant 485	50	Female	3	0	Intermittent: "comes and goes", cannot always hear it in a quiet room	Slightly	Inside the head
Participant 486	42	Male	1	0	Constant: you can always or usually hear it in a quiet room	Slightly	Left ear
Participant 487	34	Male	2	0	Constant: you can always or usually hear it in a quiet room	Slightly	Inside the head
Participant 488	47	Male	3	0	Intermittent: "comes and goes", cannot always hear it in a quiet room	Slightly	Both ears, equally
Participant 489	54	Female	2	0	Constant: you can always or usually hear it in a quiet room	Not at all	Inside the head
Participant 490	38	Female	2	0	Constant: you can always or usually hear it in a quiet room	Slightly	Both ears, equally
Participant 491	45	Male	3	0	Constant: you can always or usually hear it in a quiet room	Not at all	Inside the head
Participant 492	35	Female	1	1	Intermittent: "comes and goes", cannot always hear it in a quiet room	Moderately	Both ears, worse in right
Participant 493	59	Female	2	NaN	Constant: you can always or usually hear it in a quiet room	Moderately	Both ears, equally
Participant 494	30	Male	1	0	Constant: you can always or usually hear it in a quiet room	Severely	Both ears, equally
Participant 495	34	Female	1	0	Constant: you can always or usually hear it in a quiet room	Not at all	Both ears, worse in right
Participant 496	36	Male	2	0	Constant: you can always or usually hear it in a quiet room	Moderately	Both ears, worse in left
Participant 497	33	Male	1	0	Intermittent: "comes and goes", cannot always hear it in a quiet room	Not at all	Right ear
Participant 498	30	Male	3	1	Constant: you can always or usually hear it in a quiet room	Slightly	Both ears, worse in right
Participant 499	57	Male	3	0	Constant: you can always or usually hear it in a quiet room	Slightly	Both ears, equally
Participant 500	59	Female	1	0	Intermittent: "comes and goes", cannot always hear it in a quiet room	Not at all	Left ear
Participant 501	52	Female	3	0	Constant: you can always or usually hear it in a quiet room	Moderately	Both ears, equally
Participant 502	46	Male	1	0	Constant: you can always or usually hear it in a quiet room	Slightly	Both ears, equally
Participant 503	50	Female	2	0	Intermittent: "comes and goes", cannot always hear it in a quiet room	Not at all	Do not know
Participant 504	67	Female	1	NaN	Constant: you can always or usually hear it in a quiet room	Moderately	Left ear
Participant 505	32	Male	1	0	Intermittent: "comes and goes", cannot always hear it in a quiet room	Slightly	Both ears, equally
Participant 506	61	Female	NaN	NaN	Constant: you can always or usually hear it in a quiet room	Slightly	Both ears, worse in right
Participant 507	57	Male	3	0	Constant: you can always or usually hear it in a quiet room	Moderately	Both ears, equally
Participant 508	34	Male	2	0	Constant: you can always or usually hear it in a quiet room	Slightly	Left ear
Participant 509	54	Female	2	1	Intermittent: "comes and goes", cannot always hear it in a quiet room	Moderately	Right ear
Participant 510	31	Female	2	1	Constant: you can always or usually hear it in a quiet room	Slightly	Right ear
Participant 511	46	Male	3	1	Constant: you can always or usually hear it in a quiet room	Moderately	Both ears, equally
Participant 512	71	Female	1	0	Constant: you can always or usually hear it in a quiet room	Slightly	Both ears, worse in left
Participant 513	47	Female	1	0	Intermittent: "comes and goes", cannot always hear it in a quiet room	Moderately	Left ear
Participant 514	39	Female	8	0	Intermittent: "comes and goes", cannot always hear it in a quiet room	Moderately	Both ears, equally
Participant 515	49	Male	2	0	Constant: you can always or usually hear it in a quiet room	Moderately	Both ears, worse in left
Participant 516	37	Male	0	0	Intermittent: "comes and goes", cannot always hear it in a quiet room	Severely	Left ear
Participant 517	55	Male	1	NaN	Intermittent: "comes and goes", cannot always hear it in a quiet room	Moderately	Both ears, worse in left
Participant 518	71	Female	0	0	Constant: you can always or usually hear it in a quiet room	Not at all	Inside the head
Participant 519	43	Male	1	0	Constant: you can always or usually hear it in a quiet room	Moderately	Both ears, worse in right
Participant 520	55	Male	2	0	Constant: you can always or usually hear it in a quiet room	Moderately	Both ears, equally
Participant 521	40	Male	1	0	Intermittent: "comes and goes", cannot always hear it in a quiet room	Not at all	Right ear
Participant 522	26	Female	2	0	Intermittent: "comes and goes", cannot always hear it in a quiet room	Not at all	Both ears, equally
Participant 523	30	Female	0	NaN	Constant: you can always or usually hear it in a quiet room	Slightly	Both ears, worse in left
Participant 524	55	Female	1	0	Constant: you can always or usually hear it in a quiet room	Moderately	Both ears, worse in left
Participant 525	39	Male	1	0	Constant: you can always or usually hear it in a quiet room	Moderately	Left ear
Participant 526	32	Male	4	0	Intermittent: "comes and goes", cannot always hear it in a quiet room	Not at all	Both ears, equally
Participant 527	35	Female	1	0	Intermittent: "comes and goes", cannot always hear it in a quiet room	Moderately	Both ears, equally
Participant 528	53	Female	2	0	Intermittent: "comes and goes", cannot always hear it in a quiet room	Not at all	Both ears, equally
Participant 529	50	Female	1	0	Constant: you can always or usually hear it in a quiet room	Slightly	Left ear
Participant 530	31	Female	2	2	Intermittent: "comes and goes", cannot always hear it in a quiet room	Slightly	Do not know
Participant 531	71	Male	1	0	Constant: you can always or usually hear it in a quiet room	Do not know	Both ears, equally
Participant 532	52	Male			Intermittent: "comes and goes", cannot always hear it in a quiet room	Not at all	Both ears, equally
Participant 533	43	Male	0	0	Constant: you can always or usually hear it in a quiet room	Moderately	Both ears, equally
Participant 534	56	Female	2	0	Constant: you can always or usually hear it in a quiet room	Moderately	Both ears, equally
Participant 535	37	Female	1	NaN	Constant: you can always or usually hear it in a quiet room	Slightly	Both ears, worse in right
Participant 536	48	Female	NaN	NaN	Constant: you can always or usually hear it in a quiet room	Moderately	Both ears, worse in right
Participant 537	39	Male	1	0	Constant: you can always or usually hear it in a quiet room	Slightly	Both ears, worse in left
Participant 538	48	Female	4	1	Constant: you can always or usually hear it in a quiet room	Slightly	Both ears, worse in right
Participant 539	55	Male	2	0	Constant: you can always or usually hear it in a quiet room	Moderately	Both ears, worse in left
Participant 540	31	Female	1	0	Constant: you can always or usually hear it in a quiet room	Moderately	Both ears, equally
Participant 541	53	Female	1	0	Constant: you can always or usually hear it in a quiet room	Not at all	Both ears, worse in right
Participant 542	40	Female	1	0	Intermittent: "comes and goes", cannot always hear it in a quiet room	Not at all	Both ears, equally
Participant 543	34	Female	2	2	Constant: you can always or usually hear it in a quiet room	Moderately	Left ear
Participant 544	61	Male	1	1	Intermittent: "comes and goes", cannot always hear it in a quiet room	Moderately	Both ears, worse in right
Participant 545	63	Female	3	0	Constant: you can always or usually hear it in a quiet room	Slightly	Right ear
Participant 546	55	Female	1	NaN	Intermittent: "comes and goes", cannot always hear it in a quiet room	Not at all	Do not know
Participant 547	25	Male	3	0	Intermittent: "comes and goes", cannot always hear it in a quiet room	Moderately	Both ears, worse in left
Participant 548	31	Female	1	0	Constant: you can always or usually hear it in a quiet room	Moderately	Both ears, worse in right
Participant 549	56	Female	0	0	Constant: you can always or usually hear it in a quiet room	Moderately	Both ears, worse in left
Participant 550	70	Female	1	1	Constant: you can always or usually hear it in a quiet room	Slightly	Both ears, worse in left
Participant 551	72	Male	3	0	Intermittent: "comes and goes", cannot always hear it in a quiet room	Not at all	Do not know
Participant 552	27	Female	1	0	Intermittent: "comes and goes", cannot always hear it in a quiet room	Slightly	Do not know
Participant 553	32	Female	4	0	Constant: you can always or usually hear it in a quiet room	Severely	Left ear
Participant 554	35	Female	4	0	Constant: you can always or usually hear it in a quiet room	Not at all	Both ears, worse in right
Participant 555	48	Male	1	1	Constant: you can always or usually hear it in a quiet room	Slightly	Both ears, worse in left
Participant 556	46	Female			Intermittent: "comes and goes", cannot always hear it in a quiet room	Not at all	Inside the head
Participant 557	31	Male			Intermittent: "comes and goes", cannot always hear it in a quiet room	Severely	Both ears, equally
Participant 558	27	Male	5	1	Constant: you can always or usually hear it in a quiet room	Not at all	Both ears, equally
Participant 559	34	Female	5	0	Intermittent: "comes and goes", cannot always hear it in a quiet room	Moderately	Both ears, worse in left
Participant 560	71	Male	3	0	Constant: you can always or usually hear it in a quiet room	Not at all	Both ears, worse in left
Participant 561	43	Female	3	0	Intermittent: "comes and goes", cannot always hear it in a quiet room	Slightly	Inside the head
Participant 562	45	Male	3	0	Intermittent: "comes and goes", cannot always hear it in a quiet room	Not at all	Both ears, equally
Participant 563	43	Female	3	0	Constant: you can always or usually hear it in a quiet room	Severely	Inside the head
Participant 564	50	Male	3	0	Constant: you can always or usually hear it in a quiet room	Moderately	Both ears, equally
Participant 565	51	Female	3	2	Constant: you can always or usually hear it in a quiet room	Slightly	Both ears, worse in right
Participant 566	35	Female	2	0	Constant: you can always or usually hear it in a quiet room	Not at all	Both ears, worse in right
Participant 567	33	Female	0	0	Constant: you can always or usually hear it in a quiet room	Slightly	Both ears, worse in right
Participant 568	50	Male	4	0	Constant: you can always or usually hear it in a quiet room	Severely	Both ears, equally
Participant 569	30	Male	1	0	Constant: you can always or usually hear it in a quiet room	Not at all	Inside the head
Participant 570	75	Female	1	0	Constant: you can always or usually hear it in a quiet room	Not at all	Both ears, worse in right
Participant 571	30	Female	3	0	Intermittent: "comes and goes", cannot always hear it in a quiet room	Not at all	Both ears, equally
Participant 572	47	Male	3	0	Constant: you can always or usually hear it in a quiet room	Not at all	Inside the head
Participant 573	60	Female	1	0	Constant: you can always or usually hear it in a quiet room	Moderately	Inside the head
Participant 574	37	Male	2	0	Constant: you can always or usually hear it in a quiet room	Not at all	Both ears, equally
Participant 575	27	Female	1	0	Intermittent: "comes and goes", cannot always hear it in a quiet room	Moderately	Both ears, worse in right
Participant 576	30	Female	2	0	Intermittent: "comes and goes", cannot always hear it in a quiet room	Not at all	Both ears, equally
Participant 577	33	Male	1	0	Constant: you can always or usually hear it in a quiet room	Severely	Both ears, worse in right
Participant 578	60	Male	2	0	Constant: you can always or usually hear it in a quiet room	Slightly	Both ears, worse in right
Participant 579	49	Female	2	0	Constant: you can always or usually hear it in a quiet room	Not at all	Both ears, equally
Participant 580	40	Male	2	0	Constant: you can always or usually hear it in a quiet room	Not at all	Left ear
Participant 581	39	Male	1	0	Constant: you can always or usually hear it in a quiet room	Slightly	Both ears, equally
Participant 582	56	Male	3	0	Constant: you can always or usually hear it in a quiet room	Not at all	Both ears, equally
Participant 583	39	Female	1	0	Constant: you can always or usually hear it in a quiet room	Slightly	Left ear
Participant 584	54	Male	NaN	NaN	Constant: you can always or usually hear it in a quiet room	Not at all	Both ears, worse in left
Participant 585	32	Male	1	NaN	Intermittent: "comes and goes", cannot always hear it in a quiet room	Not at all	Both ears, worse in left
Participant 586	47	Male	2	0	Constant: you can always or usually hear it in a quiet room	Slightly	Both ears, worse in left
Participant 587	48	Female	1	0	Intermittent: "comes and goes", cannot always hear it in a quiet room	Slightly	Both ears, worse in right
Participant 588	52	Female	0	NaN	Constant: you can always or usually hear it in a quiet room	Moderately	Right ear
Participant 589	58	Male	NaN	0	Constant: you can always or usually hear it in a quiet room	Slightly	Both ears, worse in left
Participant 590	28	Male	1	0	Constant: you can always or usually hear it in a quiet room	Moderately	Both ears, worse in right
Participant 591	40	Male	2	0	Constant: you can always or usually hear it in a quiet room	Moderately	Both ears, equally
Participant 592	62	Male	5	0	Constant: you can always or usually hear it in a quiet room	Moderately	Both ears, equally
Participant 593	55	Male	1	NaN	Constant: you can always or usually hear it in a quiet room	Severely	Both ears, equally
Participant 594	48	Male	2	0	Intermittent: "comes and goes", cannot always hear it in a quiet room	Severely	Other (please specify below)
Participant 595	26	Male	1	NaN	Constant: you can always or usually hear it in a quiet room	Moderately	Both ears, worse in right
Participant 596	38	Male	4	NaN	Intermittent: "comes and goes", cannot always hear it in a quiet room	Moderately	Both ears, equally
Participant 597	55	Male	0	0	Constant: you can always or usually hear it in a quiet room	Moderately	Inside the head
Participant 598	50	Female	2	2	Constant: you can always or usually hear it in a quiet room	Slightly	Inside the head
Participant 599	65	Female	0	0	Constant: you can always or usually hear it in a quiet room	Severely	Right ear
Participant 600	28	Male	0	0	Constant: you can always or usually hear it in a quiet room	Moderately	Left ear
Participant 601	29	Male	4	0	Constant: you can always or usually hear it in a quiet room	Slightly	Both ears, equally
Participant 602	48	Male	1	0	Constant: you can always or usually hear it in a quiet room	Moderately	Inside the head
Participant 603	56	Male	1	NaN	Constant: you can always or usually hear it in a quiet room	Severely	Inside the head
Participant 604	38	Male	2	1	Constant: you can always or usually hear it in a quiet room	Severely	Both ears, worse in right
Participant 605	55	Male	1	NaN	Constant: you can always or usually hear it in a quiet room	Severely	Both ears, equally
Participant 606	44	Male	3	0	Intermittent: "comes and goes", cannot always hear it in a quiet room	Not at all	Both ears, equally
Participant 607	45	Male	3	NaN	Constant: you can always or usually hear it in a quiet room	Moderately	Both ears, worse in left
Participant 608	72	Female	2	0	Constant: you can always or usually hear it in a quiet room	Moderately	Both ears, equally
Participant 609	38	Male	1	0	Intermittent: "comes and goes", cannot always hear it in a quiet room	Not at all	Inside the head
Participant 610	51	Female	1	NaN	Constant: you can always or usually hear it in a quiet room	Severely	Left ear
Participant 611	40	Male	3	1	Constant: you can always or usually hear it in a quiet room	Severely	Other (please specify below)
Participant 612	50	Male	3	0	Constant: you can always or usually hear it in a quiet room	Do not know	Both ears, worse in right
Participant 613	28	Female	2	1	Constant: you can always or usually hear it in a quiet room	Severely	Both ears, worse in right
Participant 614	46	Male	0	0	Constant: you can always or usually hear it in a quiet room	Slightly	Both ears, equally
Participant 615	59	Male	2	0	Constant: you can always or usually hear it in a quiet room	Slightly	Both ears, equally
Participant 616	28	Male			Intermittent: "comes and goes", cannot always hear it in a quiet room	Slightly	Both ears, worse in left
Participant 617	54	Female	4	1	Intermittent: "comes and goes", cannot always hear it in a quiet room	Moderately	Both ears, worse in right
Participant 618	46	Male	1	0	Constant: you can always or usually hear it in a quiet room	Moderately	Both ears, worse in left
Participant 619	75	Male	0	0	Constant: you can always or usually hear it in a quiet room	Moderately	Both ears, worse in left
Participant 620	33	Male	4	0	Constant: you can always or usually hear it in a quiet room	Severely	Other (please specify below)
Participant 621	50	Male	1	0	Constant: you can always or usually hear it in a quiet room	Severely	Both ears, equally
Participant 622	39	Male	1	0	Constant: you can always or usually hear it in a quiet room	Not at all	Both ears, equally
Participant 623	63	Female	0	0	Constant: you can always or usually hear it in a quiet room	Not at all	Left ear
Participant 624	20	Male	1	1	Constant: you can always or usually hear it in a quiet room	Severely	Left ear
Participant 625	65	Male	1	0	Constant: you can always or usually hear it in a quiet room	Moderately	Left ear
Participant 626	31	Male	0	0	Constant: you can always or usually hear it in a quiet room	Moderately	Both ears, worse in left
Participant 627	57	Male	3	0	Constant: you can always or usually hear it in a quiet room	Severely	Left ear
Participant 628	45	Female	3	1	Constant: you can always or usually hear it in a quiet room	Severely	Both ears, worse in right
Participant 629	61	Female	3	3	Constant: you can always or usually hear it in a quiet room	Moderately	Both ears, worse in right
Participant 630	51	Male	0	0	Intermittent: "comes and goes", cannot always hear it in a quiet room	Moderately	Both ears, equally
Participant 631	39	Male	2	0	Constant: you can always or usually hear it in a quiet room	Severely	Inside the head
Participant 632	64	Male	1	1	Constant: you can always or usually hear it in a quiet room	Moderately	Both ears, worse in right
Participant 633	50	Female	2	0	Constant: you can always or usually hear it in a quiet room	Moderately	Right ear
Participant 634	46	Male	2	0	Constant: you can always or usually hear it in a quiet room	Moderately	Both ears, equally
Participant 635	55	Male	0	0	Constant: you can always or usually hear it in a quiet room	Slightly	Both ears, worse in left
Participant 636	59	Male	1	0	Constant: you can always or usually hear it in a quiet room	Moderately	Other (please specify below)
Participant 637	67	Male	2	0	Constant: you can always or usually hear it in a quiet room	Slightly	Both ears, equally
Participant 638	47	Male	1	0	Constant: you can always or usually hear it in a quiet room	Moderately	Right ear
Participant 639	39	Male	6	0	Constant: you can always or usually hear it in a quiet room	Moderately	Both ears, worse in left
Participant 640	54	Male	3	1	Constant: you can always or usually hear it in a quiet room	Slightly	Both ears, worse in left
Participant 641	62	Male	2	0	Constant: you can always or usually hear it in a quiet room	Severely	Both ears, worse in right
Participant 642	49	Female	2	NaN	Constant: you can always or usually hear it in a quiet room	Slightly	Both ears, worse in left
Participant 643	30	Female	1	0	Constant: you can always or usually hear it in a quiet room	Moderately	Both ears, worse in right
Participant 644	28	Male	1	0	Intermittent: "comes and goes", cannot always hear it in a quiet room	Not at all	Inside the head
Participant 645	55	Male	3	1	Constant: you can always or usually hear it in a quiet room	Not at all	Both ears, equally
Participant 646	52	Female	2	0	Constant: you can always or usually hear it in a quiet room	Moderately	Left ear
Participant 647	24	Male	1	0	Constant: you can always or usually hear it in a quiet room	Severely	Both ears, equally
Participant 648	61	Female	2	0	Constant: you can always or usually hear it in a quiet room	Severely	Both ears, worse in right
Participant 649	42	Male	1	0	Constant: you can always or usually hear it in a quiet room	Moderately	Inside the head
Participant 650	33	Male	2	0	Constant: you can always or usually hear it in a quiet room	Severely	Both ears, worse in left
Participant 651	31	Female	0	0	Constant: you can always or usually hear it in a quiet room	Moderately	Both ears, worse in left
Participant 652	51	Male	1	0	Constant: you can always or usually hear it in a quiet room	Slightly	Both ears, worse in left
Participant 653	29	Male	3	1	Constant: you can always or usually hear it in a quiet room	Severely	Both ears, worse in right
Participant 654	43	Female	1	0	Constant: you can always or usually hear it in a quiet room	Moderately	Right ear
Participant 655	49	Female	1	0	Constant: you can always or usually hear it in a quiet room	Moderately	Both ears, worse in left
Participant 656	66	Female	2	0	Constant: you can always or usually hear it in a quiet room	Moderately	Right ear
Participant 657	64	Male	5	0	Constant: you can always or usually hear it in a quiet room	Severely	Left ear
Participant 658	33	Male	3	0	Constant: you can always or usually hear it in a quiet room	Moderately	Both ears, worse in left
Participant 659	74	Male	1	0	Constant: you can always or usually hear it in a quiet room	Slightly	Both ears, worse in right
Participant 660	25	Male	2	0	Constant: you can always or usually hear it in a quiet room	Slightly	Both ears, worse in left
Participant 661	52	Female	3	0	Constant: you can always or usually hear it in a quiet room	Slightly	Both ears, worse in left
Participant 662	33	Female	NaN	NaN	Constant: you can always or usually hear it in a quiet room	Not at all	Inside the head
Participant 663	54	Female	1	0	Intermittent: "comes and goes", cannot always hear it in a quiet room	Moderately	Both ears, equally
Participant 664	34	Male	5	0	Constant: you can always or usually hear it in a quiet room	Moderately	Both ears, worse in right
Participant 665	49	Male	1	0	Constant: you can always or usually hear it in a quiet room	Severely	Inside the head
Participant 666	69	Male	12	NaN	Constant: you can always or usually hear it in a quiet room	Slightly	Both ears, worse in left
Participant 667	49	Female	1	0	Constant: you can always or usually hear it in a quiet room	Not at all	Left ear
Participant 668	38	Male	0	0	Constant: you can always or usually hear it in a quiet room	Slightly	Both ears, equally
Participant 669	21	Male	1	1	Constant: you can always or usually hear it in a quiet room	Slightly	Both ears, worse in right
Participant 670	37	Female	1	0	Intermittent: "comes and goes", cannot always hear it in a quiet room	Slightly	Do not know
Participant 671	55	Female	1	0	Constant: you can always or usually hear it in a quiet room	Severely	Both ears, worse in left
Participant 672	70	Male	2	0	Constant: you can always or usually hear it in a quiet room	Severely	Left ear
Participant 673	31	Male	1	0	Constant: you can always or usually hear it in a quiet room	Slightly	Left ear
Participant 674	56	Female	1	0	Constant: you can always or usually hear it in a quiet room	Not at all	Both ears, worse in left
Participant 675	66	Female	NaN	NaN	Constant: you can always or usually hear it in a quiet room	Severely	Both ears, worse in left
Participant 676	38	Female	1	0	Constant: you can always or usually hear it in a quiet room	Moderately	Both ears, equally
Participant 677	65	Female	3	NaN	Intermittent: "comes and goes", cannot always hear it in a quiet room	Moderately	Both ears, equally
Participant 678	32	Male	1	0	Constant: you can always or usually hear it in a quiet room	Moderately	Both ears, worse in right
Participant 679	25	Male	1	NaN	Constant: you can always or usually hear it in a quiet room	Slightly	Both ears, equally
Participant 680	51	Female	NaN	NaN	Constant: you can always or usually hear it in a quiet room	Slightly	Both ears, worse in left
Participant 681	53	Male	4	0	Intermittent: "comes and goes", cannot always hear it in a quiet room	Not at all	Inside the head
Participant 682	35	Female	1	0	Constant: you can always or usually hear it in a quiet room	Moderately	Both ears, equally
Participant 683	37	Male	1	0	Constant: you can always or usually hear it in a quiet room	Slightly	Both ears, equally
Participant 684	44	Male	1	0	Constant: you can always or usually hear it in a quiet room	Slightly	Left ear
Participant 685	42	Male	2	1	Constant: you can always or usually hear it in a quiet room	Severely	Both ears, equally
Participant 686	51	Female	3	0	Intermittent: "comes and goes", cannot always hear it in a quiet room	Not at all	Both ears, equally
Participant 687	51	Male	1	0	Intermittent: "comes and goes", cannot always hear it in a quiet room	Moderately	Both ears, equally
Participant 688	78	Male	3	0	Constant: you can always or usually hear it in a quiet room	Severely	Both ears, equally
Participant 689	45	Male	1	0	Constant: you can always or usually hear it in a quiet room	Moderately	Both ears, equally
Participant 690	43	Male	1	0	Constant: you can always or usually hear it in a quiet room	Severely	Both ears, equally
Participant 691	54	Male	3	0	Constant: you can always or usually hear it in a quiet room	Severely	Both ears, worse in right
Participant 692	33	Male	1	0	Constant: you can always or usually hear it in a quiet room	Not at all	Both ears, equally
Participant 693	41	Female	1	0	Intermittent: "comes and goes", cannot always hear it in a quiet room	Moderately	Both ears, worse in left
Participant 694	43	Male	1	0	Constant: you can always or usually hear it in a quiet room	Moderately	Both ears, worse in right
Participant 695	76	Female	1	NaN	Constant: you can always or usually hear it in a quiet room	Slightly	Left ear
Participant 696	56	Female	2	1	Constant: you can always or usually hear it in a quiet room	Severely	Left ear
Participant 697	48	Male	1	NaN	Intermittent: "comes and goes", cannot always hear it in a quiet room	Moderately	Inside the head
Participant 698	33	Male	2	0	Constant: you can always or usually hear it in a quiet room	Moderately	Both ears, equally
Participant 699	33	Female	2	1	Constant: you can always or usually hear it in a quiet room	Slightly	Both ears, worse in left
Participant 700	67	Female	1	0	Constant: you can always or usually hear it in a quiet room	Severely	Both ears, equally
Participant 701	36	Male	3	0	Constant: you can always or usually hear it in a quiet room	Slightly	Both ears, worse in right
Participant 702	53	Female	0	NaN	Constant: you can always or usually hear it in a quiet room	Not at all	Both ears, worse in left
Participant 703	49	Male	0	0	Constant: you can always or usually hear it in a quiet room	Slightly	Both ears, equally
Participant 704	56	Female	2	0	Intermittent: "comes and goes", cannot always hear it in a quiet room	Not at all	Both ears, equally
Participant 705	61	Male	1	NaN	Constant: you can always or usually hear it in a quiet room	Moderately	Both ears, worse in left
Participant 706	55	Male	2	1	Constant: you can always or usually hear it in a quiet room	Severely	Both ears, worse in right
Participant 707	37	Male	3	0	Constant: you can always or usually hear it in a quiet room	Slightly	Both ears, equally
Participant 708	48	Male	0	0	Constant: you can always or usually hear it in a quiet room	Not at all	Inside the head
Participant 709	33	Male	3	0	Intermittent: "comes and goes", cannot always hear it in a quiet room	Not at all	Both ears, worse in right
Participant 710	60	Male	4	0	Intermittent: "comes and goes", cannot always hear it in a quiet room	Slightly	Both ears, equally
Participant 711	26	Male	2	0	Intermittent: "comes and goes", cannot always hear it in a quiet room	Slightly	Both ears, worse in left
Participant 712	47	Male	1	NaN	Constant: you can always or usually hear it in a quiet room	Severely	Both ears, equally
Participant 713	42	Male	3	0	Constant: you can always or usually hear it in a quiet room	Severely	Both ears, worse in right
Participant 714	37	Female	1	0	Constant: you can always or usually hear it in a quiet room	Moderately	Both ears, worse in right
Participant 715	58	Female	0	0	Constant: you can always or usually hear it in a quiet room	Moderately	Both ears, worse in right
Participant 716	35	Male	1	NaN	Constant: you can always or usually hear it in a quiet room	Slightly	Both ears, worse in right
Participant 717	36	Male	2	0	Constant: you can always or usually hear it in a quiet room	Slightly	Left ear
Participant 718	69	Female	2	NaN	Intermittent: "comes and goes", cannot always hear it in a quiet room	Not at all	Inside the head
Participant 719	37	Male	1	0	Intermittent: "comes and goes", cannot always hear it in a quiet room	Not at all	Inside the head
Participant 720	70	Female	NaN	NaN	Intermittent: "comes and goes", cannot always hear it in a quiet room	Slightly	Inside the head
Participant 721	31	Female	3	0	Constant: you can always or usually hear it in a quiet room	Not at all	Inside the head
Participant 722	24	Male	3	0	Constant: you can always or usually hear it in a quiet room	Moderately	Both ears, equally
Participant 723	55	Male	1	0	Constant: you can always or usually hear it in a quiet room	Slightly	Both ears, worse in right
Participant 724	48	Female	4	0	Constant: you can always or usually hear it in a quiet room	Moderately	Both ears, worse in left
Participant 725	29	Male	2	1	Intermittent: "comes and goes", cannot always hear it in a quiet room	Slightly	Right ear
Participant 726	36	Male	2	0	Constant: you can always or usually hear it in a quiet room	Severely	Both ears, worse in left
Participant 727	47	Female	2	0	Constant: you can always or usually hear it in a quiet room	Slightly	Both ears, worse in left
Participant 728	72	Female	3	0	Intermittent: "comes and goes", cannot always hear it in a quiet room	Slightly	Inside the head
Participant 729	29	Female	3	0	Intermittent: "comes and goes", cannot always hear it in a quiet room	Slightly	Inside the head
Participant 730	46	Female	4	0	Intermittent: "comes and goes", cannot always hear it in a quiet room	Not at all	Inside the head
Participant 731	51	Female			Constant: you can always or usually hear it in a quiet room	Moderately	Inside the head
Participant 732	48	Female			Constant: you can always or usually hear it in a quiet room	Slightly	Inside the head
Participant 733	75	Female	1	NaN	Intermittent: "comes and goes", cannot always hear it in a quiet room	Slightly	Left ear
Participant 734	61	Female			Intermittent: "comes and goes", cannot always hear it in a quiet room	Slightly	Right ear
Participant 735	44	Male	2	0	Constant: you can always or usually hear it in a quiet room	Slightly	Both ears, equally
Participant 736	44	Male	1	0	Constant: you can always or usually hear it in a quiet room	Slightly	Both ears, worse in left
Participant 737	62	Male	2	0	Intermittent: "comes and goes", cannot always hear it in a quiet room	Not at all	Both ears, worse in right
Participant 738	64	Female	1	NaN	Constant: you can always or usually hear it in a quiet room	Moderately	Right ear
Participant 739	50	Female	0	0	Intermittent: "comes and goes", cannot always hear it in a quiet room	Slightly	Both ears, equally
Participant 740	48	Female	1	0	Intermittent: "comes and goes", cannot always hear it in a quiet room	Slightly	Right ear
Participant 741	29	Male	2	0	Constant: you can always or usually hear it in a quiet room	Moderately	Both ears, worse in right
Participant 742	30	Male	2	1	Constant: you can always or usually hear it in a quiet room	Slightly	Both ears, worse in right
Participant 743	39	Female	3	1	Intermittent: "comes and goes", cannot always hear it in a quiet room	Moderately	Left ear
Participant 744	33	Male	3	0	Intermittent: "comes and goes", cannot always hear it in a quiet room	Not at all	Both ears, equally
Participant 745	48	Female	2	0	Constant: you can always or usually hear it in a quiet room	Moderately	Both ears, worse in left
Participant 746	67	Male	0	0	Intermittent: "comes and goes", cannot always hear it in a quiet room	Do not know	Both ears, equally
Participant 747	32	Female	1	0	Constant: you can always or usually hear it in a quiet room	Not at all	Both ears, equally
Participant 748	64	Female	3	NaN	Intermittent: "comes and goes", cannot always hear it in a quiet room	Slightly	Both ears, equally
Participant 749	31	Male	2	0	Constant: you can always or usually hear it in a quiet room	Moderately	Both ears, equally
Participant 750	56	Male	2	0	Constant: you can always or usually hear it in a quiet room	Moderately	Both ears, worse in left
Participant 751	55	Male	0	0	Intermittent: "comes and goes", cannot always hear it in a quiet room	Slightly	Inside the head
Participant 752	37	Male	4	0	Intermittent: "comes and goes", cannot always hear it in a quiet room	Slightly	Both ears, worse in right
Participant 753	44	Male	2	0	Intermittent: "comes and goes", cannot always hear it in a quiet room	Slightly	Both ears, equally
Participant 754	71	Male	1	0	Constant: you can always or usually hear it in a quiet room	Not at all	Both ears, equally
Participant 755	49	Male	1	0	Constant: you can always or usually hear it in a quiet room	Not at all	Inside the head
Participant 756	37	Male	3	0	Constant: you can always or usually hear it in a quiet room	Moderately	Left ear
Participant 757	49	Male	2	0	Intermittent: "comes and goes", cannot always hear it in a quiet room	Slightly	Inside the head
Participant 758	41	Female	2	0	Intermittent: "comes and goes", cannot always hear it in a quiet room	Slightly	Right ear
Participant 759	30	Male	7	0	Constant: you can always or usually hear it in a quiet room	Not at all	Both ears, worse in left
Participant 760	26	Male	1	0	Intermittent: "comes and goes", cannot always hear it in a quiet room	Slightly	Left ear
Participant 761	52	Male	3	0	Intermittent: "comes and goes", cannot always hear it in a quiet room	Not at all	Inside the head
Participant 762	40	Female	2	0	Constant: you can always or usually hear it in a quiet room	Moderately	Both ears, equally
Participant 763	38	Male	2	0	Constant: you can always or usually hear it in a quiet room	Moderately	Both ears, equally
Participant 764	48	Male	2	0	Constant: you can always or usually hear it in a quiet room	Slightly	Inside the head
Participant 765	30	Female	1	1	Intermittent: "comes and goes", cannot always hear it in a quiet room	Not at all	Both ears, worse in left
Participant 766	29	Female	NaN	NaN	Constant: you can always or usually hear it in a quiet room	Not at all	Both ears, equally
Participant 767	29	Male	1	1	Constant: you can always or usually hear it in a quiet room	Moderately	Both ears, equally
Participant 768	44	Male	1	0	Constant: you can always or usually hear it in a quiet room	Not at all	Both ears, equally
Participant 769	37	Male	NaN	NaN	Constant: you can always or usually hear it in a quiet room	Not at all	Both ears, equally
Participant 770	41	Male	2	NaN	Intermittent: "comes and goes", cannot always hear it in a quiet room	Not at all	Right ear
Participant 771	46	Female	0	0	Intermittent: "comes and goes", cannot always hear it in a quiet room	Slightly	Inside the head
Participant 772	42	Male	2	0	Constant: you can always or usually hear it in a quiet room	Severely	Inside the head
Participant 773	58	Male			Constant: you can always or usually hear it in a quiet room	Not at all	Left ear
Participant 774	39	Female	1	0	Intermittent: "comes and goes", cannot always hear it in a quiet room	Not at all	Inside the head
Participant 775	53	Female	2	1	Intermittent: "comes and goes", cannot always hear it in a quiet room	Slightly	Both ears, equally
Participant 776	34	Male	2	1	Intermittent: "comes and goes", cannot always hear it in a quiet room	Slightly	Both ears, worse in right
Participant 777	53	Male	4	0	Constant: you can always or usually hear it in a quiet room	Not at all	Inside the head
Participant 778	66	Female	1	NaN	Intermittent: "comes and goes", cannot always hear it in a quiet room	Not at all	Inside the head
Participant 779	56	Female	1	0	Constant: you can always or usually hear it in a quiet room	Slightly	Inside the head
Participant 780	27	Male	0	0	Constant: you can always or usually hear it in a quiet room	Moderately	Both ears, equally
Participant 781	31	Female	2	0	Constant: you can always or usually hear it in a quiet room	Moderately	Both ears, worse in left
Participant 782	45	Male	2	0	Constant: you can always or usually hear it in a quiet room	Moderately	Both ears, worse in left
Participant 783	43	Female	1	1	Intermittent: "comes and goes", cannot always hear it in a quiet room	Not at all	Both ears, worse in right
Participant 784	34	Female	0	0	Intermittent: "comes and goes", cannot always hear it in a quiet room	Moderately	Both ears, worse in right
Participant 785	57	Female	2	0	Intermittent: "comes and goes", cannot always hear it in a quiet room	Slightly	Left ear
Participant 786	49	Female	3	0	Intermittent: "comes and goes", cannot always hear it in a quiet room	Moderately	Right ear
Participant 787	51	Female	1	0	Constant: you can always or usually hear it in a quiet room	Severely	Both ears, equally
Participant 788	39	Female	3	1	Intermittent: "comes and goes", cannot always hear it in a quiet room	Not at all	Both ears, equally
Participant 789	44	Female	0	0	Constant: you can always or usually hear it in a quiet room	Moderately	Both ears, worse in right
Participant 790	53	Male	3	0	Constant: you can always or usually hear it in a quiet room	Moderately	Both ears, worse in left
Participant 791	47	Male	1	0	Constant: you can always or usually hear it in a quiet room	Slightly	Both ears, equally
Participant 792	33	Female	2	0	Constant: you can always or usually hear it in a quiet room	Slightly	Right ear
Participant 793	29	Male	0	0	Constant: you can always or usually hear it in a quiet room	Slightly	Both ears, worse in right
Participant 794	36	Female	2	0	Intermittent: "comes and goes", cannot always hear it in a quiet room	Not at all	Right ear
Participant 795	49	Male	2	0	Intermittent: "comes and goes", cannot always hear it in a quiet room	Moderately	Left ear
Participant 796	53	Female	1	0	Intermittent: "comes and goes", cannot always hear it in a quiet room	Not at all	Inside the head
Participant 797	52	Female	1	0	Intermittent: "comes and goes", cannot always hear it in a quiet room	Not at all	Both ears, equally
Participant 798	59	Female	3	0	Intermittent: "comes and goes", cannot always hear it in a quiet room	Slightly	Left ear
Participant 799	61	Male	1	0	Intermittent: "comes and goes", cannot always hear it in a quiet room	Slightly	Inside the head
Participant 800	29	Male	5	0	Constant: you can always or usually hear it in a quiet room	Moderately	Inside the head
Participant 801	49	Male	1	0	Constant: you can always or usually hear it in a quiet room	Not at all	Both ears, worse in left
Participant 802	43	Female	2	0	Intermittent: "comes and goes", cannot always hear it in a quiet room	Slightly	Left ear
Participant 803	29	Male	2	1	Intermittent: "comes and goes", cannot always hear it in a quiet room	Moderately	Inside the head
Participant 804	81	Male	1	0	Constant: you can always or usually hear it in a quiet room	Moderately	Inside the head
Participant 805	58	Male	3	0	Constant: you can always or usually hear it in a quiet room	Slightly	Both ears, worse in left
Participant 806	64	Female	0	NaN	Constant: you can always or usually hear it in a quiet room	Moderately	Both ears, worse in right
Participant 807	73	Female	NaN	NaN	Constant: you can always or usually hear it in a quiet room	Moderately	Inside the head
Participant 808	37	Female	3	0	Intermittent: "comes and goes", cannot always hear it in a quiet room	Slightly	Do not know
Participant 809	43	Female	1	0	Intermittent: "comes and goes", cannot always hear it in a quiet room	Slightly	Left ear
Participant 810	48	Female	1	NaN	Intermittent: "comes and goes", cannot always hear it in a quiet room	Slightly	Do not know
Participant 811	39	Male	2	0	Constant: you can always or usually hear it in a quiet room	Slightly	Both ears, worse in left
Participant 812	38	Male	1	NaN	Intermittent: "comes and goes", cannot always hear it in a quiet room	Not at all	Both ears, equally
Participant 813	65	Female	3	0	Intermittent: "comes and goes", cannot always hear it in a quiet room	Not at all	Do not know
Participant 814	34	Female	2	1	Intermittent: "comes and goes", cannot always hear it in a quiet room	Slightly	Inside the head
Participant 815	36	Male	2	0	Constant: you can always or usually hear it in a quiet room	Not at all	Both ears, equally
Participant 816	40	Female	4	1	Intermittent: "comes and goes", cannot always hear it in a quiet room	Slightly	Both ears, worse in left
Participant 817	73	Male	2	0	Constant: you can always or usually hear it in a quiet room	Moderately	Inside the head
Participant 818	54	Male	1	0	Constant: you can always or usually hear it in a quiet room	Severely	Both ears, equally
Participant 819	39	Male	0	0	Constant: you can always or usually hear it in a quiet room	Slightly	Right ear
Participant 820	66	Female	0	0	Intermittent: "comes and goes", cannot always hear it in a quiet room	Slightly	Inside the head
Participant 821	43	Male	1	0	Constant: you can always or usually hear it in a quiet room	Slightly	Both ears, worse in left
Participant 822	47	Female	3	0	Constant: you can always or usually hear it in a quiet room	Slightly	Both ears, equally
Participant 823	34	Male	3	0	Intermittent: "comes and goes", cannot always hear it in a quiet room	Not at all	Left ear
Participant 824	59	Male	2	0	Intermittent: "comes and goes", cannot always hear it in a quiet room	Not at all	Both ears, equally
Participant 825	41	Male	2	0	Constant: you can always or usually hear it in a quiet room	Moderately	Right ear
Participant 826	40	Female	2	0	Constant: you can always or usually hear it in a quiet room	Moderately	Left ear
Participant 827	42	Female	3	0	Intermittent: "comes and goes", cannot always hear it in a quiet room	Slightly	Both ears, worse in right
Participant 828	23	Female	1	0	Constant: you can always or usually hear it in a quiet room	Not at all	Do not know
Participant 829	51	Female	1	0	Constant: you can always or usually hear it in a quiet room	Not at all	Inside the head
Participant 830	34	Male	4	0	Constant: you can always or usually hear it in a quiet room	Not at all	Right ear
Participant 831	38	Male	1	0	Intermittent: "comes and goes", cannot always hear it in a quiet room	Slightly	Both ears, equally
Participant 832	43	Male	0	0	Constant: you can always or usually hear it in a quiet room	Slightly	Both ears, equally
Participant 833	42	Female	1	0	Intermittent: "comes and goes", cannot always hear it in a quiet room	Slightly	Both ears, equally
Participant 834	31	Male	1	0	Constant: you can always or usually hear it in a quiet room	Severely	Both ears, worse in left
Participant 835	46	Female	1	NaN	Intermittent: "comes and goes", cannot always hear it in a quiet room	Slightly	Do not know
Participant 836	40	Male	1	0	Intermittent: "comes and goes", cannot always hear it in a quiet room	Not at all	Inside the head
Participant 837		Male	1	0	Constant: you can always or usually hear it in a quiet room	Slightly	Left ear
Participant 838	44	Female	1	1	Constant: you can always or usually hear it in a quiet room	Moderately	Inside the head
Participant 839	65	Female	1	NaN	Constant: you can always or usually hear it in a quiet room	Not at all	Both ears, equally
Participant 840	53	Male	1	0	Constant: you can always or usually hear it in a quiet room	Not at all	Both ears, equally
Participant 841	40	Male	0	0	Constant: you can always or usually hear it in a quiet room	Slightly	Both ears, worse in left
Participant 842	33	Female	4	0	Intermittent: "comes and goes", cannot always hear it in a quiet room	Not at all	Do not know
Participant 843	38	Male	5	1	Constant: you can always or usually hear it in a quiet room	Not at all	Both ears, equally
Participant 844	46	Male	2	0	Intermittent: "comes and goes", cannot always hear it in a quiet room	Slightly	Inside the head
Participant 845	50	Male	1	NaN	Intermittent: "comes and goes", cannot always hear it in a quiet room	Not at all	Inside the head
Participant 846	36	Male	3	0	Intermittent: "comes and goes", cannot always hear it in a quiet room	Slightly	Both ears, worse in right
Participant 847	44	Male	3	0	Constant: you can always or usually hear it in a quiet room	Not at all	Both ears, equally
Participant 848	42	Female	1	0	Constant: you can always or usually hear it in a quiet room	Moderately	Both ears, equally
Participant 849	51	Male	1	0	Intermittent: "comes and goes", cannot always hear it in a quiet room	Slightly	Left ear
Participant 850	30	Male	4	0	Constant: you can always or usually hear it in a quiet room	Slightly	Both ears, equally
Participant 851	74	Female	2	NaN	Constant: you can always or usually hear it in a quiet room	Not at all	Both ears, equally
Participant 852	76	Male	0	0	Constant: you can always or usually hear it in a quiet room	Not at all	Both ears, worse in left
Participant 853	71	Female	1	0	Constant: you can always or usually hear it in a quiet room	Severely	Both ears, equally
Participant 854	43	Male	2	NaN	Intermittent: "comes and goes", cannot always hear it in a quiet room	Not at all	Left ear
Participant 855	44	Female	2	0	Constant: you can always or usually hear it in a quiet room	Slightly	Inside the head
Participant 856	27	Female	1	0	Intermittent: "comes and goes", cannot always hear it in a quiet room	Not at all	Inside the head
Participant 857	63	Male	0	NaN	Constant: you can always or usually hear it in a quiet room	Slightly	Other (please specify below)
Participant 858	31	Female	2	0	Intermittent: "comes and goes", cannot always hear it in a quiet room	Slightly	Both ears, worse in left
Participant 859	73	Male	4	0	Constant: you can always or usually hear it in a quiet room	Moderately	Both ears, equally
Participant 860	22	Male	4	1	Constant: you can always or usually hear it in a quiet room	Severely	Both ears, worse in left
Participant 861	35	Male	1	0	Constant: you can always or usually hear it in a quiet room	Slightly	Both ears, equally
Participant 862	41	Female	1	NaN	Constant: you can always or usually hear it in a quiet room	Slightly	Both ears, equally
Participant 863	24	Female	1	0	Intermittent: "comes and goes", cannot always hear it in a quiet room	Slightly	Both ears, worse in right
Participant 864	43	Female			Intermittent: "comes and goes", cannot always hear it in a quiet room	Slightly	Both ears, equally
Participant 865	56	Female	5	NaN	Constant: you can always or usually hear it in a quiet room	Moderately	Right ear
Participant 866	67	Male	1	0	Constant: you can always or usually hear it in a quiet room	Slightly	Inside the head
Participant 867	73	Female	3	NaN	Intermittent: "comes and goes", cannot always hear it in a quiet room	Slightly	Both ears, worse in left
Participant 868	48	Female	1	0	Constant: you can always or usually hear it in a quiet room	Moderately	Both ears, worse in left
Participant 869	36	Female	2	0	Intermittent: "comes and goes", cannot always hear it in a quiet room	Slightly	Both ears, worse in left
Participant 870	53	Female	2	0	Constant: you can always or usually hear it in a quiet room	Moderately	Both ears, equally
Participant 871	31	Male	1	0	Intermittent: "comes and goes", cannot always hear it in a quiet room	Not at all	Right ear
Participant 872	64	Male	1	NaN	Constant: you can always or usually hear it in a quiet room	Slightly	Other (please specify below)
Participant 873	37	Male	1	0	Intermittent: "comes and goes", cannot always hear it in a quiet room	Not at all	Left ear
Participant 874	54	Female	2	0	Constant: you can always or usually hear it in a quiet room	Slightly	Both ears, equally
Participant 875	30	Female	2	0	Constant: you can always or usually hear it in a quiet room	Moderately	Both ears, worse in left
Participant 876	60	Male	3	0	Constant: you can always or usually hear it in a quiet room	Not at all	Both ears, equally
Participant 877	33	Female	3	0	Intermittent: "comes and goes", cannot always hear it in a quiet room	Not at all	Do not know
Participant 878	47	Male	1	0	Intermittent: "comes and goes", cannot always hear it in a quiet room	Not at all	Both ears, worse in left
Participant 879	29	Female	2	0	Constant: you can always or usually hear it in a quiet room	Moderately	Both ears, equally
Participant 880	43	Male	1	0	Constant: you can always or usually hear it in a quiet room	Slightly	Inside the head
Participant 881	32	Female	1	0	Constant: you can always or usually hear it in a quiet room	Moderately	Inside the head
Participant 882	28	Male	0	0	Intermittent: "comes and goes", cannot always hear it in a quiet room	Slightly	Both ears, worse in right
Participant 883	36	Female	NaN	NaN	Intermittent: "comes and goes", cannot always hear it in a quiet room	Slightly	Both ears, equally
Participant 884	50	Female	2	NaN	Constant: you can always or usually hear it in a quiet room	Not at all	Both ears, worse in right
Participant 885	45	Male	2	1	Constant: you can always or usually hear it in a quiet room	Not at all	Both ears, worse in left
Participant 886	68	Male	3	0	Constant: you can always or usually hear it in a quiet room	Moderately	Left ear
Participant 887	31	Male	1	0	Constant: you can always or usually hear it in a quiet room	Slightly	Inside the head
Participant 888	39	Male	0	0	Constant: you can always or usually hear it in a quiet room	Moderately	Both ears, worse in left
Participant 889	36	Male	1	NaN	Intermittent: "comes and goes", cannot always hear it in a quiet room	Not at all	Both ears, worse in left
Participant 890	74	Female	4	0	Intermittent: "comes and goes", cannot always hear it in a quiet room	Moderately	Inside the head
Participant 891	51	Male	1	0	Constant: you can always or usually hear it in a quiet room	Moderately	Left ear
Participant 892	34	Male	4	NaN	Constant: you can always or usually hear it in a quiet room	Slightly	Both ears, worse in right
Participant 893	33	Female	1	0	Intermittent: "comes and goes", cannot always hear it in a quiet room	Moderately	Both ears, equally
Participant 894	31	Male	1	0	Constant: you can always or usually hear it in a quiet room	Slightly	Both ears, equally
Participant 895	49	Female	1	0	Constant: you can always or usually hear it in a quiet room	Moderately	Both ears, equally
Participant 896	59	Female	2	0	Intermittent: "comes and goes", cannot always hear it in a quiet room	Slightly	Both ears, worse in left
Participant 897	43	Female	2	NaN	Constant: you can always or usually hear it in a quiet room	Not at all	Both ears, equally
Participant 898	53	Male	1	1	Constant: you can always or usually hear it in a quiet room	Slightly	Both ears, equally
Participant 899	27	Male	2	0	Constant: you can always or usually hear it in a quiet room	Slightly	Both ears, worse in left
Participant 900	53	Male	1	0	Constant: you can always or usually hear it in a quiet room	Moderately	Inside the head
Participant 901	42	Male	1	0	Constant: you can always or usually hear it in a quiet room	Not at all	Both ears, equally
Participant 902	57	Male	3	0	Intermittent: "comes and goes", cannot always hear it in a quiet room	Moderately	Both ears, worse in left
Participant 903	48	Female	2	1	Constant: you can always or usually hear it in a quiet room	Not at all	Both ears, equally
Participant 904	78	Female	1	0	Constant: you can always or usually hear it in a quiet room	Moderately	Inside the head
Participant 905	48	Female	1	0	Constant: you can always or usually hear it in a quiet room	Moderately	Left ear
Participant 906	69	Male	0	0	Constant: you can always or usually hear it in a quiet room	Not at all	Inside the head
Participant 907	71	Female	1	1	Constant: you can always or usually hear it in a quiet room	Moderately	Inside the head
Participant 908	43	Male	0	0	Constant: you can always or usually hear it in a quiet room	Slightly	Right ear
Participant 909	37	Male	3	0	Intermittent: "comes and goes", cannot always hear it in a quiet room	Not at all	Inside the head
Participant 910	36	Female	2	0	Constant: you can always or usually hear it in a quiet room	Moderately	Inside the head
Participant 911	58	Female	0	0	Constant: you can always or usually hear it in a quiet room	Moderately	Both ears, equally
Participant 912	69	Male	2	0	Constant: you can always or usually hear it in a quiet room	Moderately	Both ears, equally
Participant 913	33	Male	2	0	Constant: you can always or usually hear it in a quiet room	Moderately	Both ears, equally
Participant 914	67	Male	2	0	Constant: you can always or usually hear it in a quiet room	Slightly	Both ears, equally
Participant 915	54	Female	3	0	Constant: you can always or usually hear it in a quiet room	Moderately	Left ear
Participant 916	52	Male	3	NaN	Constant: you can always or usually hear it in a quiet room	Moderately	Both ears, equally
Participant 917	46	Female	2	0	Intermittent: "comes and goes", cannot always hear it in a quiet room	Slightly	Both ears, equally
Participant 918	47	Male	1	NaN	Constant: you can always or usually hear it in a quiet room	Slightly	Both ears, equally
Participant 919	38	Male	1	0	Constant: you can always or usually hear it in a quiet room	Slightly	Both ears, worse in left
Participant 920	54	Male	2	NaN	Intermittent: "comes and goes", cannot always hear it in a quiet room	Not at all	Both ears, equally
Participant 921	42	Male	0	0	Constant: you can always or usually hear it in a quiet room	Slightly	Both ears, equally
Participant 922	39	Female	2	0	Constant: you can always or usually hear it in a quiet room	Moderately	Right ear
Participant 923	54	Female	1	0	Constant: you can always or usually hear it in a quiet room	Moderately	Both ears, worse in left
Participant 924	39	Male	1	0	Constant: you can always or usually hear it in a quiet room	Moderately	Both ears, equally
Participant 925	32	Male	3	1	Constant: you can always or usually hear it in a quiet room	Not at all	Both ears, worse in left
Participant 926	43	Male	1	0	Constant: you can always or usually hear it in a quiet room	Moderately	Inside the head
Participant 927	55	Female	1	0	Constant: you can always or usually hear it in a quiet room	Severely	Both ears, worse in left
Participant 928	44	Male	1	0	Intermittent: "comes and goes", cannot always hear it in a quiet room	Slightly	Both ears, worse in right
Participant 929	53	Male	1	0	Constant: you can always or usually hear it in a quiet room	Slightly	Both ears, equally
Participant 930	54	Female	0	0	Constant: you can always or usually hear it in a quiet room	Severely	Both ears, worse in left
Participant 931	69	Male	0	0	Intermittent: "comes and goes", cannot always hear it in a quiet room	Moderately	Both ears, worse in left
Participant 932	44	Male	2	0	Intermittent: "comes and goes", cannot always hear it in a quiet room	Not at all	Right ear
Participant 933	37	Female	3	0	Intermittent: "comes and goes", cannot always hear it in a quiet room	Not at all	Inside the head
Participant 934	25	Male	4	0	Constant: you can always or usually hear it in a quiet room	Moderately	Both ears, worse in right
Participant 935	71	Female	1	0	Constant: you can always or usually hear it in a quiet room	Slightly	Both ears, worse in right
Participant 936	61	Female	3	NaN	Constant: you can always or usually hear it in a quiet room	Slightly	Both ears, worse in left
Participant 937	30	Male	3	NaN	Constant: you can always or usually hear it in a quiet room	Slightly	Inside the head
Participant 938	42	Female	4	NaN	Constant: you can always or usually hear it in a quiet room	Moderately	Both ears, worse in left
Participant 939	70	Male	1	NaN	Constant: you can always or usually hear it in a quiet room	Slightly	Both ears, equally
Participant 940	73	Male	NaN	NaN	Intermittent: "comes and goes", cannot always hear it in a quiet room	Slightly	Inside the head
Participant 941	62	Female			Intermittent: "comes and goes", cannot always hear it in a quiet room	Not at all	Both ears, equally
Participant 942	68	Male	3	0	Intermittent: "comes and goes", cannot always hear it in a quiet room	Not at all	Both ears, worse in left
Participant 943	61	Female			Constant: you can always or usually hear it in a quiet room	Moderately	Both ears, worse in right
Participant 944	74	Male	5	NaN	Constant: you can always or usually hear it in a quiet room	Moderately	Both ears, worse in left
Participant 945	29	Female	1	0	Constant: you can always or usually hear it in a quiet room	Moderately	Both ears, worse in right
Participant 946	36	Female	3	0	Constant: you can always or usually hear it in a quiet room	Slightly	Both ears, worse in right
Participant 947	53	Female	1	0	Constant: you can always or usually hear it in a quiet room	Moderately	Inside the head
Participant 948	50	Male	2	0	Constant: you can always or usually hear it in a quiet room	Slightly	Left ear
Participant 949	55	Female	1	0	Constant: you can always or usually hear it in a quiet room	Not at all	Both ears, worse in left
Participant 950	55	Male	0	0	Constant: you can always or usually hear it in a quiet room	Moderately	Inside the head
Participant 951	57	Female	0	1	Constant: you can always or usually hear it in a quiet room	Slightly	Inside the head
Participant 952	61	Male	1	0	Constant: you can always or usually hear it in a quiet room	Slightly	Left ear
Participant 953	55	Female	2	1	Constant: you can always or usually hear it in a quiet room	Severely	Inside the head
Participant 954	56	Female	4	NaN	Constant: you can always or usually hear it in a quiet room	Severely	Inside the head
Participant 955	58	Female	5	0	Constant: you can always or usually hear it in a quiet room	Severely	Left ear
Participant 956	70	Female	0	0	Constant: you can always or usually hear it in a quiet room	Slightly	Both ears, equally
Participant 957	38	Female	1	0	Constant: you can always or usually hear it in a quiet room	Moderately	Both ears, worse in left
Participant 958	60	Female	2	NaN	Intermittent: "comes and goes", cannot always hear it in a quiet room	Not at all	Both ears, equally
Participant 959	57	Male	1	0	Constant: you can always or usually hear it in a quiet room	Slightly	Both ears, equally
Participant 960	56	Female	2	0	Constant: you can always or usually hear it in a quiet room	Severely	Both ears, worse in right
Participant 961	61	Male	0	0	Constant: you can always or usually hear it in a quiet room	Moderately	Inside the head
Participant 962	63	Male	3	0	Constant: you can always or usually hear it in a quiet room	Moderately	Both ears, equally
Participant 963	69	Female	4	NaN	Constant: you can always or usually hear it in a quiet room	Slightly	Both ears, worse in right
Participant 964	73	Male	1	1	Constant: you can always or usually hear it in a quiet room	Moderately	Inside the head
Participant 965	52	Female	1	1	Constant: you can always or usually hear it in a quiet room	Severely	Both ears, equally
Participant 966	57	Male	0	0	Constant: you can always or usually hear it in a quiet room	Slightly	Both ears, equally
Participant 967	70	Male	2	0	Constant: you can always or usually hear it in a quiet room	Moderately	Both ears, equally
Participant 968	57	Male	1	0	Constant: you can always or usually hear it in a quiet room	Not at all	Both ears, worse in right
Participant 969	62	Female	3	0	Constant: you can always or usually hear it in a quiet room	Moderately	Inside the head
Participant 970	56	Male	2	0	Constant: you can always or usually hear it in a quiet room	Severely	Both ears, equally
Participant 971	58	Female	0	0	Intermittent: "comes and goes", cannot always hear it in a quiet room	Moderately	Both ears, equally
Participant 972	78	Male	1	0	Constant: you can always or usually hear it in a quiet room	Not at all	Both ears, equally
Participant 973	70	Male	5	1	Constant: you can always or usually hear it in a quiet room	Moderately	Both ears, worse in left
Participant 974	67	Female	2	NaN	Constant: you can always or usually hear it in a quiet room	Slightly	Both ears, worse in left
Participant 975	61	Female	2	0	Constant: you can always or usually hear it in a quiet room	Moderately	Left ear
Participant 976	68	Male	3	2	Constant: you can always or usually hear it in a quiet room	Severely	Both ears, worse in right
Participant 977	67	Male	1	1	Constant: you can always or usually hear it in a quiet room	Not at all	Both ears, worse in right
Participant 978	59	Male	7	1	Constant: you can always or usually hear it in a quiet room	Moderately	Inside the head
Participant 979	58	Male	1	0	Constant: you can always or usually hear it in a quiet room	Moderately	Other (please specify below)
Participant 980	60	Male	4	0	Constant: you can always or usually hear it in a quiet room	Slightly	Inside the head
Participant 981	68	Male	3	0	Intermittent: "comes and goes", cannot always hear it in a quiet room	Slightly	Both ears, equally
Participant 982	63	Female	1	1	Constant: you can always or usually hear it in a quiet room	Moderately	Both ears, worse in right
Participant 983	54	Female	1	0	Constant: you can always or usually hear it in a quiet room	Moderately	Both ears, equally
Participant 984	57	Female	1	0	Constant: you can always or usually hear it in a quiet room	Moderately	Both ears, worse in left
Participant 985	54	Female	2	0	Constant: you can always or usually hear it in a quiet room	Slightly	Both ears, worse in left
Participant 986	57	Male	0	0	Constant: you can always or usually hear it in a quiet room	Slightly	Both ears, equally
Participant 987	75	Male	4	NaN	Intermittent: "comes and goes", cannot always hear it in a quiet room	Severely	Both ears, equally
Participant 988	44	Female	2	0	Constant: you can always or usually hear it in a quiet room	Moderately	Both ears, worse in right
Participant 989	71	Female	1	1	Constant: you can always or usually hear it in a quiet room	Slightly	Both ears, equally
Participant 990	55	Male	1	1	Constant: you can always or usually hear it in a quiet room	Slightly	Both ears, worse in left
Participant 991	71	Female	1	0	Constant: you can always or usually hear it in a quiet room	Slightly	Both ears, equally
Participant 992	55	Female	1	NaN	Constant: you can always or usually hear it in a quiet room	Moderately	Both ears, worse in right
Participant 993	74	Female	0	0	Constant: you can always or usually hear it in a quiet room	Not at all	Inside the head
Participant 994	64	Female	1	0	Constant: you can always or usually hear it in a quiet room	Severely	Inside the head
Participant 995	67	Female	2	0	Constant: you can always or usually hear it in a quiet room	Moderately	Both ears, worse in left
Participant 996	59	Female	1	0	Intermittent: "comes and goes", cannot always hear it in a quiet room	Slightly	Both ears, equally
Participant 997	61	Male	4	0	Constant: you can always or usually hear it in a quiet room	Slightly	Both ears, equally
Participant 998	57	Female	1	0	Constant: you can always or usually hear it in a quiet room	Slightly	Both ears, worse in right
Participant 999	62	Male	1	0	Constant: you can always or usually hear it in a quiet room	Moderately	Both ears, equally
Participant 1000	62	Female	0	0	Constant: you can always or usually hear it in a quiet room	Moderately	Both ears, equally
Participant 1001	64	Female	1	0	Constant: you can always or usually hear it in a quiet room	Severely	Both ears, worse in right
Participant 1002	68	Male	0	0	Constant: you can always or usually hear it in a quiet room	Slightly	Both ears, equally
Participant 1003	69	Male	1	0	Constant: you can always or usually hear it in a quiet room	Severely	Both ears, worse in right
Participant 1004	62	Male	1	1	Constant: you can always or usually hear it in a quiet room	Slightly	Inside the head
Participant 1005	59	Female	1	0	Constant: you can always or usually hear it in a quiet room	Not at all	Both ears, worse in left
Participant 1006	54	Male	2	0	Constant: you can always or usually hear it in a quiet room	Moderately	Both ears, worse in left
Participant 1007	72	Male	1	0	Constant: you can always or usually hear it in a quiet room	Slightly	Right ear
Participant 1008	62	Female	1	NaN	Constant: you can always or usually hear it in a quiet room	Moderately	Both ears, worse in left
Participant 1009	70	Female	1	0	Constant: you can always or usually hear it in a quiet room	Slightly	Both ears, equally
Participant 1010	71	Male	1	0	Constant: you can always or usually hear it in a quiet room	Moderately	Both ears, worse in right
Participant 1011	32	Female	1	0	Constant: you can always or usually hear it in a quiet room	Not at all	Both ears, equally
Participant 1012	62	Female	1	0	Intermittent: "comes and goes", cannot always hear it in a quiet room	Slightly	Inside the head
Participant 1013	54	Male	1	0	Constant: you can always or usually hear it in a quiet room	Not at all	Both ears, worse in right
Participant 1014	75	Male	1	NaN	Constant: you can always or usually hear it in a quiet room	Slightly	Both ears, worse in left
Participant 1015	60	Male	0	0	Constant: you can always or usually hear it in a quiet room	Moderately	Both ears, equally
Participant 1016	62	Female	2	1	Constant: you can always or usually hear it in a quiet room	Moderately	Both ears, worse in right
Participant 1017	72	Male	2	0	Intermittent: "comes and goes", cannot always hear it in a quiet room	Slightly	Both ears, equally
Participant 1018	55	Female	2	0	Constant: you can always or usually hear it in a quiet room	Moderately	Both ears, worse in left
Participant 1019	33	Female	3	0	Constant: you can always or usually hear it in a quiet room	Moderately	Left ear
Participant 1020	60	Male	1	0	Constant: you can always or usually hear it in a quiet room	Slightly	Inside the head
Participant 1021	68	Male	1	0	Intermittent: "comes and goes", cannot always hear it in a quiet room	Not at all	Both ears, worse in right
Participant 1022	63	Male	1	0	Constant: you can always or usually hear it in a quiet room	Moderately	Both ears, equally
Participant 1023	57	Female	2	0	Constant: you can always or usually hear it in a quiet room	Moderately	Both ears, worse in left
Participant 1024	42	Female	1	0	Constant: you can always or usually hear it in a quiet room	Severely	Both ears, worse in left
Participant 1025	63	Male	1	0	Intermittent: "comes and goes", cannot always hear it in a quiet room	Slightly	Inside the head
Participant 1026	62	Female	3	0	Constant: you can always or usually hear it in a quiet room	Not at all	Inside the head
Participant 1027	55	Male	1	1	Constant: you can always or usually hear it in a quiet room	Not at all	Inside the head
Participant 1028	59	Female	1	0	Intermittent: "comes and goes", cannot always hear it in a quiet room	Moderately	Both ears, worse in right
Participant 1029	32	Male	2	0	Constant: you can always or usually hear it in a quiet room	Moderately	Both ears, equally
Participant 1030	61	Female	2	NaN	Intermittent: "comes and goes", cannot always hear it in a quiet room	Moderately	Right ear
Participant 1031	66	Female	1	0	Constant: you can always or usually hear it in a quiet room	Severely	Both ears, worse in left
Participant 1032	69	Female	3	2	Constant: you can always or usually hear it in a quiet room	Not at all	Inside the head
Participant 1033	54	Male	1	NaN	Constant: you can always or usually hear it in a quiet room	Severely	Both ears, equally
Participant 1034	59	Male	3	3	Constant: you can always or usually hear it in a quiet room	Severely	Both ears, worse in left
Participant 1035	60	Female	4	0	Constant: you can always or usually hear it in a quiet room	Slightly	Both ears, equally
Participant 1036	35	Female	4	0	Constant: you can always or usually hear it in a quiet room	Moderately	Left ear
Participant 1037	71	Male	3	1	Constant: you can always or usually hear it in a quiet room	Slightly	Both ears, equally
Participant 1038	62	Male	2	0	Constant: you can always or usually hear it in a quiet room	Slightly	Both ears, equally
Participant 1039	68	Female	4	1	Constant: you can always or usually hear it in a quiet room	Severely	Inside the head
Participant 1040	70	Male	0	0	Constant: you can always or usually hear it in a quiet room	Severely	Inside the head
Participant 1041	57	Female	1	0	Constant: you can always or usually hear it in a quiet room	Moderately	Right ear
Participant 1042	70	Male	0	0	Constant: you can always or usually hear it in a quiet room	Moderately	Both ears, equally
Participant 1043	76	Female	0	0	Constant: you can always or usually hear it in a quiet room	Severely	Both ears, worse in left
Participant 1044	71	Male	0	0	Constant: you can always or usually hear it in a quiet room	Moderately	Both ears, equally
Participant 1045	35	Male	5	1	Constant: you can always or usually hear it in a quiet room	Slightly	Both ears, equally
Participant 1046	76	Male			Constant: you can always or usually hear it in a quiet room	Moderately	Inside the head
Participant 1047	47	Female	2	0	Intermittent: "comes and goes", cannot always hear it in a quiet room	Severely	Both ears, equally
Participant 1048	63	Male	1	0	Intermittent: "comes and goes", cannot always hear it in a quiet room	Slightly	Inside the head
Participant 1049	54	Female	4	2	Constant: you can always or usually hear it in a quiet room	Severely	Left ear
Participant 1050	46	Male	1	0	Constant: you can always or usually hear it in a quiet room	Moderately	Both ears, worse in left
Participant 1051	31	Female	2	2	Intermittent: "comes and goes", cannot always hear it in a quiet room	Slightly	Both ears, equally
Participant 1052	41	Female	1	0	Intermittent: "comes and goes", cannot always hear it in a quiet room	Slightly	Both ears, equally
Participant 1053	47	Female	1	0	Intermittent: "comes and goes", cannot always hear it in a quiet room	Slightly	Inside the head
Participant 1054	58	Male	1	0	Intermittent: "comes and goes", cannot always hear it in a quiet room	Slightly	Both ears, worse in left
Participant 1055	57	Female	2	NaN	Constant: you can always or usually hear it in a quiet room	Not at all	Both ears, equally
Participant 1056	44	Female	1	0	Constant: you can always or usually hear it in a quiet room	Moderately	Inside the head
Participant 1057	67	Female	0	0	Constant: you can always or usually hear it in a quiet room	Moderately	Both ears, worse in left
Participant 1058	41	Female	1	0	Constant: you can always or usually hear it in a quiet room	Moderately	Both ears, equally
Participant 1059	50	Female	1	0	Intermittent: "comes and goes", cannot always hear it in a quiet room	Not at all	Do not know
Participant 1060	36	Female	1	0	Intermittent: "comes and goes", cannot always hear it in a quiet room	Moderately	Both ears, worse in right
Participant 1061	49	Female	2	NaN	Constant: you can always or usually hear it in a quiet room	Moderately	Both ears, equally
Participant 1062	91	Female	1	NaN	Constant: you can always or usually hear it in a quiet room	Severely	Inside the head
Participant 1063	61	Female	10	2	Constant: you can always or usually hear it in a quiet room	Severely	Both ears, worse in right
Participant 1064	70	Male	1	0	Constant: you can always or usually hear it in a quiet room	Moderately	Both ears, worse in left
Participant 1065	49	Female	1	0	Constant: you can always or usually hear it in a quiet room	Not at all	Both ears, equally
Participant 1066	37	Female	2	NaN	Intermittent: "comes and goes", cannot always hear it in a quiet room	Not at all	Both ears, equally
Participant 1067	32	Female	1	0	Intermittent: "comes and goes", cannot always hear it in a quiet room	Slightly	Both ears, worse in left
Participant 1068	48	Female	0	0	Constant: you can always or usually hear it in a quiet room	Moderately	Both ears, worse in left
Participant 1069	50	Female	1	0	Constant: you can always or usually hear it in a quiet room	Not at all	Both ears, equally
Participant 1070	69	Male	1	0	Constant: you can always or usually hear it in a quiet room	Severely	Inside the head
Participant 1071	45	Female	0	0	Intermittent: "comes and goes", cannot always hear it in a quiet room	Slightly	Right ear
Participant 1072	62	Female	2	0	Constant: you can always or usually hear it in a quiet room	Moderately	Both ears, worse in left
Participant 1073	63	Female	1	0	Intermittent: "comes and goes", cannot always hear it in a quiet room	Slightly	Both ears, equally
Participant 1074	65	Female	1	NaN	Constant: you can always or usually hear it in a quiet room	Not at all	Both ears, worse in left
Participant 1075	60	Female	2	1	Constant: you can always or usually hear it in a quiet room	Severely	Both ears, worse in left
Participant 1076	53	Female	2	1	Constant: you can always or usually hear it in a quiet room	Severely	Both ears, equally
Participant 1077	75	Female	1	NaN	Constant: you can always or usually hear it in a quiet room	Slightly	Inside the head
Participant 1078	55	Female	4	0	Constant: you can always or usually hear it in a quiet room	Severely	Both ears, equally
Participant 1079	65	Male	3	0	Constant: you can always or usually hear it in a quiet room	Not at all	Left ear
Participant 1080	68	Female	NaN	NaN	Intermittent: "comes and goes", cannot always hear it in a quiet room	Not at all	Right ear
Participant 1081	49	Female	1	0	Intermittent: "comes and goes", cannot always hear it in a quiet room	Not at all	Right ear
Participant 1082	43	Female	2	0	Constant: you can always or usually hear it in a quiet room	Moderately	Both ears, worse in left
Participant 1083	68	Female	1	0	Constant: you can always or usually hear it in a quiet room	Moderately	Left ear
Participant 1084	53	Male	2	0	Constant: you can always or usually hear it in a quiet room	Slightly	Right ear
Participant 1085	71	Male	3	0	Constant: you can always or usually hear it in a quiet room	Severely	Both ears, worse in right
Participant 1086	41	Male	2	NaN	Constant: you can always or usually hear it in a quiet room	Moderately	Both ears, worse in right
Participant 1087	38	Male	3	0	Constant: you can always or usually hear it in a quiet room	Slightly	Left ear
Participant 1088	55	Female	NaN	NaN	Constant: you can always or usually hear it in a quiet room	Moderately	Both ears, equally
Participant 1089	71	Female	1	0	Constant: you can always or usually hear it in a quiet room	Moderately	Left ear
Participant 1090	66	Female	1	NaN	Constant: you can always or usually hear it in a quiet room	Moderately	Other (please specify below)
Participant 1091	58	Female			Constant: you can always or usually hear it in a quiet room	Moderately	Both ears, equally
Participant 1092	76	Female	2	0	Constant: you can always or usually hear it in a quiet room	Moderately	Both ears, worse in right
Participant 1093	64	Male	0	0	Intermittent: "comes and goes", cannot always hear it in a quiet room	Moderately	Both ears, equally
Participant 1094	61	Male	1	1	Constant: you can always or usually hear it in a quiet room	Slightly	Both ears, worse in right
Participant 1095	66	Male	2	0	Constant: you can always or usually hear it in a quiet room	Severely	Right ear
Participant 1096	67	Male	0	0	Constant: you can always or usually hear it in a quiet room	Slightly	Both ears, worse in left
Participant 1097	68	Male	1	0	Constant: you can always or usually hear it in a quiet room	Moderately	Both ears, equally
Participant 1098	41	Female	2	0	Constant: you can always or usually hear it in a quiet room	Severely	Both ears, equally
Participant 1099	47	Male	2	1	Constant: you can always or usually hear it in a quiet room	Moderately	Both ears, worse in right
Participant 1100	44	Female	1	0	Constant: you can always or usually hear it in a quiet room	Not at all	Right ear
Participant 1101	66	Female	1	NaN	Constant: you can always or usually hear it in a quiet room	Not at all	Inside the head
Participant 1102	56	Male	2	0	Constant: you can always or usually hear it in a quiet room	Severely	Left ear
Participant 1103	26	Female	2	0	Intermittent: "comes and goes", cannot always hear it in a quiet room	Slightly	Inside the head
Participant 1104	24	Male	1	0	Constant: you can always or usually hear it in a quiet room	Moderately	Both ears, worse in left
Participant 1105	78	Male	1	0	Constant: you can always or usually hear it in a quiet room	Moderately	Inside the head
Participant 1106	54	Male	1	0	Intermittent: "comes and goes", cannot always hear it in a quiet room	Moderately	Both ears, worse in right
Participant 1107	63	Female	1	NaN	Constant: you can always or usually hear it in a quiet room	Slightly	Left ear
Participant 1108	71	Male	2	0	Constant: you can always or usually hear it in a quiet room	Severely	Inside the head
Participant 1109	78	Male	1	0	Constant: you can always or usually hear it in a quiet room	Slightly	Left ear
Participant 1110	53	Female	1	0	Constant: you can always or usually hear it in a quiet room	Moderately	Both ears, equally
Participant 1111	70	Female	0	0	Constant: you can always or usually hear it in a quiet room	Moderately	Both ears, worse in right
Participant 1112	61	Female	1	0	Constant: you can always or usually hear it in a quiet room	Severely	Inside the head
Participant 1113	38	Male	2	0	Constant: you can always or usually hear it in a quiet room	Moderately	Both ears, worse in right
Participant 1114	63	Female	2	0	Intermittent: "comes and goes", cannot always hear it in a quiet room	Slightly	Left ear
Participant 1115	38	Female	1	0	Intermittent: "comes and goes", cannot always hear it in a quiet room	Do not know	Both ears, equally
Participant 1116	32	Female	2	0	Constant: you can always or usually hear it in a quiet room	Slightly	Both ears, equally
Participant 1117	70	Male	0	0	Constant: you can always or usually hear it in a quiet room	Severely	Both ears, equally
Participant 1118	51	Female			Constant: you can always or usually hear it in a quiet room	Moderately	Right ear
Participant 1119	74	Female	2	NaN	Constant: you can always or usually hear it in a quiet room	Slightly	Both ears, equally
Participant 1120	31	Male	2	0	Constant: you can always or usually hear it in a quiet room	Slightly	Left ear
Participant 1121	61	Male	0	0	Constant: you can always or usually hear it in a quiet room	Moderately	Left ear
Participant 1122	63	Male	1	0	Constant: you can always or usually hear it in a quiet room	Severely	Both ears, equally
Participant 1123	57	Male	1	1	Constant: you can always or usually hear it in a quiet room	Severely	Both ears, equally
Participant 1124	56	Female	NaN	NaN	Constant: you can always or usually hear it in a quiet room	Moderately	Both ears, equally
Participant 1125	58	Female	1	0	Constant: you can always or usually hear it in a quiet room	Slightly	Left ear
Participant 1126	75	Female	4	0	Intermittent: "comes and goes", cannot always hear it in a quiet room	Moderately	Right ear
Participant 1127	79	Male	0	0	Constant: you can always or usually hear it in a quiet room	Moderately	Both ears, worse in left
Participant 1128	64	Female	1	NaN	Constant: you can always or usually hear it in a quiet room	Not at all	Both ears, equally
Participant 1129	81	Male	NaN	NaN	Constant: you can always or usually hear it in a quiet room	Severely	Both ears, worse in left
Participant 1130	72	Male	2	NaN	Constant: you can always or usually hear it in a quiet room	Moderately	Inside the head
Participant 1131	59	Male	2	NaN	Constant: you can always or usually hear it in a quiet room	Moderately	Inside the head
Participant 1132	47	Male	1	1	Constant: you can always or usually hear it in a quiet room	Moderately	Right ear
Participant 1133	64	Female	2	0	Constant: you can always or usually hear it in a quiet room	Slightly	Inside the head
Participant 1134	76	Female	1	0	Constant: you can always or usually hear it in a quiet room	Moderately	Both ears, equally
Participant 1135	30	Female	1	0	Constant: you can always or usually hear it in a quiet room	Moderately	Inside the head
Participant 1136	38	Female	3	0	Constant: you can always or usually hear it in a quiet room	Moderately	Inside the head
Participant 1137	59	Male	3	0	Constant: you can always or usually hear it in a quiet room	Severely	Inside the head
Participant 1138	47	Male	0	0	Intermittent: "comes and goes", cannot always hear it in a quiet room	Slightly	Both ears, worse in left
Participant 1139	42	Male	1	1	Constant: you can always or usually hear it in a quiet room	Slightly	Both ears, equally
Participant 1140	35	Female	1	NaN	Constant: you can always or usually hear it in a quiet room	Slightly	Both ears, worse in right
Participant 1141	41	Male	2	0	Intermittent: "comes and goes", cannot always hear it in a quiet room	Moderately	Both ears, equally
Participant 1142	65	Male	7	0	Constant: you can always or usually hear it in a quiet room	Severely	Both ears, equally
Participant 1143	31	Male	1	0	Constant: you can always or usually hear it in a quiet room	Severely	Both ears, worse in left
Participant 1144	31	Male	2	0	Intermittent: "comes and goes", cannot always hear it in a quiet room	Slightly	Both ears, worse in right
Participant 1145	49	Female	1	0	Intermittent: "comes and goes", cannot always hear it in a quiet room	Slightly	Inside the head
Participant 1146	36	Female	2	0	Constant: you can always or usually hear it in a quiet room	Moderately	Both ears, equally
Participant 1147	54	Female	1	1	Intermittent: "comes and goes", cannot always hear it in a quiet room	Slightly	Both ears, equally
Participant 1148	29	Female	1	1	Intermittent: "comes and goes", cannot always hear it in a quiet room	Severely	Both ears, worse in right
Participant 1149	52	Male	3	NaN	Intermittent: "comes and goes", cannot always hear it in a quiet room	Not at all	Both ears, equally
Participant 1150	64	Male	1	0	Constant: you can always or usually hear it in a quiet room	Severely	Both ears, worse in right
Participant 1151	57	Female	3	NaN	Constant: you can always or usually hear it in a quiet room	Severely	Inside the head
Participant 1152	54	Male	2	0	Constant: you can always or usually hear it in a quiet room	Moderately	Inside the head
Participant 1153	73	Female	0	0	Constant: you can always or usually hear it in a quiet room	Not at all	Left ear
Participant 1154	35	Male	1	0	Intermittent: "comes and goes", cannot always hear it in a quiet room	Slightly	Both ears, worse in left
Participant 1155	36	Male			Constant: you can always or usually hear it in a quiet room	Not at all	Inside the head
Participant 1156	46	Female	0	0	Intermittent: "comes and goes", cannot always hear it in a quiet room	Not at all	Inside the head
Participant 1157	28	Female	4	0	Constant: you can always or usually hear it in a quiet room	Moderately	Both ears, equally
Participant 1158	32	Female	2	1	Constant: you can always or usually hear it in a quiet room	Moderately	Both ears, worse in right
Participant 1159	51	Male	1	0	Constant: you can always or usually hear it in a quiet room	Slightly	Inside the head
Participant 1160	73	Female	1	0	Intermittent: "comes and goes", cannot always hear it in a quiet room	Slightly	Left ear
Participant 1161	58	Male	1	NaN	Intermittent: "comes and goes", cannot always hear it in a quiet room	Not at all	Both ears, equally
Participant 1162	59	Female	2	NaN	Constant: you can always or usually hear it in a quiet room	Slightly	Left ear
Participant 1163	72	Male	NaN	NaN	Constant: you can always or usually hear it in a quiet room	Severely	Both ears, equally
Participant 1164	66	Female	5	0	Intermittent: "comes and goes", cannot always hear it in a quiet room	Slightly	Both ears, worse in right
Participant 1165	64	Male	3	0	Intermittent: "comes and goes", cannot always hear it in a quiet room	Not at all	Inside the head
Participant 1166	75	Female	3	0	Intermittent: "comes and goes", cannot always hear it in a quiet room	Not at all	Inside the head
Participant 1167	56	Male			Constant: you can always or usually hear it in a quiet room	Slightly	Left ear
Participant 1168	63	Female	2	1	Constant: you can always or usually hear it in a quiet room	Not at all	Left ear
Participant 1169	41	Male	3	0	Intermittent: "comes and goes", cannot always hear it in a quiet room	Not at all	Right ear
Participant 1170	74	Male	9	3	Constant: you can always or usually hear it in a quiet room	Moderately	Both ears, worse in right
Participant 1171	70	Male	3	0	Constant: you can always or usually hear it in a quiet room	Severely	Left ear
Participant 1172	30	Male	1	0	Constant: you can always or usually hear it in a quiet room	Moderately	Both ears, equally
Participant 1173	49	Female	1	NaN	Intermittent: "comes and goes", cannot always hear it in a quiet room	Not at all	Both ears, equally
Participant 1174	33	Male	2	1	Constant: you can always or usually hear it in a quiet room	Not at all	Both ears, equally
Participant 1175	42	Female	1	0	Constant: you can always or usually hear it in a quiet room	Not at all	Both ears, equally
Participant 1176	73	Male	0	0	Constant: you can always or usually hear it in a quiet room	Moderately	Both ears, worse in right
Participant 1177	79	Male	1	NaN	Constant: you can always or usually hear it in a quiet room	Not at all	Inside the head
Participant 1178	63	Female	1	NaN	Constant: you can always or usually hear it in a quiet room	Slightly	Both ears, worse in right
Participant 1179	35	Female	4	0	Constant: you can always or usually hear it in a quiet room	Slightly	Both ears, equally
Participant 1180	45	Female	2	1	Intermittent: "comes and goes", cannot always hear it in a quiet room	Slightly	Inside the head
Participant 1181	58	Female	3	0	Constant: you can always or usually hear it in a quiet room	Severely	Both ears, worse in left
Participant 1182	54	Female	1	0	Intermittent: "comes and goes", cannot always hear it in a quiet room	Slightly	Both ears, worse in left
Participant 1183	48	Male	1	0	Intermittent: "comes and goes", cannot always hear it in a quiet room	Slightly	Both ears, worse in right
Participant 1184	58	Female	2	NaN	Intermittent: "comes and goes", cannot always hear it in a quiet room	Do not know	Do not know
Participant 1185	42	Female	1	0	Constant: you can always or usually hear it in a quiet room	Moderately	Both ears, worse in left
Participant 1186	48	Female	1	NaN	Intermittent: "comes and goes", cannot always hear it in a quiet room	Not at all	Both ears, equally
Participant 1187	41	Male	3	0	Constant: you can always or usually hear it in a quiet room	Moderately	Both ears, worse in right
Participant 1188	58	Female	0	0	Constant: you can always or usually hear it in a quiet room	Severely	Inside the head
Participant 1189	36	Female	2	0	Constant: you can always or usually hear it in a quiet room	Moderately	Right ear
Participant 1190	63	Female	2	0	Constant: you can always or usually hear it in a quiet room	Slightly	Both ears, worse in right
Participant 1191	58	Male	1	1	Constant: you can always or usually hear it in a quiet room	Not at all	Left ear
Participant 1192	65	Female	5	0	Constant: you can always or usually hear it in a quiet room	Moderately	Right ear
Participant 1193	50	Female	3	0	Constant: you can always or usually hear it in a quiet room	Moderately	Inside the head
Participant 1194	61	Female	1	1	Constant: you can always or usually hear it in a quiet room	Moderately	Both ears, worse in left
Participant 1195	67	Female	3	NaN	Constant: you can always or usually hear it in a quiet room	Slightly	Left ear
Participant 1196	71	Female	1	NaN	Constant: you can always or usually hear it in a quiet room	Moderately	Left ear
Participant 1197	68	Female	2	0	Intermittent: "comes and goes", cannot always hear it in a quiet room	Not at all	Right ear
Participant 1198	77	Male	4	0	Constant: you can always or usually hear it in a quiet room	Not at all	Left ear
Participant 1199	62	Female	3	NaN	Constant: you can always or usually hear it in a quiet room	Severely	Inside the head
Participant 1200	78	Female	NaN	NaN	Constant: you can always or usually hear it in a quiet room	Moderately	Both ears, equally
Participant 1201	58	Male	1	NaN	Intermittent: "comes and goes", cannot always hear it in a quiet room	Not at all	Do not know
Participant 1202	63	Male	2	0	Constant: you can always or usually hear it in a quiet room	Slightly	Other (please specify below)
Participant 1203	28	Female	4	1	Constant: you can always or usually hear it in a quiet room	Slightly	Left ear
Participant 1204	60	Female	2	0	Constant: you can always or usually hear it in a quiet room	Not at all	Other (please specify below)
Participant 1205	69	Female	2	NaN	Constant: you can always or usually hear it in a quiet room	Slightly	Left ear
Participant 1206	60	Female	2	0	Intermittent: "comes and goes", cannot always hear it in a quiet room	Slightly	Both ears, equally
Participant 1207	47	Female	1	0	Intermittent: "comes and goes", cannot always hear it in a quiet room	Moderately	Do not know
Participant 1208	48	Male	3	0	Constant: you can always or usually hear it in a quiet room	Not at all	Both ears, equally
Participant 1209	58	Female	NaN	NaN	Constant: you can always or usually hear it in a quiet room	Severely	Left ear
Participant 1210	71	Male	0	0	Constant: you can always or usually hear it in a quiet room	Moderately	Both ears, equally
Participant 1211	65	Female	2	0	Intermittent: "comes and goes", cannot always hear it in a quiet room	Slightly	Do not know
Participant 1212	63	Male	4	1	Constant: you can always or usually hear it in a quiet room	Not at all	Both ears, worse in left
Participant 1213	80	Male	3	0	Constant: you can always or usually hear it in a quiet room	Severely	Left ear
Participant 1214	35	Male	2	0	Constant: you can always or usually hear it in a quiet room	Moderately	Inside the head
Participant 1215	70	Male	2	NaN	Constant: you can always or usually hear it in a quiet room	Not at all	Both ears, equally
Participant 1216	69	Female	4	1	Constant: you can always or usually hear it in a quiet room	Slightly	Inside the head
Participant 1217	68	Female	2	0	Constant: you can always or usually hear it in a quiet room	Not at all	Right ear
Participant 1218	72	Female	0	0	Constant: you can always or usually hear it in a quiet room	Moderately	Inside the head
Participant 1219	70	Female	5	0	Constant: you can always or usually hear it in a quiet room	Slightly	Both ears, worse in right
Participant 1220	51	Male	7	1	Constant: you can always or usually hear it in a quiet room	Not at all	Both ears, worse in left
Participant 1221	63	Female	0	0	Constant: you can always or usually hear it in a quiet room	Moderately	Left ear
Participant 1222	65	Female	1	0	Intermittent: "comes and goes", cannot always hear it in a quiet room	Moderately	Both ears, worse in right
Participant 1223	28	Female	1	0	Intermittent: "comes and goes", cannot always hear it in a quiet room	Moderately	Both ears, equally
Participant 1224	29	Female	2	0	Constant: you can always or usually hear it in a quiet room	Severely	Both ears, worse in right
Participant 1225	73	Male	3	0	Intermittent: "comes and goes", cannot always hear it in a quiet room	Slightly	Both ears, worse in left
Participant 1226	58	Female	3	2	Constant: you can always or usually hear it in a quiet room	Not at all	Both ears, equally
Participant 1227	49	Female	1	NaN	Constant: you can always or usually hear it in a quiet room	Moderately	Left ear
Participant 1228	38	Female	8	0	Constant: you can always or usually hear it in a quiet room	Moderately	Both ears, worse in left
Participant 1229	52	Male	1	0	Intermittent: "comes and goes", cannot always hear it in a quiet room	Slightly	Both ears, worse in right
Participant 1230	47	Male	1	0	Intermittent: "comes and goes", cannot always hear it in a quiet room	Slightly	Both ears, worse in left
Participant 1231	46	Male	1	0	Constant: you can always or usually hear it in a quiet room	Moderately	Both ears, equally
Participant 1232	31	Male	1	1	Constant: you can always or usually hear it in a quiet room	Slightly	Both ears, worse in right
Participant 1233	30	Female	2	1	Constant: you can always or usually hear it in a quiet room	Severely	Both ears, worse in right
Participant 1234	72	Male	1	NaN	Intermittent: "comes and goes", cannot always hear it in a quiet room	Not at all	Inside the head
Participant 1235	50	Male	1	0	Intermittent: "comes and goes", cannot always hear it in a quiet room	Not at all	Inside the head
Participant 1236	47	Female	1	NaN	Intermittent: "comes and goes", cannot always hear it in a quiet room	Not at all	Do not know
Participant 1237	31	Male	1	0	Constant: you can always or usually hear it in a quiet room	Slightly	Inside the head
Participant 1238	43	Female	2	0	Constant: you can always or usually hear it in a quiet room	Moderately	Both ears, worse in right
Participant 1239	34	Female	1	0	Intermittent: "comes and goes", cannot always hear it in a quiet room	Not at all	Both ears, equally
Participant 1240	47	Female	1	0	Constant: you can always or usually hear it in a quiet room	Moderately	Left ear
Participant 1241	55	Female	1	NaN	Constant: you can always or usually hear it in a quiet room	Not at all	Inside the head
Participant 1242	41	Female	1	0	Intermittent: "comes and goes", cannot always hear it in a quiet room	Moderately	Inside the head
Participant 1243	64	Female	NaN	NaN	Intermittent: "comes and goes", cannot always hear it in a quiet room	Slightly	Both ears, worse in right
Participant 1244	50	Female	3	0	Constant: you can always or usually hear it in a quiet room	Slightly	Both ears, worse in left
Participant 1245	41	Female	4	0	Intermittent: "comes and goes", cannot always hear it in a quiet room	Not at all	Inside the head
Participant 1246	72	Female	5	NaN	Constant: you can always or usually hear it in a quiet room	Slightly	Right ear
Participant 1247	60	Female	1	1	Constant: you can always or usually hear it in a quiet room	Moderately	Left ear
Participant 1248	45	Male	1	0	Constant: you can always or usually hear it in a quiet room	Not at all	Both ears, equally
Participant 1249	59	Female	0	0	Intermittent: "comes and goes", cannot always hear it in a quiet room	Moderately	Left ear
Participant 1250	29	Female	3	0	Constant: you can always or usually hear it in a quiet room	Moderately	Both ears, worse in left
Participant 1251	38	Male	0	0	Constant: you can always or usually hear it in a quiet room	Not at all	Both ears, worse in right
Participant 1252	64	Female	3	1	Constant: you can always or usually hear it in a quiet room	Severely	Both ears, equally
Participant 1253	56	Female	1	0	Constant: you can always or usually hear it in a quiet room	Severely	Left ear
Participant 1254	54	Female			Constant: you can always or usually hear it in a quiet room	Moderately	Both ears, equally
Participant 1255	59	Female	1	0	Intermittent: "comes and goes", cannot always hear it in a quiet room	Not at all	Both ears, worse in right
Participant 1256	25	Male	1	0	Constant: you can always or usually hear it in a quiet room	Slightly	Both ears, worse in left
Participant 1257	48	Female	2	0	Constant: you can always or usually hear it in a quiet room	Slightly	Right ear
Participant 1258	37	Female	2	1	Constant: you can always or usually hear it in a quiet room	Slightly	Both ears, worse in left
Participant 1259	29	Male	2	0	Constant: you can always or usually hear it in a quiet room	Severely	Other (please specify below)
Participant 1260	33	Female	3	0	Intermittent: "comes and goes", cannot always hear it in a quiet room	Not at all	Right ear
Participant 1261	55	Male	2	0	Constant: you can always or usually hear it in a quiet room	Moderately	Both ears, equally
Participant 1262	60	Female	3	0	Constant: you can always or usually hear it in a quiet room	Moderately	Both ears, worse in left
Participant 1263	56	Female	2	0	Constant: you can always or usually hear it in a quiet room	Slightly	Both ears, worse in right
Participant 1264	66	Female	2	NaN	Constant: you can always or usually hear it in a quiet room	Slightly	Both ears, worse in left
Participant 1265	44	Female	2	0	Intermittent: "comes and goes", cannot always hear it in a quiet room	Slightly	Both ears, equally
Participant 1266	43	Male	2	0	Intermittent: "comes and goes", cannot always hear it in a quiet room	Not at all	Both ears, equally
Participant 1267	59	Female	3	1	Constant: you can always or usually hear it in a quiet room	Not at all	Inside the head
Participant 1268	55	Female	1	0	Intermittent: "comes and goes", cannot always hear it in a quiet room	Slightly	Inside the head
Participant 1269	27	Male	3	0	Constant: you can always or usually hear it in a quiet room	Severely	Inside the head
Participant 1270	67	Male	0	0	Constant: you can always or usually hear it in a quiet room	Severely	Both ears, equally
Participant 1271	39	Female	2	0	Constant: you can always or usually hear it in a quiet room	Moderately	Both ears, worse in right
Participant 1272	28	Male	4	1	Constant: you can always or usually hear it in a quiet room	Slightly	Both ears, equally
Participant 1273	71	Male	4	NaN	Intermittent: "comes and goes", cannot always hear it in a quiet room	Slightly	Both ears, worse in right
Participant 1274	72	Male	NaN	NaN	Constant: you can always or usually hear it in a quiet room	Moderately	Both ears, equally
Participant 1275	61	Male	3	2	Constant: you can always or usually hear it in a quiet room	Moderately	Right ear
Participant 1276	71	Male	2	0	Intermittent: "comes and goes", cannot always hear it in a quiet room	Slightly	Both ears, equally
Participant 1277	61	Female	1	1	Intermittent: "comes and goes", cannot always hear it in a quiet room	Slightly	Inside the head
Participant 1278	61	Female	1	0	Intermittent: "comes and goes", cannot always hear it in a quiet room	Moderately	Both ears, equally
Participant 1279	70	Male	3	0	Intermittent: "comes and goes", cannot always hear it in a quiet room	Moderately	Do not know
Participant 1280	69	Female	3	0	Constant: you can always or usually hear it in a quiet room	Slightly	Left ear
Participant 1281	52	Male	NaN	NaN	Constant: you can always or usually hear it in a quiet room	Slightly	Left ear
Participant 1282	70	Male	1	0	Constant: you can always or usually hear it in a quiet room	Moderately	Left ear
Participant 1283	51	Female	0	0	Constant: you can always or usually hear it in a quiet room	Moderately	Left ear
Participant 1284	69	Male	1	0	Constant: you can always or usually hear it in a quiet room	Not at all	Left ear
Participant 1285	70	Male	1	NaN	Constant: you can always or usually hear it in a quiet room	Not at all	Both ears, equally
Participant 1286	43	Male	1	0	Intermittent: "comes and goes", cannot always hear it in a quiet room	Slightly	Both ears, equally
Participant 1287	53	Female	1	1	Constant: you can always or usually hear it in a quiet room	Severely	Left ear
Participant 1288	77	Female	1	NaN	Constant: you can always or usually hear it in a quiet room	Moderately	Both ears, worse in left
Participant 1289	69	Female	1	0	Constant: you can always or usually hear it in a quiet room	Moderately	Both ears, equally
Participant 1290	63	Male	1	0	Intermittent: "comes and goes", cannot always hear it in a quiet room	Moderately	Inside the head
Participant 1291	50	Female	1	0	Constant: you can always or usually hear it in a quiet room	Not at all	Both ears, equally
Participant 1292	60	Female	1	1	Constant: you can always or usually hear it in a quiet room	Moderately	Both ears, worse in left
Participant 1293	70	Female	2	0	Intermittent: "comes and goes", cannot always hear it in a quiet room	Not at all	Both ears, equally
Participant 1294	57	Female	1	0	Intermittent: "comes and goes", cannot always hear it in a quiet room	Slightly	Inside the head
Participant 1295	67	Male	2	0	Constant: you can always or usually hear it in a quiet room	Not at all	Inside the head
Participant 1296	20	Male	2	0	Constant: you can always or usually hear it in a quiet room	Slightly	Both ears, worse in right
Participant 1297	37	Male	4	0	Constant: you can always or usually hear it in a quiet room	Do not know	Both ears, worse in left
Participant 1298	29	Female	1	NaN	Intermittent: "comes and goes", cannot always hear it in a quiet room	Not at all	Both ears, equally
Participant 1299	22	Female	3	0	Constant: you can always or usually hear it in a quiet room	Severely	Both ears, worse in right
Participant 1300	27	Male	5	0	Constant: you can always or usually hear it in a quiet room	Not at all	Both ears, worse in left
Participant 1301	54	Female			Intermittent: "comes and goes", cannot always hear it in a quiet room	Slightly	Right ear
Participant 1302	32	Male	5	0	Constant: you can always or usually hear it in a quiet room	Not at all	Both ears, equally
Participant 1303	43	Male	1	1	Constant: you can always or usually hear it in a quiet room	Severely	Left ear
Participant 1304	55	Female			Constant: you can always or usually hear it in a quiet room	Severely	Left ear
Participant 1305	68	Female	2	NaN	Constant: you can always or usually hear it in a quiet room	Slightly	Both ears, equally
Participant 1306	57	Male	1	NaN	Constant: you can always or usually hear it in a quiet room	Slightly	Both ears, worse in left
Participant 1307	77	Male	1	0	Constant: you can always or usually hear it in a quiet room	Moderately	Both ears, equally
Participant 1308	68	Female	1	0	Intermittent: "comes and goes", cannot always hear it in a quiet room	Moderately	Both ears, equally
Participant 1309	67	Female	3	1	Intermittent: "comes and goes", cannot always hear it in a quiet room	Not at all	Inside the head
Participant 1310	72	Male	1	0	Constant: you can always or usually hear it in a quiet room	Not at all	Both ears, equally
Participant 1311	51	Female	2	0	Constant: you can always or usually hear it in a quiet room	Moderately	Both ears, worse in right
Participant 1312	52	Female	1	1	Constant: you can always or usually hear it in a quiet room	Severely	Inside the head
Participant 1313	36	Male	3	0	Constant: you can always or usually hear it in a quiet room	Moderately	Both ears, equally
Participant 1314	72	Male	0	0	Constant: you can always or usually hear it in a quiet room	Moderately	Both ears, worse in left
Participant 1315	72	Male	1	NaN	Constant: you can always or usually hear it in a quiet room	Not at all	Inside the head
Participant 1316	62	Male	1	0	Constant: you can always or usually hear it in a quiet room	Moderately	Both ears, equally
Participant 1317	77	Male	3	0	Constant: you can always or usually hear it in a quiet room	Not at all	Both ears, worse in left
Participant 1318	59	Male	1	NaN	Constant: you can always or usually hear it in a quiet room	Slightly	Both ears, worse in left
Participant 1319	80	Male	0	0	Constant: you can always or usually hear it in a quiet room	Slightly	Both ears, worse in left
Participant 1320	27	Female	0	0	Constant: you can always or usually hear it in a quiet room	Moderately	Both ears, worse in left
Participant 1321	37	Male	0	0	Intermittent: "comes and goes", cannot always hear it in a quiet room	Moderately	Both ears, equally
Participant 1322	55	Female	0	0	Constant: you can always or usually hear it in a quiet room	Moderately	Both ears, equally
Participant 1323	54	Male	3	NaN	Constant: you can always or usually hear it in a quiet room	Severely	Inside the head
Participant 1324	73	Male	2	NaN	Intermittent: "comes and goes", cannot always hear it in a quiet room	Severely	Right ear
Participant 1325	55	Female	3	1	Constant: you can always or usually hear it in a quiet room	Moderately	Both ears, equally
Participant 1326	69	Male	0	0	Intermittent: "comes and goes", cannot always hear it in a quiet room	Not at all	Both ears, equally
Participant 1327	67	Female	2	0	Constant: you can always or usually hear it in a quiet room	Slightly	Left ear
Participant 1328	72	Male	1	0	Constant: you can always or usually hear it in a quiet room	Slightly	Both ears, worse in left
Participant 1329	60	Female	1	NaN	Intermittent: "comes and goes", cannot always hear it in a quiet room	Not at all	Right ear
Participant 1330	78	Female	1	NaN	Constant: you can always or usually hear it in a quiet room	Severely	Inside the head
Participant 1331	72	Female			Intermittent: "comes and goes", cannot always hear it in a quiet room	Slightly	Inside the head
Participant 1332	71	Male	3	0	Constant: you can always or usually hear it in a quiet room	Moderately	Inside the head
Participant 1333	26	Female	3	0	Constant: you can always or usually hear it in a quiet room	Moderately	Inside the head
Participant 1334	48	Female	1	0	Intermittent: "comes and goes", cannot always hear it in a quiet room	Slightly	Both ears, equally
Participant 1335	34	Female	3	0	Constant: you can always or usually hear it in a quiet room	Slightly	Both ears, worse in right
Participant 1336	49	Female	2	1	Constant: you can always or usually hear it in a quiet room	Severely	Other (please specify below)
Participant 1337	55	Female	3	2	Constant: you can always or usually hear it in a quiet room	Slightly	Both ears, equally
Participant 1338	26	Female	1	0	Constant: you can always or usually hear it in a quiet room	Moderately	Both ears, equally
Participant 1339	38	Female	2	0	Constant: you can always or usually hear it in a quiet room	Severely	Both ears, worse in left
Participant 1340	54	Male	1	NaN	Intermittent: "comes and goes", cannot always hear it in a quiet room	Slightly	Inside the head
Participant 1341	26	Female	1	0	Intermittent: "comes and goes", cannot always hear it in a quiet room	Slightly	Both ears, worse in right
Participant 1342	57	Female	2	0	Constant: you can always or usually hear it in a quiet room	Slightly	Both ears, equally
Participant 1343	52	Female	1	0	Intermittent: "comes and goes", cannot always hear it in a quiet room	Not at all	Inside the head
Participant 1344	31	Female	2	0	Intermittent: "comes and goes", cannot always hear it in a quiet room	Not at all	Both ears, worse in right
Participant 1345	31	Female	0	0	Intermittent: "comes and goes", cannot always hear it in a quiet room	Slightly	Inside the head
Participant 1346	40	Female	0	0	Intermittent: "comes and goes", cannot always hear it in a quiet room	Slightly	Both ears, worse in left
Participant 1347	69	Female	3	1	Constant: you can always or usually hear it in a quiet room	Moderately	Both ears, worse in left
Participant 1348	53	Female	1	0	Constant: you can always or usually hear it in a quiet room	Moderately	Left ear
Participant 1349	30	Female	2	0	Constant: you can always or usually hear it in a quiet room	Moderately	Left ear
Participant 1350	39	Female	3	0	Intermittent: "comes and goes", cannot always hear it in a quiet room	Slightly	Both ears, worse in right
Participant 1351	34	Female	0	0	Constant: you can always or usually hear it in a quiet room	Slightly	Inside the head
Participant 1352	44	Female	NaN	NaN	Constant: you can always or usually hear it in a quiet room	Moderately	Other (please specify below)
Participant 1353	47	Female	1	0	Constant: you can always or usually hear it in a quiet room	Severely	Both ears, worse in left
Participant 1354	70	Male	3	NaN	Constant: you can always or usually hear it in a quiet room	Severely	Both ears, worse in left
Participant 1355	65	Female	2	0	Constant: you can always or usually hear it in a quiet room	Moderately	Both ears, equally
Participant 1356	74	Female	1	NaN	Constant: you can always or usually hear it in a quiet room	Moderately	Right ear
Participant 1357	48	Female	1	1	Intermittent: "comes and goes", cannot always hear it in a quiet room	Slightly	Both ears, equally
Participant 1358	39	Male	1	1	Constant: you can always or usually hear it in a quiet room	Severely	Both ears, equally
Participant 1359	70	Female	2	0	Constant: you can always or usually hear it in a quiet room	Moderately	Inside the head
Participant 1360	61	Female	4	0	Constant: you can always or usually hear it in a quiet room	Severely	Both ears, equally
Participant 1361	43	Female	4	0	Constant: you can always or usually hear it in a quiet room	Not at all	Both ears, equally
Participant 1362	39	Female	0	0	Intermittent: "comes and goes", cannot always hear it in a quiet room	Not at all	Inside the head
Participant 1363	49	Female	1	0	Constant: you can always or usually hear it in a quiet room	Moderately	Both ears, equally
Participant 1364	50	Female	2	1	Constant: you can always or usually hear it in a quiet room	Moderately	Other (please specify below)
Participant 1365	73	Male	1	0	Constant: you can always or usually hear it in a quiet room	Slightly	Right ear
Participant 1366	23	Male	1	1	Constant: you can always or usually hear it in a quiet room	Slightly	Both ears, worse in left
Participant 1367	30	Female	0	0	Constant: you can always or usually hear it in a quiet room	Severely	Both ears, equally
Participant 1368	39	Male	NaN	NaN	Constant: you can always or usually hear it in a quiet room	Moderately	Both ears, worse in left
Participant 1369	30	Female	NaN	NaN	Intermittent: "comes and goes", cannot always hear it in a quiet room	Slightly	Both ears, worse in left
Participant 1370	53	Female	3	0	Constant: you can always or usually hear it in a quiet room	Not at all	Both ears, equally
Participant 1371	77	Male	1	0	Constant: you can always or usually hear it in a quiet room	Severely	Left ear
Participant 1372	55	Male	1	0	Constant: you can always or usually hear it in a quiet room	Slightly	Both ears, equally
Participant 1373	61	Female	2	0	Constant: you can always or usually hear it in a quiet room	Moderately	Inside the head
Participant 1374	73	Female	2	0	Constant: you can always or usually hear it in a quiet room	Not at all	Inside the head
Participant 1375	72	Male	1	0	Constant: you can always or usually hear it in a quiet room	Slightly	Left ear
Participant 1376	72	Male	3	1	Constant: you can always or usually hear it in a quiet room	Moderately	Both ears, worse in left
Participant 1377	29	Female	5	0	Constant: you can always or usually hear it in a quiet room	Moderately	Both ears, equally
Participant 1378	74	Female	3	0	Constant: you can always or usually hear it in a quiet room	Severely	Both ears, worse in right
Participant 1379	69	Male	1	NaN	Constant: you can always or usually hear it in a quiet room	Slightly	Both ears, equally
Participant 1380	45	Female			Constant: you can always or usually hear it in a quiet room	Moderately	Both ears, worse in left
Participant 1381	70	Female	3	0	Constant: you can always or usually hear it in a quiet room	Moderately	Both ears, equally
Participant 1382	61	Female	1	0	Constant: you can always or usually hear it in a quiet room	Slightly	Both ears, worse in right
Participant 1383	47	Female	5	0	Intermittent: "comes and goes", cannot always hear it in a quiet room	Slightly	Do not know
Participant 1384	75	Male	1	NaN	Constant: you can always or usually hear it in a quiet room	Not at all	Both ears, equally
Participant 1385	51	Female	2	0	Constant: you can always or usually hear it in a quiet room	Severely	Inside the head
Participant 1386	57	Female	0	0	Constant: you can always or usually hear it in a quiet room	Severely	Both ears, worse in left
Participant 1387	68	Male	1	0	Constant: you can always or usually hear it in a quiet room	Do not know	Inside the head
Participant 1388	62	Female	1	0	Intermittent: "comes and goes", cannot always hear it in a quiet room	Not at all	Inside the head
Participant 1389	52	Female	2	1	Constant: you can always or usually hear it in a quiet room	Slightly	Left ear
Participant 1390	50	Female			Constant: you can always or usually hear it in a quiet room	Slightly	Right ear
Participant 1391	46	Female	1	1	Constant: you can always or usually hear it in a quiet room	Slightly	Inside the head
Participant 1392	31	Female	2	0	Constant: you can always or usually hear it in a quiet room	Moderately	Both ears, worse in left
Participant 1393	59	Female	1	1	Constant: you can always or usually hear it in a quiet room	Moderately	Both ears, worse in right
Participant 1394	57	Female	3	0	Constant: you can always or usually hear it in a quiet room	Moderately	Both ears, worse in left
Participant 1395	74	Female	NaN	NaN	Intermittent: "comes and goes", cannot always hear it in a quiet room	Not at all	Both ears, equally
Participant 1396	38	Female	1	0	Intermittent: "comes and goes", cannot always hear it in a quiet room	Moderately	Both ears, equally
Participant 1397	77	Female	2	0	Intermittent: "comes and goes", cannot always hear it in a quiet room	Slightly	Do not know
Participant 1398	46	Female	3	0	Intermittent: "comes and goes", cannot always hear it in a quiet room	Not at all	Both ears, worse in right
Participant 1399	63	Female	3	0	Intermittent: "comes and goes", cannot always hear it in a quiet room	Moderately	Inside the head
Participant 1400	65	Female	1	0	Intermittent: "comes and goes", cannot always hear it in a quiet room	Slightly	Both ears, worse in right
Participant 1401	55	Female	1	NaN	Intermittent: "comes and goes", cannot always hear it in a quiet room	Slightly	Inside the head
Participant 1402	51	Female	0	0	Intermittent: "comes and goes", cannot always hear it in a quiet room	Slightly	Left ear
Participant 1403	69	Female	1	NaN	Constant: you can always or usually hear it in a quiet room	Slightly	Right ear
Participant 1404	49	Female	1	1	Constant: you can always or usually hear it in a quiet room	Severely	Both ears, worse in left
Participant 1405	68	Female	2	NaN	Constant: you can always or usually hear it in a quiet room	Moderately	Both ears, equally
Participant 1406	62	Female	0	NaN	Constant: you can always or usually hear it in a quiet room	Severely	Left ear
Participant 1407	54	Female	0	0	Constant: you can always or usually hear it in a quiet room	Moderately	Both ears, equally
Participant 1408	39	Female	1	0	Constant: you can always or usually hear it in a quiet room	Moderately	Both ears, worse in right
Participant 1409	52	Female	2	1	Constant: you can always or usually hear it in a quiet room	Moderately	Right ear
Participant 1410	54	Female	2	NaN	Constant: you can always or usually hear it in a quiet room	Severely	Both ears, equally
Participant 1411	73	Female	3	NaN	Constant: you can always or usually hear it in a quiet room	Severely	Both ears, equally
Participant 1412	31	Female	2	0	Intermittent: "comes and goes", cannot always hear it in a quiet room	Slightly	Both ears, worse in right
Participant 1413	52	Male	1	0	Intermittent: "comes and goes", cannot always hear it in a quiet room	Slightly	Right ear
Participant 1414	53	Female	0	NaN	Constant: you can always or usually hear it in a quiet room	Slightly	Inside the head
Participant 1415	29	Male	2	0	Constant: you can always or usually hear it in a quiet room	Slightly	Both ears, worse in right
Participant 1416	78	Female	2	NaN	Constant: you can always or usually hear it in a quiet room	Moderately	Both ears, equally
Participant 1417	41	Male	NaN	NaN	Constant: you can always or usually hear it in a quiet room	Slightly	Both ears, worse in right
Participant 1418	53	Male	NaN	NaN	Constant: you can always or usually hear it in a quiet room	Not at all	Both ears, worse in right
Participant 1419	61	Female	3	NaN	Constant: you can always or usually hear it in a quiet room	Severely	Both ears, worse in right
Participant 1420	71	Female	NaN	NaN	Intermittent: "comes and goes", cannot always hear it in a quiet room	Slightly	Right ear
Participant 1421	62	Female	1	1	Constant: you can always or usually hear it in a quiet room	Slightly	Left ear
Participant 1422	49	Male	2	NaN	Constant: you can always or usually hear it in a quiet room	Moderately	Left ear
Participant 1423	60	Female	NaN	NaN	Intermittent: "comes and goes", cannot always hear it in a quiet room	Slightly	Both ears, equally
Participant 1424	65	Male	2	NaN	Constant: you can always or usually hear it in a quiet room	Moderately	Both ears, worse in left
Participant 1425	73	Male	2	0	Intermittent: "comes and goes", cannot always hear it in a quiet room	Not at all	Inside the head
Participant 1426	74	Male	NaN	NaN	Constant: you can always or usually hear it in a quiet room	Slightly	Both ears, equally
Participant 1427	50	Female	1	0	Constant: you can always or usually hear it in a quiet room	Severely	Both ears, equally
Participant 1428	73	Male	3	1	Constant: you can always or usually hear it in a quiet room	Moderately	Right ear
Participant 1429	56	Male	1	0	Constant: you can always or usually hear it in a quiet room	Slightly	Both ears, worse in right
Participant 1430	53	Male	2	0	Constant: you can always or usually hear it in a quiet room	Moderately	Both ears, equally
Participant 1431	70	Female	1	NaN	Constant: you can always or usually hear it in a quiet room	Moderately	Left ear
Participant 1432	50	Female	0	0	Constant: you can always or usually hear it in a quiet room	Slightly	Both ears, equally
Participant 1433	66	Female	1	0	Intermittent: "comes and goes", cannot always hear it in a quiet room	Severely	Left ear
Participant 1434	71	Male	1	0	Constant: you can always or usually hear it in a quiet room	Slightly	Left ear
Participant 1435	69	Male	2	0	Constant: you can always or usually hear it in a quiet room	Severely	Both ears, worse in left
Participant 1436	69	Male	2	NaN	Constant: you can always or usually hear it in a quiet room	Not at all	Inside the head
Participant 1437	76	Male	1	0	Intermittent: "comes and goes", cannot always hear it in a quiet room	Moderately	Both ears, equally
Participant 1438	73	Male	2	NaN	Constant: you can always or usually hear it in a quiet room	Moderately	Both ears, equally
Participant 1439	53	Female	1	0	Intermittent: "comes and goes", cannot always hear it in a quiet room	Moderately	Both ears, equally
Participant 1440	66	Male	0	NaN	Constant: you can always or usually hear it in a quiet room	Severely	Both ears, equally
Participant 1441	57	Male	1	0	Constant: you can always or usually hear it in a quiet room	Not at all	Inside the head
Participant 1442	46	Male	3	0	Constant: you can always or usually hear it in a quiet room	Moderately	Both ears, equally
Participant 1443	87	Female	1	0	Constant: you can always or usually hear it in a quiet room	Moderately	Inside the head
Participant 1444	55	Male	3	0	Constant: you can always or usually hear it in a quiet room	Not at all	Both ears, worse in left
Participant 1445	61	Female	2	0	Intermittent: "comes and goes", cannot always hear it in a quiet room	Not at all	Inside the head
Participant 1446	60	Female	4	0	Constant: you can always or usually hear it in a quiet room	Severely	Both ears, worse in right
Participant 1447	49	Female	1	0	Constant: you can always or usually hear it in a quiet room	Moderately	Both ears, worse in left
Participant 1448	36	Female	3	0	Constant: you can always or usually hear it in a quiet room	Slightly	Inside the head
Participant 1449	53	Female	3	NaN	Intermittent: "comes and goes", cannot always hear it in a quiet room	Slightly	Both ears, equally
Participant 1450	72	Male	1	0	Constant: you can always or usually hear it in a quiet room	Slightly	Inside the head
Participant 1451	54	Male	2	0	Constant: you can always or usually hear it in a quiet room	Moderately	Both ears, equally
Participant 1452	53	Male	0	0	Constant: you can always or usually hear it in a quiet room	Do not know	Both ears, worse in right
Participant 1453	47	Male	4	0	Intermittent: "comes and goes", cannot always hear it in a quiet room	Slightly	Inside the head
Participant 1454	72	Female	3	1	Constant: you can always or usually hear it in a quiet room	Moderately	Left ear
Participant 1455	67	Male	1	NaN	Constant: you can always or usually hear it in a quiet room	Moderately	Both ears, equally
Participant 1456	60	Male	1	0	Constant: you can always or usually hear it in a quiet room	Moderately	Inside the head
Participant 1457	73	Male	1	0	Constant: you can always or usually hear it in a quiet room	Slightly	Both ears, equally
Participant 1458	74	Male	3	0	Constant: you can always or usually hear it in a quiet room	Slightly	Both ears, worse in right
Participant 1459	69	Male	0	0	Constant: you can always or usually hear it in a quiet room	Moderately	Left ear
Participant 1460	76	Male	0	0	Constant: you can always or usually hear it in a quiet room	Severely	Both ears, equally
Participant 1461	62	Female	3	NaN	Constant: you can always or usually hear it in a quiet room	Severely	Both ears, equally
Participant 1462	72	Female	3	NaN	Intermittent: "comes and goes", cannot always hear it in a quiet room	Slightly	Both ears, worse in right
Participant 1463	70	Male	1	0	Constant: you can always or usually hear it in a quiet room	Severely	Both ears, equally
Participant 1464	64	Male	2	NaN	Constant: you can always or usually hear it in a quiet room	Moderately	Both ears, worse in right
Participant 1465	67	Female	3	1	Constant: you can always or usually hear it in a quiet room	Slightly	Inside the head
Participant 1466	60	Male	2	NaN	Constant: you can always or usually hear it in a quiet room	Severely	Both ears, worse in right
Participant 1467	74	Female	3	0	Intermittent: "comes and goes", cannot always hear it in a quiet room	Moderately	Left ear
Participant 1468	74	Male	4	0	Constant: you can always or usually hear it in a quiet room	Slightly	Left ear
Participant 1469	64	Female	NaN	NaN	Constant: you can always or usually hear it in a quiet room	Moderately	Both ears, equally
Participant 1470	28	Female	1	0	Intermittent: "comes and goes", cannot always hear it in a quiet room	Not at all	Right ear
Participant 1471	74	Male	1	0	Intermittent: "comes and goes", cannot always hear it in a quiet room	Not at all	Both ears, worse in right
Participant 1472	72	Female			Intermittent: "comes and goes", cannot always hear it in a quiet room	Moderately	Inside the head
Participant 1473	74	Male	6	1	Constant: you can always or usually hear it in a quiet room	Moderately	Right ear
Participant 1474	74	Female	1	0	Constant: you can always or usually hear it in a quiet room	Moderately	Both ears, equally
Participant 1475	75	Male	2	2	Intermittent: "comes and goes", cannot always hear it in a quiet room	Moderately	Inside the head
Participant 1476	40	Male	2	0	Intermittent: "comes and goes", cannot always hear it in a quiet room	Slightly	Both ears, equally
Participant 1477	43	Male	1	0	Constant: you can always or usually hear it in a quiet room	Moderately	Both ears, worse in right
Participant 1478	68	Male	NaN	NaN	Constant: you can always or usually hear it in a quiet room	Severely	Inside the head
Participant 1479	45	Female	1	NaN	Intermittent: "comes and goes", cannot always hear it in a quiet room	Not at all	Both ears, worse in right
Participant 1480	33	Female	5	0	Intermittent: "comes and goes", cannot always hear it in a quiet room	Slightly	Both ears, worse in right
Participant 1481	37	Female	1	0	Constant: you can always or usually hear it in a quiet room	Slightly	Right ear
Participant 1482	40	Male	1	0	Intermittent: "comes and goes", cannot always hear it in a quiet room	Slightly	Left ear
Participant 1483	35	Male	2	0	Constant: you can always or usually hear it in a quiet room	Severely	Both ears, worse in right
Participant 1484	57	Female	1	1	Constant: you can always or usually hear it in a quiet room	Severely	Inside the head
Participant 1485	47	Female	1	0	Constant: you can always or usually hear it in a quiet room	Severely	Right ear
Participant 1486	80	Male	NaN	NaN	Constant: you can always or usually hear it in a quiet room	Slightly	Right ear
Participant 1487	38	Male	1	1	Constant: you can always or usually hear it in a quiet room	Severely	Right ear
Participant 1488	39	Male	3	0	Constant: you can always or usually hear it in a quiet room	Severely	Other (please specify below)
Participant 1489	71	Female	4	NaN	Constant: you can always or usually hear it in a quiet room	Severely	Left ear
Participant 1490	57	Male	1	0	Constant: you can always or usually hear it in a quiet room	Moderately	Inside the head
Participant 1491	70	Female	0	0	Constant: you can always or usually hear it in a quiet room	Slightly	Both ears, worse in right
Participant 1492	52	Male	2	NaN	Constant: you can always or usually hear it in a quiet room	Severely	Both ears, equally
Participant 1493	71	Male	2	NaN	Constant: you can always or usually hear it in a quiet room	Moderately	Right ear
Participant 1494	64	Male	0	NaN	Constant: you can always or usually hear it in a quiet room	Not at all	Left ear
Participant 1495	58	Female	2	NaN	Constant: you can always or usually hear it in a quiet room	Moderately	Both ears, equally
Participant 1496	76	Male	2	0	Constant: you can always or usually hear it in a quiet room	Severely	Both ears, worse in right
Participant 1497	32	Female	2	0	Constant: you can always or usually hear it in a quiet room	Slightly	Both ears, equally
Participant 1498	40	Female	4	0	Constant: you can always or usually hear it in a quiet room	Severely	Both ears, worse in left
Participant 1499	72	Male	2	0	Constant: you can always or usually hear it in a quiet room	Moderately	Both ears, equally
Participant 1500	54	Female	6	0	Intermittent: "comes and goes", cannot always hear it in a quiet room	Slightly	Inside the head
Participant 1501	58	Male	13	NaN	Constant: you can always or usually hear it in a quiet room	Slightly	Other (please specify below)
Participant 1502	32	Male	1	0	Constant: you can always or usually hear it in a quiet room	Moderately	Inside the head
Participant 1503	69	Male	2	0	Constant: you can always or usually hear it in a quiet room	Moderately	Both ears, worse in left
Participant 1504	27	Female	1	0	Constant: you can always or usually hear it in a quiet room	Severely	Both ears, worse in right
Participant 1505	53	Female	1	0	Constant: you can always or usually hear it in a quiet room	Severely	Both ears, worse in left
Participant 1506	37	Male	0	1	Constant: you can always or usually hear it in a quiet room	Moderately	Both ears, worse in right
Participant 1507	30	Female	0	0	Intermittent: "comes and goes", cannot always hear it in a quiet room	Moderately	Both ears, worse in right
Participant 1508	33	Female	2	0	Intermittent: "comes and goes", cannot always hear it in a quiet room	Slightly	Both ears, worse in right
Participant 1509	77	Male	1	0	Intermittent: "comes and goes", cannot always hear it in a quiet room	Not at all	Both ears, worse in right
Participant 1510	72	Female	1	0	Constant: you can always or usually hear it in a quiet room	Severely	Left ear
Participant 1511	54	Female	1	0	Constant: you can always or usually hear it in a quiet room	Slightly	Both ears, worse in left
Participant 1512	26	Female	0	0	Constant: you can always or usually hear it in a quiet room	Not at all	Both ears, equally
Participant 1513	59	Female	1	0	Constant: you can always or usually hear it in a quiet room	Severely	Right ear
Participant 1514	59	Female	1	NaN	Constant: you can always or usually hear it in a quiet room	Slightly	Both ears, worse in left
Participant 1515	68	Female	0	0	Constant: you can always or usually hear it in a quiet room	Slightly	Both ears, equally
Participant 1516	30	Male	2	0	Constant: you can always or usually hear it in a quiet room	Moderately	Both ears, equally
Participant 1517	70	Male	1	0	Constant: you can always or usually hear it in a quiet room	Severely	Both ears, worse in left
Participant 1518	67	Male	2	NaN	Constant: you can always or usually hear it in a quiet room	Severely	Both ears, equally
Participant 1519	63	Male	3	1	Constant: you can always or usually hear it in a quiet room	Moderately	Both ears, worse in right
Participant 1520	67	Male	1	0	Constant: you can always or usually hear it in a quiet room	Slightly	Inside the head
Participant 1521	71	Male	8	NaN	Constant: you can always or usually hear it in a quiet room	Slightly	Both ears, equally
Participant 1522	42	Male	2	0	Constant: you can always or usually hear it in a quiet room	Moderately	Both ears, equally
Participant 1523	56	Male	4	1	Constant: you can always or usually hear it in a quiet room	Slightly	Inside the head
Participant 1524	70	Female	4	NaN	Constant: you can always or usually hear it in a quiet room	Moderately	Both ears, worse in left
Participant 1525	54	Female	1	NaN	Intermittent: "comes and goes", cannot always hear it in a quiet room	Moderately	Both ears, equally
Participant 1526	72	Male	3	1	Constant: you can always or usually hear it in a quiet room	Slightly	Both ears, worse in left
Participant 1527	46	Male	1	0	Constant: you can always or usually hear it in a quiet room	Not at all	Inside the head
Participant 1528	38	Female	3	0	Intermittent: "comes and goes", cannot always hear it in a quiet room	Not at all	Left ear
Participant 1529	61	Female	5	0	Intermittent: "comes and goes", cannot always hear it in a quiet room	Severely	Left ear
Participant 1530	75	Male	2	0	Constant: you can always or usually hear it in a quiet room	Not at all	Right ear
Participant 1531	58	Male	2	NaN	Constant: you can always or usually hear it in a quiet room	Moderately	Both ears, worse in right
Participant 1532	75	Male	0	0	Constant: you can always or usually hear it in a quiet room	Slightly	Both ears, equally
Participant 1533	68	Female	0	0	Constant: you can always or usually hear it in a quiet room	Not at all	Inside the head
Participant 1534	48	Female	1	0	Constant: you can always or usually hear it in a quiet room	Severely	Both ears, worse in right
Participant 1535	54	Female	2	NaN	Constant: you can always or usually hear it in a quiet room	Moderately	Left ear
Participant 1536	30	Female	1	0	Constant: you can always or usually hear it in a quiet room	Severely	Both ears, worse in left
Participant 1537	69	Female	3	NaN	Constant: you can always or usually hear it in a quiet room	Slightly	Both ears, worse in right
Participant 1538	35	Male	1	0	Constant: you can always or usually hear it in a quiet room	Not at all	Inside the head
Participant 1539	64	Female	2	0	Intermittent: "comes and goes", cannot always hear it in a quiet room	Slightly	Right ear
Participant 1540	47	Female	2	0	Constant: you can always or usually hear it in a quiet room	Moderately	Both ears, worse in right
Participant 1541	45	Male	1	0	Constant: you can always or usually hear it in a quiet room	Moderately	Both ears, worse in right
Participant 1542	53	Female	2	0	Constant: you can always or usually hear it in a quiet room	Severely	Other (please specify below)
Participant 1543	59	Female	1	0	Constant: you can always or usually hear it in a quiet room	Moderately	Right ear
Participant 1544	32	Female	1	0	Constant: you can always or usually hear it in a quiet room	Slightly	Right ear
Participant 1545	27	Female	1	0	Constant: you can always or usually hear it in a quiet room	Slightly	Both ears, worse in left
Participant 1546	53	Male	2	0	Constant: you can always or usually hear it in a quiet room	Severely	Inside the head
Participant 1547	29	Female	8	0	Constant: you can always or usually hear it in a quiet room	Severely	Both ears, worse in left
Participant 1548	25	Female	2	0	Intermittent: "comes and goes", cannot always hear it in a quiet room	Moderately	Both ears, equally
Participant 1549	29	Female	1	0	Constant: you can always or usually hear it in a quiet room	Severely	Both ears, worse in left
Participant 1550	61	Female	4	0	Constant: you can always or usually hear it in a quiet room	Slightly	Both ears, equally
Participant 1551	59	Female	1	0	Intermittent: "comes and goes", cannot always hear it in a quiet room	Not at all	Both ears, worse in right
Participant 1552	57	Female	1	0	Intermittent: "comes and goes", cannot always hear it in a quiet room	Slightly	Both ears, equally
Participant 1553	45	Male	1	0	Constant: you can always or usually hear it in a quiet room	Slightly	Both ears, equally
Participant 1554	35	Male	2	0	Constant: you can always or usually hear it in a quiet room	Moderately	Right ear
Participant 1555	51	Female	2	0	Constant: you can always or usually hear it in a quiet room	Moderately	Left ear
Participant 1556	24	Female	1	0	Intermittent: "comes and goes", cannot always hear it in a quiet room	Slightly	Do not know
Participant 1557	48	Female	0	0	Constant: you can always or usually hear it in a quiet room	Not at all	Both ears, equally
Participant 1558	59	Female	2	NaN	Intermittent: "comes and goes", cannot always hear it in a quiet room	Not at all	Left ear
Participant 1559	39	Female	3	0	Constant: you can always or usually hear it in a quiet room	Slightly	Inside the head
Participant 1560	29	Male	1	0	Intermittent: "comes and goes", cannot always hear it in a quiet room	Slightly	Both ears, worse in right
Participant 1561	71	Female	2	0	Intermittent: "comes and goes", cannot always hear it in a quiet room	Moderately	Both ears, equally
Participant 1562	71	Female			Constant: you can always or usually hear it in a quiet room	Severely	Both ears, worse in right
Participant 1563	38	Male	1	1	Constant: you can always or usually hear it in a quiet room	Moderately	Both ears, equally
Participant 1564	28	Female	4	0	Constant: you can always or usually hear it in a quiet room	Slightly	Both ears, worse in right
Participant 1565	58	Female	2	0	Constant: you can always or usually hear it in a quiet room	Slightly	Both ears, worse in right
Participant 1566	62	Female	1	NaN	Constant: you can always or usually hear it in a quiet room	Slightly	Both ears, worse in right
Participant 1567	53	Female	2	0	Constant: you can always or usually hear it in a quiet room	Not at all	Both ears, equally
Participant 1568	52	Female	2	0	Intermittent: "comes and goes", cannot always hear it in a quiet room	Not at all	Left ear
Participant 1569	68	Female	2	0	Constant: you can always or usually hear it in a quiet room	Not at all	Right ear
Participant 1570	27	Female	1	0	Constant: you can always or usually hear it in a quiet room	Not at all	Inside the head
Participant 1571	72	Male			Constant: you can always or usually hear it in a quiet room	Moderately	Both ears, equally
Participant 1572	73	Male	1	0	Constant: you can always or usually hear it in a quiet room	Slightly	Both ears, worse in right
Participant 1573	27	Male	1	0	Intermittent: "comes and goes", cannot always hear it in a quiet room	Not at all	Both ears, equally
Participant 1574	48	Female	2	1	Constant: you can always or usually hear it in a quiet room	Moderately	Both ears, equally
Participant 1575	58	Female	1	0	Constant: you can always or usually hear it in a quiet room	Severely	Left ear
Participant 1576	59	Female	0	0	Intermittent: "comes and goes", cannot always hear it in a quiet room	Moderately	Left ear
Participant 1577	75	Male	0	0	Constant: you can always or usually hear it in a quiet room	Moderately	Both ears, equally
Participant 1578	36	Female	NaN	NaN	Intermittent: "comes and goes", cannot always hear it in a quiet room	Severely	Both ears, worse in right
Participant 1579	51	Male	1	0	Constant: you can always or usually hear it in a quiet room	Not at all	Both ears, equally
Participant 1580	70	Male	2	0	Constant: you can always or usually hear it in a quiet room	Moderately	Inside the head
Participant 1581	74	Female	0	0	Intermittent: "comes and goes", cannot always hear it in a quiet room	Moderately	Both ears, equally
Participant 1582	49	Male	2	0	Constant: you can always or usually hear it in a quiet room	Not at all	Inside the head
Participant 1583	73	Female	1	0	Constant: you can always or usually hear it in a quiet room	Moderately	Inside the head
Participant 1584	40	Female	1	0	Intermittent: "comes and goes", cannot always hear it in a quiet room	Slightly	Right ear
Participant 1585	58	Female	1	0	Intermittent: "comes and goes", cannot always hear it in a quiet room	Moderately	Both ears, equally
Participant 1586	66	Female	2	NaN	Constant: you can always or usually hear it in a quiet room	Moderately	Both ears, worse in left
Participant 1587	68	Female	0	0	Constant: you can always or usually hear it in a quiet room	Slightly	Both ears, worse in right
Participant 1588	71	Male	1	0	Constant: you can always or usually hear it in a quiet room	Moderately	Both ears, equally
Participant 1589	61	Male	1	0	Constant: you can always or usually hear it in a quiet room	Moderately	Both ears, worse in left
Participant 1590	71	Female	1	0	Constant: you can always or usually hear it in a quiet room	Severely	Both ears, worse in left
Participant 1591	56	Female	2	NaN	Intermittent: "comes and goes", cannot always hear it in a quiet room	Slightly	Both ears, equally
Participant 1592	62	Female	1	1	Constant: you can always or usually hear it in a quiet room	Moderately	Right ear
Participant 1593	43	Female	1	0	Constant: you can always or usually hear it in a quiet room	Slightly	Both ears, worse in left
Participant 1594	55	Female	1	0	Constant: you can always or usually hear it in a quiet room	Slightly	Both ears, equally
Participant 1595	38	Male	1	0	Constant: you can always or usually hear it in a quiet room	Moderately	Both ears, worse in right
Participant 1596	37	Female	0	0	Constant: you can always or usually hear it in a quiet room	Slightly	Inside the head
Participant 1597	52	Female	1	0	Intermittent: "comes and goes", cannot always hear it in a quiet room	Not at all	Both ears, worse in right
Participant 1598	35	Female	2	1	Intermittent: "comes and goes", cannot always hear it in a quiet room	Not at all	Do not know
Participant 1599	57	Female	0	0	Constant: you can always or usually hear it in a quiet room	Moderately	Inside the head
Participant 1600	52	Male	4	0	Intermittent: "comes and goes", cannot always hear it in a quiet room	Moderately	Left ear
Participant 1601	50	Female	1	1	Intermittent: "comes and goes", cannot always hear it in a quiet room	Slightly	Both ears, worse in left
Participant 1602	46	Female	2	0	Constant: you can always or usually hear it in a quiet room	Severely	Inside the head
Participant 1603	37	Female	3	0	Constant: you can always or usually hear it in a quiet room	Do not know	Both ears, worse in right
Participant 1604	36	Female	4	0	Intermittent: "comes and goes", cannot always hear it in a quiet room	Not at all	Inside the head
Participant 1605	26	Male	2	0	Constant: you can always or usually hear it in a quiet room	Slightly	Inside the head
Participant 1606	50	Female	2	0	Constant: you can always or usually hear it in a quiet room	Severely	Right ear
Participant 1607	49	Female	1	0	Constant: you can always or usually hear it in a quiet room	Moderately	Both ears, worse in left
Participant 1608	58	Male	2	0	Constant: you can always or usually hear it in a quiet room	Severely	Both ears, worse in left
Participant 1609	46	Male	1	0	Constant: you can always or usually hear it in a quiet room	Moderately	Right ear
Participant 1610	47	Female	2	NaN	Intermittent: "comes and goes", cannot always hear it in a quiet room	Slightly	Left ear
Participant 1611	31	Female	4	1	Constant: you can always or usually hear it in a quiet room	Slightly	Both ears, equally
Participant 1612	44	Male	1	0	Constant: you can always or usually hear it in a quiet room	Not at all	Both ears, equally
Participant 1613	61	Female	2	0	Constant: you can always or usually hear it in a quiet room	Severely	Both ears, worse in left
Participant 1614	56	Female	1	0	Constant: you can always or usually hear it in a quiet room	Slightly	Inside the head
Participant 1615	31	Male	2	0	Intermittent: "comes and goes", cannot always hear it in a quiet room	Moderately	Both ears, equally
Participant 1616	31	Male	0	0	Constant: you can always or usually hear it in a quiet room	Severely	Right ear
Participant 1617	54	Female			Constant: you can always or usually hear it in a quiet room	Moderately	Both ears, equally
Participant 1618	31	Male	3	0	Constant: you can always or usually hear it in a quiet room	Moderately	Both ears, worse in right
Participant 1619	49	Male	0	0	Intermittent: "comes and goes", cannot always hear it in a quiet room	Slightly	Both ears, equally
Participant 1620	30	Female	2	0	Intermittent: "comes and goes", cannot always hear it in a quiet room	Slightly	Both ears, equally
Participant 1621	68	Female	2	NaN	Constant: you can always or usually hear it in a quiet room	Not at all	Both ears, equally
Participant 1622	31	Female	0	0	Intermittent: "comes and goes", cannot always hear it in a quiet room	Not at all	Do not know
Participant 1623	43	Female	1	0	Constant: you can always or usually hear it in a quiet room	Severely	Both ears, worse in right
Participant 1624	46	Female	3	1	Constant: you can always or usually hear it in a quiet room	Do not know	Inside the head
Participant 1625	60	Male	1	NaN	Constant: you can always or usually hear it in a quiet room	Moderately	Right ear
Participant 1626	56	Male	0	0	Constant: you can always or usually hear it in a quiet room	Slightly	Both ears, worse in left
Participant 1627	51	Female	3	0	Constant: you can always or usually hear it in a quiet room	Slightly	Both ears, equally
Participant 1628	75	Male	1	0	Constant: you can always or usually hear it in a quiet room	Slightly	Right ear
Participant 1629	80	Female	0	0	Constant: you can always or usually hear it in a quiet room	Severely	Inside the head
Participant 1630	75	Female	2	1	Constant: you can always or usually hear it in a quiet room	Slightly	Inside the head
Participant 1631	63	Female	2	0	Constant: you can always or usually hear it in a quiet room	Severely	Inside the head
Participant 1632	75	Male	1	1	Constant: you can always or usually hear it in a quiet room	Slightly	Both ears, equally
Participant 1633	66	Female	NaN	NaN	Constant: you can always or usually hear it in a quiet room	Not at all	Both ears, worse in left
Participant 1634	65	Female	1	0	Constant: you can always or usually hear it in a quiet room	Moderately	Both ears, equally
Participant 1635	61	Male	0	0	Intermittent: "comes and goes", cannot always hear it in a quiet room	Not at all	Both ears, worse in right
Participant 1636	71	Female	0	0	Intermittent: "comes and goes", cannot always hear it in a quiet room	Slightly	Inside the head
Participant 1637	60	Female	2	0	Constant: you can always or usually hear it in a quiet room	Moderately	Both ears, worse in left
Participant 1638	76	Male	2	NaN	Constant: you can always or usually hear it in a quiet room	Moderately	Both ears, worse in left
Participant 1639	43	Male	11	0	Constant: you can always or usually hear it in a quiet room	Severely	Both ears, worse in left
Participant 1640	28	Female	0	0	Constant: you can always or usually hear it in a quiet room	Severely	Both ears, worse in left
Participant 1641	50	Female	2	0	Intermittent: "comes and goes", cannot always hear it in a quiet room	Moderately	Both ears, worse in left
Participant 1642	34	Female	2	0	Intermittent: "comes and goes", cannot always hear it in a quiet room	Moderately	Other (please specify below)
Participant 1643	48	Female	5	0	Intermittent: "comes and goes", cannot always hear it in a quiet room	Slightly	Both ears, worse in left
Participant 1644	61	Male	2	0	Intermittent: "comes and goes", cannot always hear it in a quiet room	Not at all	Inside the head
Participant 1645	51	Male	1	0	Constant: you can always or usually hear it in a quiet room	Severely	Both ears, worse in left
Participant 1646	67	Female	1	0	Intermittent: "comes and goes", cannot always hear it in a quiet room	Not at all	Left ear
Participant 1647	40	Female			Intermittent: "comes and goes", cannot always hear it in a quiet room	Slightly	Both ears, worse in left
Participant 1648	56	Female	4	0	Intermittent: "comes and goes", cannot always hear it in a quiet room	Not at all	Inside the head
Participant 1649	52	Female	3	0	Constant: you can always or usually hear it in a quiet room	Moderately	Both ears, equally
Participant 1650	71	Female	2	1	Intermittent: "comes and goes", cannot always hear it in a quiet room	Slightly	Inside the head
Participant 1651	34	Female	2	0	Constant: you can always or usually hear it in a quiet room	Slightly	Both ears, worse in left
Participant 1652	44	Female	1	0	Intermittent: "comes and goes", cannot always hear it in a quiet room	Slightly	Both ears, worse in left
Participant 1653	63	Male	6	0	Intermittent: "comes and goes", cannot always hear it in a quiet room	Not at all	Both ears, equally
Participant 1654	28	Male	2	0	Intermittent: "comes and goes", cannot always hear it in a quiet room	Not at all	Do not know
Participant 1655	63	Female	2	0	Constant: you can always or usually hear it in a quiet room	Moderately	Left ear
Participant 1656	50	Male			Constant: you can always or usually hear it in a quiet room	Not at all	Both ears, equally
Participant 1657	39	Female	3	0	Constant: you can always or usually hear it in a quiet room	Severely	Other (please specify below)
Participant 1658	63	Female	2	0	Constant: you can always or usually hear it in a quiet room	Slightly	Inside the head
Participant 1659	39	Female	1	0	Constant: you can always or usually hear it in a quiet room	Slightly	Both ears, worse in left
Participant 1660	43	Female	1	0	Constant: you can always or usually hear it in a quiet room	Slightly	Both ears, equally
Participant 1661	72	Male	1	1	Constant: you can always or usually hear it in a quiet room	Not at all	Both ears, worse in right
Participant 1662	40	Female	3	0	Constant: you can always or usually hear it in a quiet room	Not at all	Both ears, equally
Participant 1663	75	Female	2	0	Constant: you can always or usually hear it in a quiet room	Moderately	Inside the head
Participant 1664	74	Female	1	NaN	Constant: you can always or usually hear it in a quiet room	Severely	Left ear
Participant 1665	41	Female	2	0	Intermittent: "comes and goes", cannot always hear it in a quiet room	Not at all	Do not know
Participant 1666	41	Female	2	0	Intermittent: "comes and goes", cannot always hear it in a quiet room	Slightly	Both ears, equally
Participant 1667	36	Female	3	NaN	Constant: you can always or usually hear it in a quiet room	Moderately	Both ears, equally
Participant 1668	75	Female	NaN	NaN	Constant: you can always or usually hear it in a quiet room	Severely	Left ear
Participant 1669	52	Male	2	0	Constant: you can always or usually hear it in a quiet room	Not at all	Inside the head
Participant 1670	39	Female	2	0	Constant: you can always or usually hear it in a quiet room	Moderately	Both ears, equally
Participant 1671	58	Male	7	2	Constant: you can always or usually hear it in a quiet room	Moderately	Both ears, worse in left
Participant 1672	48	Female	0	0	Intermittent: "comes and goes", cannot always hear it in a quiet room	Not at all	Both ears, equally
Participant 1673	57	Female	2	0	Constant: you can always or usually hear it in a quiet room	Not at all	Left ear
Participant 1674	50	Female	1	0	Intermittent: "comes and goes", cannot always hear it in a quiet room	Slightly	Right ear
Participant 1675	35	Female	1	0	Intermittent: "comes and goes", cannot always hear it in a quiet room	Not at all	Both ears, equally
Participant 1676	40	Male	0	0	Constant: you can always or usually hear it in a quiet room	Severely	Both ears, equally
Participant 1677	51	Female	1	0	Constant: you can always or usually hear it in a quiet room	Slightly	Left ear
Participant 1678	58	Female	3	0	Constant: you can always or usually hear it in a quiet room	Moderately	Right ear
Participant 1679	71	Male	1	0	Intermittent: "comes and goes", cannot always hear it in a quiet room	Not at all	Inside the head
Participant 1680	76	Male	2	0	Constant: you can always or usually hear it in a quiet room	Moderately	Inside the head
Participant 1681	74	Female	5	NaN	Constant: you can always or usually hear it in a quiet room	Slightly	Both ears, worse in left
Participant 1682	79	Female	1	0	Intermittent: "comes and goes", cannot always hear it in a quiet room	Severely	Right ear
Participant 1683	73	Male	0	NaN	Intermittent: "comes and goes", cannot always hear it in a quiet room	Not at all	Both ears, equally
Participant 1684	82	Female	2	NaN	Constant: you can always or usually hear it in a quiet room	Moderately	Both ears, equally
Participant 1685	70	Male	2	NaN	Constant: you can always or usually hear it in a quiet room	Moderately	Both ears, equally
Participant 1686	62	Male	1	0	Constant: you can always or usually hear it in a quiet room	Moderately	Both ears, worse in right
Participant 1687	48	Female	1	1	Intermittent: "comes and goes", cannot always hear it in a quiet room	Moderately	Right ear
Participant 1688	70	Male	1	1	Constant: you can always or usually hear it in a quiet room	Slightly	Both ears, equally
Participant 1689	80	Male	2	0	Constant: you can always or usually hear it in a quiet room	Slightly	Left ear
Participant 1690	55	Male	1	0	Constant: you can always or usually hear it in a quiet room	Slightly	Both ears, worse in right
Participant 1691	59	Male	1	1	Constant: you can always or usually hear it in a quiet room	Severely	Both ears, equally
Participant 1692	72	Female	1	0	Constant: you can always or usually hear it in a quiet room	Moderately	Both ears, equally
Participant 1693	51	Female	1	0	Intermittent: "comes and goes", cannot always hear it in a quiet room	Do not know	Inside the head
Participant 1694	63	Male	2	0	Constant: you can always or usually hear it in a quiet room	Not at all	Both ears, equally
Participant 1695	71	Male	1	1	Intermittent: "comes and goes", cannot always hear it in a quiet room	Not at all	Both ears, equally
Participant 1696	72	Male	1	0	Constant: you can always or usually hear it in a quiet room	Moderately	Both ears, worse in right
Participant 1697	71	Male	1	0	Constant: you can always or usually hear it in a quiet room	Moderately	Both ears, worse in left
Participant 1698	62	Female	5	0	Constant: you can always or usually hear it in a quiet room	Severely	Both ears, equally
Participant 1699	47	Female	2	2	Constant: you can always or usually hear it in a quiet room	Slightly	Inside the head
Participant 1700	69	Female	1	0	Intermittent: "comes and goes", cannot always hear it in a quiet room	Slightly	Both ears, equally
Participant 1701	50	Female	1	0	Constant: you can always or usually hear it in a quiet room	Severely	Both ears, worse in right
Participant 1702	56	Female	1	1	Constant: you can always or usually hear it in a quiet room	Severely	Both ears, worse in right
Participant 1703	61	Female	5	2	Constant: you can always or usually hear it in a quiet room	Severely	Inside the head
Participant 1704	69	Female			Intermittent: "comes and goes", cannot always hear it in a quiet room	Not at all	Do not know
Participant 1705	57	Male	3	0	Constant: you can always or usually hear it in a quiet room	Severely	Inside the head
Participant 1706	53	Male	3	1	Constant: you can always or usually hear it in a quiet room	Slightly	Right ear
Participant 1707	73	Male	3	0	Intermittent: "comes and goes", cannot always hear it in a quiet room	Slightly	Both ears, equally
Participant 1708	74	Male	1	0	Constant: you can always or usually hear it in a quiet room	Slightly	Both ears, worse in left
Participant 1709	74	Male	1	0	Intermittent: "comes and goes", cannot always hear it in a quiet room	Slightly	Both ears, equally
Participant 1710	73	Male	2	0	Constant: you can always or usually hear it in a quiet room	Moderately	Left ear
Participant 1711	75	Male	0	0	Constant: you can always or usually hear it in a quiet room	Moderately	Both ears, worse in right
Participant 1712	74	Male	NaN	NaN	Constant: you can always or usually hear it in a quiet room	Slightly	Both ears, equally
Participant 1713	51	Male	2	0	Constant: you can always or usually hear it in a quiet room	Severely	Both ears, worse in left
Participant 1714	48	Female	3	0	Constant: you can always or usually hear it in a quiet room	Slightly	Both ears, equally
Participant 1715	35	Male	2	NaN	Constant: you can always or usually hear it in a quiet room	Not at all	Inside the head
Participant 1716	45	Female	3	1	Constant: you can always or usually hear it in a quiet room	Moderately	Both ears, equally
Participant 1717	35	Male	4	1	Constant: you can always or usually hear it in a quiet room	Slightly	Other (please specify below)
Participant 1718	53	Female	0	0	Intermittent: "comes and goes", cannot always hear it in a quiet room	Slightly	Inside the head
Participant 1719	37	Female	6	1	Constant: you can always or usually hear it in a quiet room	Severely	Right ear
Participant 1720	34	Male	5	0	Constant: you can always or usually hear it in a quiet room	Slightly	Both ears, worse in right
Participant 1721	40	Male	5	0	Constant: you can always or usually hear it in a quiet room	Severely	Both ears, equally
Participant 1722	45	Female	0	0	Intermittent: "comes and goes", cannot always hear it in a quiet room	Slightly	Both ears, worse in right
Participant 1723	40	Female	2	0	Constant: you can always or usually hear it in a quiet room	Slightly	Inside the head
Participant 1724	55	Female	0	0	Constant: you can always or usually hear it in a quiet room	Moderately	Both ears, equally
Participant 1725	30	Female	3	1	Constant: you can always or usually hear it in a quiet room	Moderately	Both ears, worse in left
Participant 1726	59	Female	3	0	Constant: you can always or usually hear it in a quiet room	Severely	Inside the head
Participant 1727	52	Male	2	NaN	Constant: you can always or usually hear it in a quiet room	Moderately	Both ears, equally
Participant 1728	26	Female	5	4	Intermittent: "comes and goes", cannot always hear it in a quiet room	Slightly	Both ears, worse in left
Participant 1729	66	Female	0	0	Constant: you can always or usually hear it in a quiet room	Moderately	Left ear
Participant 1730	72	Male	NaN	3	Constant: you can always or usually hear it in a quiet room	Moderately	Inside the head
Participant 1731	33	Male	2	0	Constant: you can always or usually hear it in a quiet room	Moderately	Both ears, worse in right
Participant 1732	38	Female	1	0	Intermittent: "comes and goes", cannot always hear it in a quiet room	Not at all	Inside the head
Participant 1733	30	Female	0	0	Intermittent: "comes and goes", cannot always hear it in a quiet room	Slightly	Both ears, worse in right
Participant 1734	66	Male	0	0	Intermittent: "comes and goes", cannot always hear it in a quiet room	Slightly	Both ears, equally
Participant 1735	54	Female	4	0	Constant: you can always or usually hear it in a quiet room	Not at all	Left ear
Participant 1736	24	Female	2	0	Intermittent: "comes and goes", cannot always hear it in a quiet room	Not at all	Inside the head
Participant 1737	40	Female	1	0	Constant: you can always or usually hear it in a quiet room	Not at all	Both ears, worse in right
Participant 1738	69	Female	1	0	Constant: you can always or usually hear it in a quiet room	Severely	Right ear
Participant 1739	56	Female	3	0	Constant: you can always or usually hear it in a quiet room	Slightly	Both ears, equally
Participant 1740	61	Female	2	0	Constant: you can always or usually hear it in a quiet room	Severely	Both ears, equally
Participant 1741	59	Male	0	0	Constant: you can always or usually hear it in a quiet room	Severely	Inside the head
Participant 1742	71	Female	2	0	Constant: you can always or usually hear it in a quiet room	Not at all	Both ears, equally
Participant 1743	65	Female	1	NaN	Constant: you can always or usually hear it in a quiet room	Severely	Both ears, worse in left
Participant 1744	53	Female	1	NaN	Intermittent: "comes and goes", cannot always hear it in a quiet room	Slightly	Both ears, equally
Participant 1745	51	Female	1	NaN	Intermittent: "comes and goes", cannot always hear it in a quiet room	Moderately	Inside the head
Participant 1746	46	Female	2	0	Intermittent: "comes and goes", cannot always hear it in a quiet room	Slightly	Both ears, worse in left
Participant 1747	70	Female	NaN	NaN	Intermittent: "comes and goes", cannot always hear it in a quiet room	Slightly	Right ear
Participant 1748	71	Female	3	1	Constant: you can always or usually hear it in a quiet room	Moderately	Inside the head
Participant 1749	58	Female	2	NaN	Constant: you can always or usually hear it in a quiet room	Slightly	Both ears, equally
Participant 1750	63	Female	1	0	Constant: you can always or usually hear it in a quiet room	Moderately	Both ears, equally
Participant 1751	60	Female	0	0	Constant: you can always or usually hear it in a quiet room	Moderately	Both ears, equally
Participant 1752	52	Female	0	0	Constant: you can always or usually hear it in a quiet room	Not at all	Right ear
Participant 1753	39	Male	2	0	Constant: you can always or usually hear it in a quiet room	Slightly	Both ears, equally
Participant 1754	75	Male	1	NaN	Intermittent: "comes and goes", cannot always hear it in a quiet room	Not at all	Both ears, worse in left
Participant 1755	27	Male	1	0	Constant: you can always or usually hear it in a quiet room	Not at all	Both ears, equally
Participant 1756	37	Female	0	0	Constant: you can always or usually hear it in a quiet room	Not at all	Inside the head
Participant 1757	55	Male	2	0	Constant: you can always or usually hear it in a quiet room	Slightly	Both ears, worse in left
Participant 1758	53	Male	1	0	Constant: you can always or usually hear it in a quiet room	Moderately	Both ears, equally
Participant 1759	52	Male	1	NaN	Constant: you can always or usually hear it in a quiet room	Moderately	Right ear
Participant 1760	67	Female	2	1	Constant: you can always or usually hear it in a quiet room	Moderately	Both ears, worse in right
Participant 1761	33	Male	2	0	Intermittent: "comes and goes", cannot always hear it in a quiet room	Slightly	Both ears, worse in left
Participant 1762	41	Male	1	0	Constant: you can always or usually hear it in a quiet room	Slightly	Both ears, equally
Participant 1763	36	Female	3	0	Intermittent: "comes and goes", cannot always hear it in a quiet room	Not at all	Both ears, worse in right
Participant 1764	51	Male			Intermittent: "comes and goes", cannot always hear it in a quiet room	Not at all	Inside the head
Participant 1765	77	Female	2	0	Constant: you can always or usually hear it in a quiet room	Slightly	Inside the head
Participant 1766	39	Female	0	0	Intermittent: "comes and goes", cannot always hear it in a quiet room	Not at all	Inside the head
Participant 1767	54	Female	5	0	Constant: you can always or usually hear it in a quiet room	Moderately	Both ears, equally
Participant 1768	35	Male	5	0	Constant: you can always or usually hear it in a quiet room	Moderately	Both ears, equally
Participant 1769	51	Female	2	0	Intermittent: "comes and goes", cannot always hear it in a quiet room	Slightly	Left ear
Participant 1770	34	Female	1	0	Intermittent: "comes and goes", cannot always hear it in a quiet room	Not at all	Right ear
Participant 1771	46	Male	1	1	Intermittent: "comes and goes", cannot always hear it in a quiet room	Slightly	Both ears, equally
Participant 1772	48	Male	2	0	Constant: you can always or usually hear it in a quiet room	Not at all	Both ears, worse in left
Participant 1773	30	Male	0	0	Intermittent: "comes and goes", cannot always hear it in a quiet room	Moderately	Right ear
Participant 1774	44	Female	2	1	Intermittent: "comes and goes", cannot always hear it in a quiet room	Not at all	Inside the head
Participant 1775	60	Female	2	0	Constant: you can always or usually hear it in a quiet room	Slightly	Left ear
Participant 1776	51	Male	2	0	Intermittent: "comes and goes", cannot always hear it in a quiet room	Slightly	Inside the head
Participant 1777	54	Male	1	0	Constant: you can always or usually hear it in a quiet room	Moderately	Both ears, equally
Participant 1778	61	Male	2	0	Intermittent: "comes and goes", cannot always hear it in a quiet room	Moderately	Both ears, equally
Participant 1779	55	Female	2	0	Intermittent: "comes and goes", cannot always hear it in a quiet room	Slightly	Inside the head
Participant 1780	31	Male	0	0	Constant: you can always or usually hear it in a quiet room	Slightly	Inside the head
Participant 1781	58	Female	1	0	Constant: you can always or usually hear it in a quiet room	Slightly	Both ears, equally
Participant 1782	26	Male	2	0	Intermittent: "comes and goes", cannot always hear it in a quiet room	Slightly	Do not know
Participant 1783	54	Female	1	0	Constant: you can always or usually hear it in a quiet room	Severely	Inside the head
Participant 1784	66	Female	1	0	Constant: you can always or usually hear it in a quiet room	Slightly	Inside the head
Participant 1785	45	Male			Constant: you can always or usually hear it in a quiet room	Slightly	Inside the head
Participant 1786	42	Male	1	NaN	Constant: you can always or usually hear it in a quiet room	Slightly	Left ear
Participant 1787	38	Male	0	0	Intermittent: "comes and goes", cannot always hear it in a quiet room	Not at all	Inside the head
Participant 1788	29	Female	1	0	Intermittent: "comes and goes", cannot always hear it in a quiet room	Slightly	Right ear
Participant 1789	41	Male	1	0	Constant: you can always or usually hear it in a quiet room	Slightly	Left ear
Participant 1790	44	Female	5	0	Intermittent: "comes and goes", cannot always hear it in a quiet room	Not at all	Both ears, equally
Participant 1791	44	Male	6	0	Intermittent: "comes and goes", cannot always hear it in a quiet room	Moderately	Left ear
Participant 1792	55	Male	1	0	Constant: you can always or usually hear it in a quiet room	Slightly	Inside the head
Participant 1793	32	Female	2	0	Intermittent: "comes and goes", cannot always hear it in a quiet room	Slightly	Right ear
Participant 1794	41	Female	2	0	Constant: you can always or usually hear it in a quiet room	Moderately	Right ear
Participant 1795	28	Male	1	0	Constant: you can always or usually hear it in a quiet room	Slightly	Both ears, worse in left
Participant 1796	41	Male	2	1	Constant: you can always or usually hear it in a quiet room	Moderately	Inside the head
Participant 1797	34	Male	2	0	Constant: you can always or usually hear it in a quiet room	Slightly	Both ears, equally
Participant 1798	58	Female	2	1	Constant: you can always or usually hear it in a quiet room	Moderately	Inside the head
Participant 1799	49	Male	1	0	Intermittent: "comes and goes", cannot always hear it in a quiet room	Slightly	Both ears, equally
Participant 1800	49	Female	1	NaN	Intermittent: "comes and goes", cannot always hear it in a quiet room	Slightly	Inside the head
Participant 1801	40	Female	3	0	Intermittent: "comes and goes", cannot always hear it in a quiet room	Slightly	Inside the head
Participant 1802	50	Female	NaN	NaN	Constant: you can always or usually hear it in a quiet room	Severely	Both ears, equally
Participant 1803	28	Male	3	1	Constant: you can always or usually hear it in a quiet room	Moderately	Both ears, equally
Participant 1804	71	Female	2	1	Constant: you can always or usually hear it in a quiet room	Moderately	Both ears, worse in left
Participant 1805	57	Female	2	0	Constant: you can always or usually hear it in a quiet room	Slightly	Left ear
Participant 1806	45	Female	1	0	Intermittent: "comes and goes", cannot always hear it in a quiet room	Not at all	Both ears, equally
Participant 1807	56	Male	0	NaN	Constant: you can always or usually hear it in a quiet room	Severely	Both ears, equally
Participant 1808	34	Female	2	1	Intermittent: "comes and goes", cannot always hear it in a quiet room	Not at all	Inside the head
Participant 1809	53	Female	1	0	Constant: you can always or usually hear it in a quiet room	Slightly	Both ears, worse in left
Participant 1810	69	Female	3	0	Intermittent: "comes and goes", cannot always hear it in a quiet room	Moderately	Inside the head
Participant 1811	31	Female	1	0	Constant: you can always or usually hear it in a quiet room	Not at all	Both ears, equally
Participant 1812	61	Female	1	1	Constant: you can always or usually hear it in a quiet room	Severely	Left ear
Participant 1813	76	Male	1	NaN	Constant: you can always or usually hear it in a quiet room	Severely	Inside the head
Participant 1814	47	Male	1	0	Constant: you can always or usually hear it in a quiet room	Slightly	Both ears, equally
Participant 1815	63	Female			Intermittent: "comes and goes", cannot always hear it in a quiet room	Moderately	Both ears, equally
Participant 1816	32	Female	2	0	Intermittent: "comes and goes", cannot always hear it in a quiet room	Not at all	Both ears, equally
Participant 1817	41	Male	3	1	Constant: you can always or usually hear it in a quiet room	Not at all	Both ears, equally
Participant 1818	39	Female			Intermittent: "comes and goes", cannot always hear it in a quiet room	Moderately	Right ear
Participant 1819	61	Female	0	0	Constant: you can always or usually hear it in a quiet room	Severely	Inside the head
Participant 1820	52	Female	1	0	Intermittent: "comes and goes", cannot always hear it in a quiet room	Slightly	Inside the head
Participant 1821	66	Female	2	0	Constant: you can always or usually hear it in a quiet room	Moderately	Both ears, equally
Participant 1822	61	Male	3	0	Constant: you can always or usually hear it in a quiet room	Moderately	Both ears, equally
Participant 1823	39	Male	1	0	Constant: you can always or usually hear it in a quiet room	Not at all	Both ears, equally
Participant 1824	41	Female	1	0	Intermittent: "comes and goes", cannot always hear it in a quiet room	Moderately	Right ear
Participant 1825	34	Female	3	1	Constant: you can always or usually hear it in a quiet room	Slightly	Both ears, equally
Participant 1826	33	Male	4	0	Intermittent: "comes and goes", cannot always hear it in a quiet room	Slightly	Both ears, equally
Participant 1827	39	Male	1	0	Intermittent: "comes and goes", cannot always hear it in a quiet room	Slightly	Do not know
Participant 1828	38	Female	0	0	Intermittent: "comes and goes", cannot always hear it in a quiet room	Slightly	Both ears, worse in left
Participant 1829	52	Male	2	0	Constant: you can always or usually hear it in a quiet room	Not at all	Both ears, worse in right
Participant 1830	59	Male	1	NaN	Constant: you can always or usually hear it in a quiet room	Slightly	Both ears, equally
Participant 1831	33	Male	3	0	Intermittent: "comes and goes", cannot always hear it in a quiet room	Not at all	Both ears, equally
Participant 1832	78	Male	0	0	Constant: you can always or usually hear it in a quiet room	Slightly	Both ears, equally
Participant 1833	39	Female	1	1	Constant: you can always or usually hear it in a quiet room	Not at all	Right ear
Participant 1834	70	Male	0	0	Constant: you can always or usually hear it in a quiet room	Moderately	Inside the head
Participant 1835	54	Female	1	1	Intermittent: "comes and goes", cannot always hear it in a quiet room	Moderately	Inside the head
Participant 1836	55	Male	4	1	Intermittent: "comes and goes", cannot always hear it in a quiet room	Slightly	Both ears, worse in right
Participant 1837	30	Male	4	1	Constant: you can always or usually hear it in a quiet room	Slightly	Both ears, worse in right
Participant 1838	54	Female	1	0	Intermittent: "comes and goes", cannot always hear it in a quiet room	Moderately	Both ears, equally
Participant 1839	34	Male	2	0	Intermittent: "comes and goes", cannot always hear it in a quiet room	Slightly	Both ears, equally
Participant 1840	65	Male	1	0	Constant: you can always or usually hear it in a quiet room	Moderately	Both ears, worse in right
Participant 1841	24	Male	1	1	Intermittent: "comes and goes", cannot always hear it in a quiet room	Slightly	Both ears, worse in left
Participant 1842	52	Male	2	1	Constant: you can always or usually hear it in a quiet room	Slightly	Both ears, worse in left
Participant 1843	47	Male	2	0	Constant: you can always or usually hear it in a quiet room	Moderately	Inside the head
Participant 1844	69	Male	NaN	NaN	Constant: you can always or usually hear it in a quiet room	Slightly	Both ears, equally
Participant 1845	46	Male	7	0	Intermittent: "comes and goes", cannot always hear it in a quiet room	Not at all	Both ears, equally
Participant 1846	54	Male	1	0	Intermittent: "comes and goes", cannot always hear it in a quiet room	Slightly	Both ears, worse in left
Participant 1847	38	Male	1	0	Constant: you can always or usually hear it in a quiet room	Slightly	Both ears, equally
Participant 1848	40	Female	1	0	Intermittent: "comes and goes", cannot always hear it in a quiet room	Slightly	Both ears, worse in left
Participant 1849	49	Male	1	0	Constant: you can always or usually hear it in a quiet room	Moderately	Both ears, equally
Participant 1850	26	Male	3	0	Constant: you can always or usually hear it in a quiet room	Moderately	Both ears, equally
Participant 1851	51	Female	2	0	Constant: you can always or usually hear it in a quiet room	Slightly	Both ears, equally
Participant 1852	87	Female	0	NaN	Constant: you can always or usually hear it in a quiet room	Moderately	Right ear
Participant 1853	45	Male	4	0	Intermittent: "comes and goes", cannot always hear it in a quiet room	Not at all	Inside the head
Participant 1854	46	Female	4	0	Constant: you can always or usually hear it in a quiet room	Slightly	Do not know
Participant 1855	42	Female	1	0	Intermittent: "comes and goes", cannot always hear it in a quiet room	Slightly	Both ears, equally
Participant 1856	69	Male	2	0	Constant: you can always or usually hear it in a quiet room	Slightly	Both ears, equally
Participant 1857	41	Female	0	0	Intermittent: "comes and goes", cannot always hear it in a quiet room	Slightly	Both ears, equally
Participant 1858	54	Male	1	0	Constant: you can always or usually hear it in a quiet room	Not at all	Both ears, worse in right
Participant 1859	60	Female	3	2	Constant: you can always or usually hear it in a quiet room	Severely	Left ear
Participant 1860	68	Male	2	0	Constant: you can always or usually hear it in a quiet room	Moderately	Inside the head
Participant 1861	31	Female	1	0	Constant: you can always or usually hear it in a quiet room	Not at all	Inside the head
Participant 1862	60	Female	0	NaN	Constant: you can always or usually hear it in a quiet room	Slightly	Both ears, worse in right
Participant 1863	54	Male	1	0	Constant: you can always or usually hear it in a quiet room	Slightly	Both ears, equally
Participant 1864	42	Female	1	0	Intermittent: "comes and goes", cannot always hear it in a quiet room	Moderately	Right ear
Participant 1865	47	Male	1	0	Constant: you can always or usually hear it in a quiet room	Slightly	Inside the head
Participant 1866	69	Female	2	0	Intermittent: "comes and goes", cannot always hear it in a quiet room	Slightly	Inside the head
Participant 1867	77	Male	1	1	Constant: you can always or usually hear it in a quiet room	Moderately	Both ears, equally
Participant 1868	56	Female	1	0	Constant: you can always or usually hear it in a quiet room	Severely	Both ears, equally
Participant 1869	43	Male	2	0	Constant: you can always or usually hear it in a quiet room	Moderately	Both ears, worse in left
Participant 1870	70	Female	0	0	Constant: you can always or usually hear it in a quiet room	Moderately	Both ears, worse in right
Participant 1871	35	Male	0	0	Constant: you can always or usually hear it in a quiet room	Moderately	Both ears, equally
Participant 1872	37	Male	3	NaN	Intermittent: "comes and goes", cannot always hear it in a quiet room	Moderately	Both ears, worse in right
Participant 1873	34	Male	2	0	Constant: you can always or usually hear it in a quiet room	Moderately	Inside the head
Participant 1874	61	Female	1	NaN	Constant: you can always or usually hear it in a quiet room	Slightly	Both ears, worse in left
Participant 1875	22	Male	4	0	Constant: you can always or usually hear it in a quiet room	Not at all	Both ears, equally
Participant 1876	35	Male	1	0	Constant: you can always or usually hear it in a quiet room	Not at all	Inside the head
Participant 1877	44	Male	1	NaN	Intermittent: "comes and goes", cannot always hear it in a quiet room	Slightly	Both ears, worse in left
Participant 1878	42	Male	4	NaN	Intermittent: "comes and goes", cannot always hear it in a quiet room	Slightly	Do not know
Participant 1879	33	Male	2	1	Constant: you can always or usually hear it in a quiet room	Moderately	Inside the head
Participant 1880	45	Male	2	0	Constant: you can always or usually hear it in a quiet room	Moderately	Inside the head
Participant 1881	66	Male	1	NaN	Constant: you can always or usually hear it in a quiet room	Moderately	Both ears, equally
Participant 1882	47	Female	4	0	Intermittent: "comes and goes", cannot always hear it in a quiet room	Slightly	Both ears, equally
Participant 1883	50	Male	0	0	Constant: you can always or usually hear it in a quiet room	Not at all	Inside the head
Participant 1884	42	Male	0	0	Intermittent: "comes and goes", cannot always hear it in a quiet room	Slightly	Both ears, equally
Participant 1885	36	Male	2	0	Constant: you can always or usually hear it in a quiet room	Not at all	Right ear
Participant 1886	31	Male	1	0	Constant: you can always or usually hear it in a quiet room	Not at all	Both ears, worse in left
Participant 1887	58	Male	1	0	Constant: you can always or usually hear it in a quiet room	Moderately	Both ears, equally
Participant 1888	66	Male	1	1	Constant: you can always or usually hear it in a quiet room	Slightly	Both ears, equally
Participant 1889	45	Male	1	0	Constant: you can always or usually hear it in a quiet room	Slightly	Both ears, equally
Participant 1890	69	Male	1	0	Constant: you can always or usually hear it in a quiet room	Slightly	Both ears, worse in left
Participant 1891	37	Female	0	0	Intermittent: "comes and goes", cannot always hear it in a quiet room	Not at all	Both ears, equally
Participant 1892	63	Female	1	0	Constant: you can always or usually hear it in a quiet room	Slightly	Both ears, equally
Participant 1893	30	Female	1	1	Intermittent: "comes and goes", cannot always hear it in a quiet room	Not at all	Both ears, equally
Participant 1894	39	Male	0	0	Constant: you can always or usually hear it in a quiet room	Slightly	Inside the head
Participant 1895	48	Female	4	NaN	Intermittent: "comes and goes", cannot always hear it in a quiet room	Slightly	Inside the head
Participant 1896	26	Male	1	0	Constant: you can always or usually hear it in a quiet room	Severely	Both ears, equally
Participant 1897	40	Male	0	0	Constant: you can always or usually hear it in a quiet room	Slightly	Both ears, worse in left
Participant 1898	70	Female	3	1	Constant: you can always or usually hear it in a quiet room	Do not know	Left ear
Participant 1899	61	Female	0	0	Constant: you can always or usually hear it in a quiet room	Slightly	Inside the head
Participant 1900	65	Female	1	NaN	Intermittent: "comes and goes", cannot always hear it in a quiet room	Moderately	Both ears, equally
Participant 1901	32	Female	1	NaN	Intermittent: "comes and goes", cannot always hear it in a quiet room	Moderately	Both ears, equally
Participant 1902	52	Female	1	0	Constant: you can always or usually hear it in a quiet room	Moderately	Left ear
Participant 1903	52	Female	1	1	Constant: you can always or usually hear it in a quiet room	Slightly	Both ears, equally
Participant 1904	51	Female	1	0	Constant: you can always or usually hear it in a quiet room	Not at all	Both ears, equally
Participant 1905	39	Female	3	1	Constant: you can always or usually hear it in a quiet room	Slightly	Both ears, equally
Participant 1906	68	Female	1	0	Constant: you can always or usually hear it in a quiet room	Severely	Inside the head
Participant 1907	55	Female	2	0	Intermittent: "comes and goes", cannot always hear it in a quiet room	Not at all	Inside the head
Participant 1908	50	Female	1	0	Constant: you can always or usually hear it in a quiet room	Moderately	Both ears, worse in left
Participant 1909	50	Female	1	0	Constant: you can always or usually hear it in a quiet room	Moderately	Other (please specify below)
Participant 1910	80	Male	2	NaN	Constant: you can always or usually hear it in a quiet room	Slightly	Right ear
Participant 1911	76	Female	1	0	Constant: you can always or usually hear it in a quiet room	Not at all	Left ear
Participant 1912	29	Female	5	0	Constant: you can always or usually hear it in a quiet room	Slightly	Both ears, worse in right
Participant 1913	49	Female	3	0	Constant: you can always or usually hear it in a quiet room	Severely	Both ears, worse in left
Participant 1914	30	Female	3	0	Intermittent: "comes and goes", cannot always hear it in a quiet room	Slightly	Both ears, equally
Participant 1915	48	Female	0	0	Constant: you can always or usually hear it in a quiet room	Moderately	Both ears, equally
Participant 1916	40	Male	3	0	Intermittent: "comes and goes", cannot always hear it in a quiet room	Not at all	Both ears, equally
Participant 1917	60	Male	2	NaN	Constant: you can always or usually hear it in a quiet room	Moderately	Left ear
Participant 1918	56	Male	2	NaN	Constant: you can always or usually hear it in a quiet room	Slightly	Both ears, equally
Participant 1919	70	Female	2	NaN	Constant: you can always or usually hear it in a quiet room	Moderately	Inside the head
Participant 1920	54	Female	2	0	Constant: you can always or usually hear it in a quiet room	Moderately	Inside the head
Participant 1921	54	Female	NaN	NaN	Constant: you can always or usually hear it in a quiet room	Slightly	Both ears, equally
Participant 1922	70	Male	2	0	Constant: you can always or usually hear it in a quiet room	Slightly	Inside the head
Participant 1923		Female	2	0	Constant: you can always or usually hear it in a quiet room	Slightly	Left ear
Participant 1924	51	Female	1	0	Constant: you can always or usually hear it in a quiet room	Moderately	Inside the head
Participant 1925	31	Female	5	0	Constant: you can always or usually hear it in a quiet room	Slightly	Inside the head
Participant 1926	79	Female	1	1	Constant: you can always or usually hear it in a quiet room	Moderately	Both ears, worse in left
Participant 1927	76	Male	1	1	Constant: you can always or usually hear it in a quiet room	Moderately	Both ears, equally
Participant 1928	64	Female	0	0	Constant: you can always or usually hear it in a quiet room	Moderately	Both ears, equally
Participant 1929	34	Male	2	0	Intermittent: "comes and goes", cannot always hear it in a quiet room	Not at all	Both ears, worse in left
Participant 1930	70	Male	3	1	Intermittent: "comes and goes", cannot always hear it in a quiet room	Slightly	Both ears, equally
Participant 1931	78	Female	2	0	Intermittent: "comes and goes", cannot always hear it in a quiet room	Severely	Inside the head
Participant 1932	37	Male	3	0	Constant: you can always or usually hear it in a quiet room	Moderately	Both ears, worse in left
Participant 1933	75	Female	2	0	Constant: you can always or usually hear it in a quiet room	Moderately	Both ears, worse in right
Participant 1934	76	Male	2	NaN	Intermittent: "comes and goes", cannot always hear it in a quiet room	Moderately	Inside the head
Participant 1935	63	Male	1	1	Constant: you can always or usually hear it in a quiet room	Slightly	Inside the head
Participant 1936	65	Male	2	0	Intermittent: "comes and goes", cannot always hear it in a quiet room	Slightly	Both ears, equally
Participant 1937	71	Male	NaN	NaN	Intermittent: "comes and goes", cannot always hear it in a quiet room	Not at all	Inside the head
Participant 1938	59	Male	1	1	Constant: you can always or usually hear it in a quiet room	Moderately	Inside the head
Participant 1939	70	Female	1	0	Intermittent: "comes and goes", cannot always hear it in a quiet room	Moderately	Both ears, equally
Participant 1940	73	Male	1	0	Constant: you can always or usually hear it in a quiet room	Slightly	Both ears, equally
Participant 1941	52	Female	2	0	Constant: you can always or usually hear it in a quiet room	Do not know	Both ears, worse in left
Participant 1942	49	Female	1	0	Constant: you can always or usually hear it in a quiet room	Moderately	Both ears, equally
Participant 1943	54	Male	3	0	Constant: you can always or usually hear it in a quiet room	Not at all	Both ears, worse in right
Participant 1944	35	Female	4	1	Constant: you can always or usually hear it in a quiet room	Slightly	Both ears, equally
Participant 1945	37	Female	2	0	Constant: you can always or usually hear it in a quiet room	Slightly	Both ears, equally
Participant 1946	44	Female	2	NaN	Intermittent: "comes and goes", cannot always hear it in a quiet room	Not at all	Inside the head
Participant 1947	35	Male	2	NaN	Constant: you can always or usually hear it in a quiet room	Moderately	Both ears, worse in right
Participant 1948	57	Female	2	0	Intermittent: "comes and goes", cannot always hear it in a quiet room	Not at all	Both ears, equally
Participant 1949	39	Female	1	NaN	Intermittent: "comes and goes", cannot always hear it in a quiet room	Moderately	Both ears, worse in right
Participant 1950	48	Female	NaN	NaN	Constant: you can always or usually hear it in a quiet room	Slightly	Left ear
Participant 1951	67	Female			Constant: you can always or usually hear it in a quiet room	Moderately	Both ears, equally
Participant 1952	72	Female	NaN	NaN	Intermittent: "comes and goes", cannot always hear it in a quiet room	Not at all	Both ears, equally
Participant 1953	74	Female	1	1	Intermittent: "comes and goes", cannot always hear it in a quiet room	Moderately	Both ears, worse in left
Participant 1954	50	Female	2	NaN	Constant: you can always or usually hear it in a quiet room	Slightly	Both ears, worse in left
Participant 1955	74	Female	3	1	Constant: you can always or usually hear it in a quiet room	Moderately	Both ears, worse in left
Participant 1956	56	Female	2	0	Constant: you can always or usually hear it in a quiet room	Moderately	Both ears, worse in right
Participant 1957	45	Male	1	NaN	Constant: you can always or usually hear it in a quiet room	Slightly	Left ear
Participant 1958	33	Male	0	0	Constant: you can always or usually hear it in a quiet room	Slightly	Both ears, equally
Participant 1959	49	Male	2	0	Constant: you can always or usually hear it in a quiet room	Moderately	Both ears, equally
Participant 1960	38	Male	0	0	Intermittent: "comes and goes", cannot always hear it in a quiet room	Slightly	Inside the head
Participant 1961	60	Female	3	NaN	Intermittent: "comes and goes", cannot always hear it in a quiet room	Severely	Inside the head
Participant 1962	37	Male	0	0	Intermittent: "comes and goes", cannot always hear it in a quiet room	Slightly	Both ears, equally
Participant 1963	37	Male	1	0	Constant: you can always or usually hear it in a quiet room	Severely	Both ears, equally
Participant 1964	39	Male	0	0	Constant: you can always or usually hear it in a quiet room	Moderately	Both ears, equally
Participant 1965	49	Male	1	0	Constant: you can always or usually hear it in a quiet room	Slightly	Both ears, equally
Participant 1966	54	Male	2	1	Constant: you can always or usually hear it in a quiet room	Severely	Other (please specify below)
Participant 1967	39	Female	2	0	Intermittent: "comes and goes", cannot always hear it in a quiet room	Slightly	Right ear
Participant 1968	68	Female	2	0	Constant: you can always or usually hear it in a quiet room	Slightly	Both ears, worse in left
Participant 1969	33	Female			Constant: you can always or usually hear it in a quiet room	Not at all	Inside the head
Participant 1970	73	Male	3	1	Constant: you can always or usually hear it in a quiet room	Not at all	Both ears, equally
Participant 1971	40	Male	1	NaN	Constant: you can always or usually hear it in a quiet room	Not at all	Both ears, worse in left
Participant 1972	29	Female	0	0	Constant: you can always or usually hear it in a quiet room	Slightly	Inside the head
Participant 1973	62	Female	2	1	Intermittent: "comes and goes", cannot always hear it in a quiet room	Moderately	Both ears, equally
Participant 1974	45	Female	2	0	Intermittent: "comes and goes", cannot always hear it in a quiet room	Slightly	Do not know
Participant 1975	34	Female	2	0	Intermittent: "comes and goes", cannot always hear it in a quiet room	Slightly	Do not know
Participant 1976	48	Female	2	NaN	Constant: you can always or usually hear it in a quiet room	Moderately	Both ears, equally
Participant 1977	33	Male	1	1	Constant: you can always or usually hear it in a quiet room	Moderately	Both ears, equally
Participant 1978	40	Female	1	0	Constant: you can always or usually hear it in a quiet room	Severely	Both ears, worse in left
Participant 1979	33	Female	2	0	Constant: you can always or usually hear it in a quiet room	Slightly	Both ears, equally
Participant 1980	46	Male	NaN	NaN	Constant: you can always or usually hear it in a quiet room	Moderately	Both ears, worse in right
Participant 1981	43	Female	4	0	Intermittent: "comes and goes", cannot always hear it in a quiet room	Slightly	Both ears, worse in left
Participant 1982	58	Male	2	0	Constant: you can always or usually hear it in a quiet room	Slightly	Both ears, equally
Participant 1983	37	Male	1	0	Constant: you can always or usually hear it in a quiet room	Moderately	Inside the head
Participant 1984	53	Male	3	0	Constant: you can always or usually hear it in a quiet room	Slightly	Both ears, worse in right
Participant 1985	43	Male	2	0	Intermittent: "comes and goes", cannot always hear it in a quiet room	Not at all	Both ears, equally
Participant 1986	36	Male	1	0	Constant: you can always or usually hear it in a quiet room	Moderately	Both ears, worse in left
Participant 1987	50	Male	2	0	Constant: you can always or usually hear it in a quiet room	Slightly	Both ears, equally
Participant 1988	51	Male	2	0	Constant: you can always or usually hear it in a quiet room	Moderately	Both ears, equally
Participant 1989	28	Female	3	0	Constant: you can always or usually hear it in a quiet room	Moderately	Both ears, equally
Participant 1990	72	Male	2	0	Constant: you can always or usually hear it in a quiet room	Not at all	Inside the head
Participant 1991	64	Female	NaN	0	Constant: you can always or usually hear it in a quiet room	Slightly	Both ears, equally
Participant 1992	59	Female	1	0	Intermittent: "comes and goes", cannot always hear it in a quiet room	Slightly	Both ears, worse in left
Participant 1993	31	Male			Constant: you can always or usually hear it in a quiet room	Not at all	Right ear
Participant 1994	43	Female	0	0	Constant: you can always or usually hear it in a quiet room	Moderately	Both ears, equally
Participant 1995	76	Male			Constant: you can always or usually hear it in a quiet room	Slightly	Both ears, equally
Participant 1996	73	Male	NaN	NaN	Constant: you can always or usually hear it in a quiet room	Moderately	Left ear
Participant 1997	70	Male	2	NaN	Constant: you can always or usually hear it in a quiet room	Slightly	Both ears, equally
Participant 1998	73	Female	1	0	Intermittent: "comes and goes", cannot always hear it in a quiet room	Slightly	Both ears, worse in left
Participant 1999	64	Male	3	0	Constant: you can always or usually hear it in a quiet room	Slightly	Both ears, equally
[truncated: 306 more rows]
